# Supplementary material
Source: PubMed Central journal article supplement (PMC2746888)
Supplement: 438_2009_475_MOESM1_ESM.pdf [file 438_2009_475_MOESM1_ESM.pdf]

## Major ORFs

| GLV-1h68          | WR                              | COP                           |            | Annotation                                                                                                                                                                                                                                                                                                                                       |
|-------------------|---------------------------------|-------------------------------|------------|--------------------------------------------------------------------------------------------------------------------------------------------------------------------------------------------------------------------------------------------------------------------------------------------------------------------------------------------------|
| GL001  290        | VACWR001  218                   | GI:335318  577                | C23L  B29R | chemokine-binding protein                                                                                                                                                                                                                                                                                                                        |
| /-                | /-                              | GI:335320                     |            | Putative C ORF G,<br>- nonsense mutation in GLV-1h68, WR, considered as pseudogenes                                                                                                                                                                                                                                                              |
| GL003  289*       | 4714..4556<br> 189998..190156   | 5347..5189<br> 186391..186549 |            | fragment of Tumor necrosis factor receptor,<br>* a frame shift mutation in GLV-1h68, leads to a longer ORF (63aa) in 1h68 than the ORF(52aa) in WR(4714..4524, 189998..190188)  COP(5347..5157, 186391..186581), using a premature start codon. We consider GL003 288 as a pseudo strain-specific (low orthology), due to the length difference. |
| /*                | VACWR002  217                   | /*                            |            | TNF-alpha-receptor-like protein,<br>* a frame shift mutation in GLV-1h68 (2446..2241)  COP(5627..5422, 186111..186316), in addition, with another start codon, two peptides (30aa and 34aa) might be translated instead of a 61aa-protein in WR                                                                                                  |
| /*                | VACWR003  216                   | /*                            |            | Unknown protein (gene fragment)<br>* a frame shift mutation in GLV-1h68 (2371..2606)  COP(5552..5787, 186186..185951), the original ORF is completely disrupted in COP and 1h68                                                                                                                                                                  |
| GL004  288        | VACWR004  215                   | GI:335321  576                | C22L  B28R | TNF-alpha-receptor-like protein                                                                                                                                                                                                                                                                                                                  |
| GL004.5<br> 287.5 | VACWR005  214                   | 6377..6231<br> 185361..185507 |            | ankyrin-like protein                                                                                                                                                                                                                                                                                                                             |
| /                 | VACWR006  213                   | GI:335322  575                | C21L B27R  | putative C21L, ankyrin-like protein                                                                                                                                                                                                                                                                                                              |
| /                 | VACWR007  212                   | GI:335323  574                | C20L B26R  | putative C20L, ankyrin-like protein                                                                                                                                                                                                                                                                                                              |
| /                 | VACWR008  211*-                 | GI:335324  573                | C19L B25R  | putative C19L ankyrin-like protein,<br>*- a frame shift mutation. 103aa segment of (112aa in WR008/211) is identical with C19L/B25R(259aa in COP)                                                                                                                                                                                                |
| /                 | 6914..7126*<br> 187798..187586* | GI:335325  572                |            | putative C ORF F,<br>* a frame shift mutation at the late location (in low complex region), the alignment has good identity, but the end 20aa is totally novel, thus we consider it as pseudo strain-specific due to the low identity.                                                                                                           |
| GL005  287        | /                               | /                             |            | ankyrin-like protein [Vaccinia virus]                                                                                                                                                                                                                                                                                                            |
| GL006  286*       | /                               | GI:335326  571                | C18L B24R  | putative; host range protein [Vaccinia virus]<br>* a frame shift mutation occurs, GL006 is identical to the early fragment (49aa) of C18L, B24R(150aa).                                                                                                                                                                                          |
| /                 |                                 |                               |            | putative C18L, B24R                                                                                                                                                                                                                                                                                                                              |
| GL007  285*       | /                               | GI:335327  570                | C17L B23R  | putative host range polypeptide<br>* a frame-shift mutation                                                                                                                                                                                                                                                                                      |
| GL008  284*       | /                               | GI:335328  569                | C16L B22R  | putative C16L                                                                                                                                                                                                                                                                                                                                    |
| /                 | /                               | GI:335329  568                | C15L B21R  | putative C15L                                                                                                                                                                                                                                                                                                                                    |

|                |               |              |      |                                                                                                                          |
|----------------|---------------|--------------|------|--------------------------------------------------------------------------------------------------------------------------|
| GL009  283     | VACWR205      | GI:335332    | C12L | serine protease inhibitor-like SPI-1                                                                                     |
| GL009.5  282.5 | VACWR204.5    | 264          |      | very short ORF, well conserved putative early and late promoter                                                          |
| GL010  282     | VACWR009  210 | GI:335333    | C11R | secreted epidermal growth factor                                                                                         |
| GL011  280     | VACWR010  209 | GI:335334    | C10L | fragment of IL-1 receptor antagonist                                                                                     |
| GL013  279     | VACWR011  208 | /            |      | zinc finger-like protein                                                                                                 |
| GL014  278     | VACWR012  207 | /            |      | zinc finger-like protein                                                                                                 |
| GL015  277     | VACWR013      | /            |      | interleukin-18-binding protein                                                                                           |
| GL016-         |               | /            |      | ankyrin-like protein                                                                                                     |
| GL017-         | VACWR014      | /            |      | ankyrin-like protein<br>- nonsense mutation, but with a closely-later start codon, the rest fragment might be translated |
| GL018          | VACWR015      | /            |      | ankyrin-like protein                                                                                                     |
| GL019          | VACWR016*     | /            |      | ankyrin-like protein * frame shift mutation                                                                              |
|                | VACWR017*     | /            |      | ankyrin-like protein * frame shift mutation                                                                              |
| /              | VACWR018      | /            |      | unknown                                                                                                                  |
| GL020          | /             | /            |      | unknown, orthologous to TC10L [Tian tan strain]                                                                          |
| GL021          | VACWR019      | GI:335336    | C9L  | ankyrin-like protein                                                                                                     |
| GL023          | VACWR020      | GI:335338    | C8L  | unknown protein                                                                                                          |
| GL023.5        |               |              |      | putative C ORF C,<br>- nonsense mutation in GLV-1h68, ORF translates a 45aa protein instead of 82aa in WR COP            |
| /              | 15121..15369  | GI:335339    |      |                                                                                                                          |
| GL025          | VACWR021      | GI:335341    | C7L  | host-range related protein                                                                                               |
| GL026          | VACWR022      | GI:335342    | C6L  | unknown protein with epitope hits                                                                                        |
| GL027          | VACWR023      | GI:335343    | C5L  | unknown protein with epitope hits                                                                                        |
| GL028          | VACWR024      | GI:335344    | C4L  | unknown protein with epitope hits                                                                                        |
| GL029          | VACWR025      | GI:335345    | C3L  | secreted complement binding                                                                                              |
| GL030          | 19411..19620  | GI:335346    |      | similar to putative C ORF A[COP]                                                                                         |
| GL031          | VACWR026      | GI:335347    | C2L  | kelch-like protein                                                                                                       |
| GL032          | VACWR027      | GI:335348    | C1L  | unknown                                                                                                                  |
| GL033          | VACWR028      | GI:335349    | N1L  | virokine                                                                                                                 |
| GL034          | VACWR029      | GI:335350    | N2L  | alpha-amanitin sensitive protein                                                                                         |
| GL035          | VACWR030      | GI:335351    | M1L  | ankyrin-like protein                                                                                                     |
| GL036          | VACWR031      | GI:335352    | M2L  | unknown                                                                                                                  |
| GL037          | VACWR032      | GI:335353    | K1L  | ankyrin-like protein                                                                                                     |
| GL038          | VACWR033      | GI:335354    | K2L  | serine protease inhibitor-like                                                                                           |
| GL041*         | 27312..27491  | 30369..30554 |      | hypothetical protein, orthologous to m0036R[Vaccinia],                                                                   |

|                |              |              |        |                                                                                                                                                                                                                                                                                                                                                                                                                                                                 |
|----------------|--------------|--------------|--------|-----------------------------------------------------------------------------------------------------------------------------------------------------------------------------------------------------------------------------------------------------------------------------------------------------------------------------------------------------------------------------------------------------------------------------------------------------------------|
|                |              |              |        | * a frame shift mutation, causes GL041 has to use another start codon (earlier than which in WR COL), it may translate a 78aa protein instead of the 61aa protein by WR COL (78% coverage), (pseudo-specific)                                                                                                                                                                                                                                                   |
| GL042          | VACWR034     | GI:335357    | K3L    | interferon resistance protein                                                                                                                                                                                                                                                                                                                                                                                                                                   |
| GL043          | VACWR035     | GI:335358    | K4L    | phospholipase-D-like protein                                                                                                                                                                                                                                                                                                                                                                                                                                    |
| GL044          | VACWR036     | 32117..31983 |        | putative monoglyceride lipase[Vaccinia]                                                                                                                                                                                                                                                                                                                                                                                                                         |
| GL045          | VACWR037     | GI:335359    | K5L    | putative monoglyceride lipase                                                                                                                                                                                                                                                                                                                                                                                                                                   |
| GL046          | VACWR038     | GI:335360    | K6L    | putative monoglyceride lipase                                                                                                                                                                                                                                                                                                                                                                                                                                   |
| GL047          | VACWR039     | GI:335361    | K7R    | unknown protein                                                                                                                                                                                                                                                                                                                                                                                                                                                 |
| GL049          | VACWR040     | GI:335362    | F1L    | putative protein localizes exclusively to the mitochondria where it functions to inhibit apoptosis                                                                                                                                                                                                                                                                                                                                                              |
| GL050          | VACWR041     | GI:335363    | F2L    | dUTPase                                                                                                                                                                                                                                                                                                                                                                                                                                                         |
| GL051          | VACWR042     | GI:335364    | F3L    | kelch-like protein                                                                                                                                                                                                                                                                                                                                                                                                                                              |
| GL053          | VACWR043     | GI:335366    | F4L    | ribonucleotide reductase small subunit                                                                                                                                                                                                                                                                                                                                                                                                                          |
| GL056          | VACWR044     | GI:335369    | F5L    | Major membrane protein                                                                                                                                                                                                                                                                                                                                                                                                                                          |
| GL057          | VACWR045     | GI:335370    | F6L    | unknown                                                                                                                                                                                                                                                                                                                                                                                                                                                         |
| GL058          | VACWR046     | GI:335371    | F7L    | unknown                                                                                                                                                                                                                                                                                                                                                                                                                                                         |
| GL059          | VACWR047     | GI:335372    | F8L    | protein with iActA-like proline repeats                                                                                                                                                                                                                                                                                                                                                                                                                         |
| GL060          | VACWR048     | GI:335373    | F9L    | S-S bond formation pathway protein (membrane)                                                                                                                                                                                                                                                                                                                                                                                                                   |
| GL061          | VACWR049     | GI:335374    | F10L   | ser/thr kinase                                                                                                                                                                                                                                                                                                                                                                                                                                                  |
| GL062          | 37757..37993 | GI:335375    |        | similar to putative F ORF D [COP]                                                                                                                                                                                                                                                                                                                                                                                                                               |
| GL063          | VACWR050     | GI:335376    | F11L   | unknown                                                                                                                                                                                                                                                                                                                                                                                                                                                         |
| GL064          | VACWR051     | GI:335377    | F12L   | involved in plaque and EEV formation                                                                                                                                                                                                                                                                                                                                                                                                                            |
| GL066          | VACWR052     | GI:335379    | F13L   | palmytilated EEV membrane protein                                                                                                                                                                                                                                                                                                                                                                                                                               |
| GL067          | VACWR053     | GI:335380    | F14L   | unknown protein                                                                                                                                                                                                                                                                                                                                                                                                                                                 |
| /*             | /*           | GI:335381    |        | putative F ORF F,<br>* a frame shift mutation at the very early position; causing dysfunctional proteins (if translated) in WR(42554..42664)  GLV-1h68<br>hypothetical 49aa protein in LIPV wt, WR and COP with Epitope database hit: 1072792, orthologous to m0062L[Vac]<br>- in GLV-1h68, the corresponding ORF is disrupted by a foreign insertion of Ruc-GFP and can not be translated, but the nucleotide sequence is intact after removing the insertion. |
| GL068-         | VACWR053.5   |              | F14.5L |                                                                                                                                                                                                                                                                                                                                                                                                                                                                 |
| <i>Ruc-GFP</i> |              |              |        | <i>Ruc-GFP insertion</i>                                                                                                                                                                                                                                                                                                                                                                                                                                        |
| GL069          | VACWR054     | GI:335382    | F15L   | unknown                                                                                                                                                                                                                                                                                                                                                                                                                                                         |
| GL070          | VACWR055     | GI:335383    | F16L   | unknown                                                                                                                                                                                                                                                                                                                                                                                                                                                         |
| GL071          | VACWR056     | GI:335384    | F17R   | putative DNA-binding phosphoprotein                                                                                                                                                                                                                                                                                                                                                                                                                             |
| GL073          | VACWR057     | GI:335386    | E1L    | poly-A polymerase catalytic subunit VP55                                                                                                                                                                                                                                                                                                                                                                                                                        |

|         |              |              |      |                                                                                                                                     |
|---------|--------------|--------------|------|-------------------------------------------------------------------------------------------------------------------------------------|
| GL074   | VACWR058     | GI:335387    | E2L  | unknown protein                                                                                                                     |
| GL075   | VACWR059     | GI:335388    | E3L  | double-stranded RNA binding protein                                                                                                 |
| GL076   | VACWR060     | GI:335389    | E4L  | DNA-dependent RNA polymerase subunit rpo30                                                                                          |
| GL077   | VACWR061     | GI:335390    | E5R  | abundant component of virosome                                                                                                      |
| GL079   | VACWR062     | GI:335392    | E6R  | unknown                                                                                                                             |
| GL080   | VACWR063     | GI:335393    | E7R  | soluble myristyl-protein                                                                                                            |
| GL082   | VACWR064     | GI:335395    | E8R  | membrane protein                                                                                                                    |
| GL084   | VACWR065     | GI:335397    | E9L  | DNA polymerase                                                                                                                      |
| GL086   | VACWR066     | GI:335399    | E10R | sulfhydryl oxidase                                                                                                                  |
| GL087   | VACWR067     | GI:335400    | E11L | virion core protein                                                                                                                 |
| GL088   | VACWR068     | GI:335401    | O1L  | Unknown protein                                                                                                                     |
| GL090   | 59356..59544 | 62487..62675 |      | unknown protein, orthologous to CPXV078A[Cowpox virus]                                                                              |
| GL091   | VACWR069     | GI:335403    | O2L  | nonessential glutaredoxin                                                                                                           |
| GL091.5 | VACWR069.5   | 266          |      | Extremely short(35aa), well conserved ORF with a good, well conserved putative early and late promoters                             |
| GL092   | VACWR070     | GI:335404    | I1L  | DNA-binding core protein                                                                                                            |
| GL093^  | VACWR071     | GI:335405    | I2L  | I2L(Cop), hypothetical protein (similar to m0086L[Vac]),<br>^ two amino acids deletion in the low complex region, still orthologous |
| GL094   | VACWR072     | GI:335406    | I3L  | ssDNA-binding phosphoprotein                                                                                                        |
| GL095   | VACWR073     | GI:335407    | I4L  | ribonucleotide reductase large subunit                                                                                              |
| GL098   | VACWR074     | GI:335409    | I5L  | IMV protein VP13                                                                                                                    |
| GL099   | VACWR075     | GI:335410    | I6L  | Protein binding to viral telomers and directing genome encapsidation                                                                |
| GL100   | VACWR076     | GI:335411    | I7L  | viral core cysteine proteinase                                                                                                      |
| GL101   | VACWR077     | GI:335412    | I8R  | RNA-helicase, DExH-NPH-II                                                                                                           |
| GL102   | VACWR078     | GI:335413    | G1L  | insulin metalloproteinase-like protein                                                                                              |
| GL103   | VACWR079     | GI:335414    | G3L  | unknown                                                                                                                             |
| GL104   | VACWR080     | GI:335415    | G2R  | late transcription elongation factor                                                                                                |
| GL105   | VACWR081     | GI:335416    | G4L  | thioredoxin-like protein                                                                                                            |
| GL106   | VACWR082     | GI:335417    | G5R  | Viral membrane formation protein, expressed early in infection, becomes incorporated in the viral core                              |
| GL107   | VACWR083     | G5.5R        |      | DNA-dependent RNA polymerase subunit rpo7                                                                                           |
| GL108   | VACWR084     | GI:335418    | G6R  | unknown                                                                                                                             |
| GL109   | VACWR085     | GI:335419    | G7L  | virion structural protein                                                                                                           |
| GL111   | 75339..75130 | GI:335421    |      | similar to (COP) putative G ORF B                                                                                                   |
| GL112   | VACWR086     | GI:335422    | G8R  | late gene transcription factor VLTF-1 (replication related)                                                                         |
| GL113   | VACWR087     | GI:335423    | G9R  | myristylprotein                                                                                                                     |

|                  |                |                |      |                                                                                                                                                                                    |
|------------------|----------------|----------------|------|------------------------------------------------------------------------------------------------------------------------------------------------------------------------------------|
| GL114            | VACWR088       | GI:335424      | L1R  | IMV membrane protein                                                                                                                                                               |
| GL115            | VACWR089       | GI:335425      | L2R  | unknown                                                                                                                                                                            |
| GL116            | VACWR090       | GI:335426      | L3L  | unknown                                                                                                                                                                            |
| GL117            | VACWR091       | GI:335427      | L4R  | core protein vp8                                                                                                                                                                   |
| GL118            | VACWR092       | GI:335428      | L5R  | putative membrane protein                                                                                                                                                          |
| GL119            | VACWR093       | GI:335429      | J1R  | virion protein                                                                                                                                                                     |
| GL120-<br>GL121- | VACWR094       | GI:335430      | J2R  | thymidine kinase - in GLV-1h68 the gene is disrupted by a nonsense mutation GAA (Lister strain) -> TAA (stop codon), forming two fragments, this latter one is likely not present. |
| <i>lacZ</i>      |                |                |      | <i>LacZ insertion</i>                                                                                                                                                              |
| GL122            | VACWR095       | GI:335431      | J3R  | multifunctional poly-A polymerase subunit                                                                                                                                          |
| GL123            | VACWR096       | GI:335432      | J4R  | DNA-dependent RNA polymerase subunit rpo22                                                                                                                                         |
| GL124            | VACWR097       | GI:335433      | J5L  | late 16kDa putative membrane protein                                                                                                                                               |
| GL125            | VACWR098       | GI:335434      | J6R  | DNA-dependent RNA polymerase subunit rpo147                                                                                                                                        |
| GL127            | VACWR099       | GI:335436      | H1L  | tyr/ser protein phosphatase                                                                                                                                                        |
| GL128            | VACWR100       | GI:335437      | H2R  | unknown                                                                                                                                                                            |
| GL129            | VACWR101       | GI:335438      | H3L  | IMV heparin binding surface protein                                                                                                                                                |
| GL130            | VACWR102       | GI:335439      | H4L  | RAP94, RNA polymerase associated transcription specificity factor                                                                                                                  |
| GL131            | VACWR103       | GI:335440      | H5R  | morphogenesis-related, substrate of B1R kinase                                                                                                                                     |
| GL132            | VACWR104       | GI:335441      | H6R  | topoisomerase type IB                                                                                                                                                              |
| GL133            | 93582..93400   | 96727..96545   |      | unknown, orthologous to CPXV1116[CPV: Cowpox virus]                                                                                                                                |
| GL134            | VACWR105       | GI:335442      | H7R  | unknown                                                                                                                                                                            |
| GL135            | VACWR106       | GI:335443      | D1R  | large subunit of mRNA capping enzyme                                                                                                                                               |
| GL137            | VACWR107       | GI:335445      | D2L  | virion core protein                                                                                                                                                                |
| GL139            | VACWR108       | GI:335447      | D3R  | virion core protein                                                                                                                                                                |
| GL140            | VACWR109       | GI:335448      | D4R  | uracil-DNA glycosylase                                                                                                                                                             |
| GL141            | 98480..98271   | GI:335449      |      | unknown protein, similar to putative D ORF C (COP)                                                                                                                                 |
| GL142            | VACWR110       | GI:335450      | D5R  | NTPase interacts with A20R                                                                                                                                                         |
| GL145            | VACWR111       | GI:335453      | D6R  | 70kDa small subunit of early gene transcription factor VETF                                                                                                                        |
| GL147            | VACWR112       | GI:335454      | D7R  | DNA-dependent RNA polymerase subunit rpo18                                                                                                                                         |
| GL148            | VACWR113       | GI:335455      | D8L  | IMV membrane protein                                                                                                                                                               |
| GL149            | VACWR114       | GI:335456      | D9R  | contains mutT-like motif of NTP-phosphohydrolase for DNA repair                                                                                                                    |
| GL150            | VACWR115       | GI:335457      | D10R | contains mutT-like motif of NTP-phosphohydrolase for DNA repair                                                                                                                    |
| GL151            | VACWR116       | GI:335458      | D11L | ATPase, nucleoside triphosphate phosphohydrolase-I, NPH-I                                                                                                                          |
| GL155            | VACWR117       | GI:335461      | D12L | small subunit of mRNA capping enzyme                                                                                                                                               |
| GL157            | 108157..108375 | 111302..111520 |      | unknown, orthologous to unknown protein[Tian tan]                                                                                                                                  |

|       |                        |            |        |                                                                                                                                                                                                                                        |
|-------|------------------------|------------|--------|----------------------------------------------------------------------------------------------------------------------------------------------------------------------------------------------------------------------------------------|
| GL158 | VACWR118               | GI:335462  | D13L   | Rifampicin resistance protein                                                                                                                                                                                                          |
| GL160 | VACWR119               | GI:335464  | A1L    | late gene transcription factor VLTF-2                                                                                                                                                                                                  |
| GL161 | VACWR120               | GI:335465  | A2L    | late gene transcription factor VLTF-3                                                                                                                                                                                                  |
| GL162 | VACWR121               |            | A2.5L  | S-S bond formation pathway                                                                                                                                                                                                             |
| GL163 | VACWR122               | GI:335466  | A3L    | p4b precursor of core protein 4b                                                                                                                                                                                                       |
| GL165 | VACWR123               | GI:335468  | A4L    | 39kDa core protein                                                                                                                                                                                                                     |
| GL167 | VACWR124               | GI:335470  | A5R    | DNA-dependent RNA polymerase subunit rpo19                                                                                                                                                                                             |
| GL168 | VACWR125               | GI:335471  | A6L    | virion core protein required for formation of mature virion                                                                                                                                                                            |
| GL169 | VACWR126               | GI:335472  | A7L    | 82kDa large subunit of early gene transcription factor VETF                                                                                                                                                                            |
| GL172 | VACWR127               | GI:335475  | A8R    | 32kDa small subunit of transcription factor VITF-3                                                                                                                                                                                     |
| GL173 | VACWR128               | GI:335476  | A9L    | IMV membrane protein                                                                                                                                                                                                                   |
| GL174 | VACWR129               | GI:335477  | A10L   | precursor p4a of core protein 4a                                                                                                                                                                                                       |
| GL178 | VACWR130               | GI:335481  | A11R   | Viral membranes formation                                                                                                                                                                                                              |
| GL179 | VACWR131               | GI:335482  | A12L   | core protein                                                                                                                                                                                                                           |
| GL180 | VACWR132               | GI:335483  | A13L   | IMV membrane protein                                                                                                                                                                                                                   |
| GL181 | VACWR133               | GI:335484  | A14L   | phosphorylated IMV membrane protein                                                                                                                                                                                                    |
| GL182 | VACWR134               |            | A14.5L | hydrophobic IV and IMV membrane protein                                                                                                                                                                                                |
| GL183 | VACWR135               | GI:335485  | A15L   | unknown                                                                                                                                                                                                                                |
| GL184 | VACWR136               | GI:335486  | A16L   | soluble myristylprotein                                                                                                                                                                                                                |
| GL185 | VACWR137               | GI:335487  | A17L   | IMV membrane protein                                                                                                                                                                                                                   |
| GL186 | VACWR138               | GI:335488  | A18R   | DNA helicase                                                                                                                                                                                                                           |
| GL187 | VACWR139               | GI:335489  | A19L   | unknown                                                                                                                                                                                                                                |
| GL188 | VACWR140               | GI:335490  | A21L   | Component of poxvirus multiprotein entry-fusion complex                                                                                                                                                                                |
| GL189 | VACWR141               | GI:335491  | A20R   | viral DNA polymerase processivity factor                                                                                                                                                                                               |
| GL192 | VACWR142               | GI:335494  | A22R   | cleaving viral DANN concatamers to yield unit-length viral genome (DNA holiday-junction resolvase)                                                                                                                                     |
| GL193 | VACWR143               | GI:335495  | A23R   | 45kDa large subunit of intermediate gene transcription factor VITF-3                                                                                                                                                                   |
| GL194 | VACWR144               | GI:335496  | A24R   | DNA-dependent RNA polymerase subunit rpo132                                                                                                                                                                                            |
| GL196 | VACWR145*<br>VACWR146* | GI:335498  | A25L   | cowpox A-type inclusion protein* frame shift mutation<br>cowpox A-type inclusion protein* frame shift mutation                                                                                                                         |
| GL197 | VACWR147               | /          |        | cowpox A-type inclusion protein                                                                                                                                                                                                        |
| GL199 | VACWR148               | /          |        | cowpox A-type inclusion protein                                                                                                                                                                                                        |
| /     | /                      | GI:335499^ | A26L   | putative A26L,<br>^ sequence segment rearrangement, the early 197aa of 332aa(COP) is identical with the early part of WR149, GL201, the rest sequence is derived from other region. GL201, WR149 are much longer (500aa), they can not |

|         |                |                |        |                                                                                                                                                                                                                                                                    |
|---------|----------------|----------------|--------|--------------------------------------------------------------------------------------------------------------------------------------------------------------------------------------------------------------------------------------------------------------------|
| GL201   | VACWR149       | /              |        | be considered as orthologs.<br>cowpox A-type inclusion protein                                                                                                                                                                                                     |
| GL203   | VACWR150       | GI:335500      | A27L   | IMV surface protein                                                                                                                                                                                                                                                |
| GL204   | VACWR151       | GI:335501      | A28L   | Membrane component of IMV                                                                                                                                                                                                                                          |
| GL205   | VACWR152       | GI:335502      | A29L   | DNA-dependent RNA polymerase rpo35                                                                                                                                                                                                                                 |
| GL206   | 141520..141732 | GI:335503      |        | similar to (COP) putative A ORF K                                                                                                                                                                                                                                  |
| GL207   | VACWR153       | GI:335504      | A30L   | IMV protein                                                                                                                                                                                                                                                        |
| GL207.5 | VACWR153.5     |                | A30.5L | 42aa short ORF, late promoter element in infected cells                                                                                                                                                                                                            |
| GL208   | VACWR154       | GI:335505      | A31R   | unknown                                                                                                                                                                                                                                                            |
| GL209   | VACWR155       | GI:335506      | A32L   | putative ATPase                                                                                                                                                                                                                                                    |
| GL211   | VACWR156       | GI:335508      | A33R   | EEV membrane phosphoglycoprotein                                                                                                                                                                                                                                   |
| GL212   | VACWR157       | GI:335509      | A34R   | EEV glycoprotein                                                                                                                                                                                                                                                   |
| GL213   | 144622..144392 | GI:335510      |        | similar to (COP) putative A ORF M                                                                                                                                                                                                                                  |
| GL214   | VACWR158       | GI:335511      | A35R   | intracellular protein of virulence                                                                                                                                                                                                                                 |
| GL215   | VACWR159       | GI:335512      | A36R   | IEV transmembrane phosphoprotein                                                                                                                                                                                                                                   |
| GL216   | VACWR160       | GI:335513      | A37R   | unknown                                                                                                                                                                                                                                                            |
| GL218   | VACWR161       | /              |        | unknown                                                                                                                                                                                                                                                            |
| GL220   | VACWR162       | GI:335516      | A38L   | CD47-like antigen/integrin association membrane protein                                                                                                                                                                                                            |
| GL221   | VACWR163*      | GI:335517      | A39R   | similar to putative A39R[COP]                                                                                                                                                                                                                                      |
|         | VACWR164*      |                |        | * frame shift mutation<br>semaphorin-like protein<br>* frame shift mutation                                                                                                                                                                                        |
| GL223   | VACWR165       | GI:335519      | A40R   | C-type lectin-like type-II membrane protein                                                                                                                                                                                                                        |
| GL224   | VACWR166       | GI:335520      | A41L   | secreted glycoprotein                                                                                                                                                                                                                                              |
| GL225   | VACWR167       | GI:335521      | A42R   | profilin-like protein                                                                                                                                                                                                                                              |
| GL226   | VACWR168       | GI:335522      | A43R   | putative type-I membrane glycoprotein                                                                                                                                                                                                                              |
| GL227   | VACWR169       |                |        | Unknown, with epitope hit ID:1086349,<br>*a frame shift mutation induces the generation of 268, bringing a novel stop codon in GL227 WR169, thus only the early 38aa (COP) of 78aa (WR, GLV-1h68) can be translated.<br>hypothetical protein, orthologous to m0215 |
| GL228   | VACWR170       | GI:335523      | A44L   | hydroxysteroid dehydrogenase                                                                                                                                                                                                                                       |
| GL229   | VACWR171       | GI:335524      | A45R   | Cu-Zn superoxide dismutase-like in virion, nonessential for replication or virulence                                                                                                                                                                               |
| GL230   | VACWR172       | GI:335525      | A46R   | Toll/IL1-receptor                                                                                                                                                                                                                                                  |
| GL232   | VACWR173       | GI:335527      | A47L   | Unknown protein                                                                                                                                                                                                                                                    |
| GL233*  | 154848..154711 | 153862..153683 |        | unknown, orthologous to unknown protein[monkeypox virus]                                                                                                                                                                                                           |

|             |                 |                |      |                                                                                                                                                                                                                                                                             |
|-------------|-----------------|----------------|------|-----------------------------------------------------------------------------------------------------------------------------------------------------------------------------------------------------------------------------------------------------------------------------|
|             |                 |                |      | * frame shift mutation at stop codon location in GLV-1h68, extends the ORF length (till new stop codon), coding a slightly longer protein (59aa) in comparison with (45aa protein) in WR and Copenhagen. Due to 76% coverage, it is considered as pseudo-strain-specific    |
| GL234       | VACWR174        | GI:335528      | A48R | thymidylate kinase                                                                                                                                                                                                                                                          |
| GL235       | VACWR175        | GI:335529      | A49R | unknown                                                                                                                                                                                                                                                                     |
| GL236       | VACWR176        | GI:335530      | A50R | DNA ligase                                                                                                                                                                                                                                                                  |
| GL239       | VACWR177        | GI:335533      | A51R | unknown protein                                                                                                                                                                                                                                                             |
| GL240       | VACWR178        | GI:335534      | A52R | Toll/IL1-receptor                                                                                                                                                                                                                                                           |
| /-          | 159729..159457  | GI:335535      | A54L | putative A54L, in GLV-1h68,<br>- original start codon and multiple nonsense mutations are involved in GLV-1h68 sequence, interrupting the ORF                                                                                                                               |
| GL241       | 159637..159882* | GI:335537*     | A53R | putative A ORF T,<br>* frame shift mutation in WR, GLV-1h68, sharing the early 25aa fragment of GL241(186aa)                                                                                                                                                                |
|             | VACWR179*       | GI:335536*     |      | secretory TNF-receptor-like protein, putative A53R; CrmC, intact in some VAC strains; host defence modulator, sharing the part sequence (coding: 34..84th aa) of region of GL241                                                                                            |
|             | /               | /              |      | * frame shift mutation<br>Tumor necrosis factor receptor[Vaccinia], 186aa intact in GLV-1h68                                                                                                                                                                                |
| GL243       | 160068..160247  | 159082..159258 |      | putative protein orthologous to CPXV192[Camelpox virus]                                                                                                                                                                                                                     |
| GL244       | VACWR180        | GI:335538      | A55R | kelch-like protein                                                                                                                                                                                                                                                          |
| GL245-      | VACWR181        | GI:335539      | A56R | hemagglutinin                                                                                                                                                                                                                                                               |
| <i>gusA</i> |                 |                |      | - fragmented by a foreign insertion, however in wt this ORF is intact<br><i>gusA: foreign insertion</i>                                                                                                                                                                     |
| /-          | /-              | GI:335540      |      | putative A ORF U,<br>- start codon mutation in WR  GLV-1h68, however, with another start codon, the rest sequence can be translated into a very short protein of (35aa), which is potentially a lack-of-function fragment of GI:335540 (72aa), thus we treat them as absent |
| GL245.5     | VACWR181.5      |                | 269  | Unknown protein                                                                                                                                                                                                                                                             |
| GL246       | VACWR182        | GI:335541      | A57R | guanylate kinase                                                                                                                                                                                                                                                            |
| GL247       | VACWR183        | GI:335542      | B1R  | ser/thr kinase                                                                                                                                                                                                                                                              |
| GL249       | VACWR184        | GI:335544      | B2R  | unknown                                                                                                                                                                                                                                                                     |
| GL251       | 165660..165373  | GI:335546      |      | similar to (COP) putative B ORF C                                                                                                                                                                                                                                           |
| GL252       | VACWR185        | GI:335547      | B3R  | unknown                                                                                                                                                                                                                                                                     |
| GL253       | /               | /              |      | unknown                                                                                                                                                                                                                                                                     |
| GL255       | VACWR186        | GI:335548      | B4R  | ankyrin-like protein                                                                                                                                                                                                                                                        |
| GL256       | VACWR187        | GI:335549      | B5R  | EEV type-I membrane glycoprotein                                                                                                                                                                                                                                            |



|                |                |                    |       |                                                                                                                                                                                                                                                                                                                                  |
|----------------|----------------|--------------------|-------|----------------------------------------------------------------------------------------------------------------------------------------------------------------------------------------------------------------------------------------------------------------------------------------------------------------------------------|
| GL257          | VACWR188       | GI:335550          | B6R   | ankyrin-like protein                                                                                                                                                                                                                                                                                                             |
| GL259          | VACWR189       | GI:335552          | B7R   | 21kDa precursor protein                                                                                                                                                                                                                                                                                                          |
| GL260          | VACWR190       | GI:335553          | B8R   | soluble interferon-gamma receptor-like protein                                                                                                                                                                                                                                                                                   |
| GL261          | 171634..171461 | 170657..170484     |       | Potential protein orthologous to RPXV171[Rabbitpox virus]                                                                                                                                                                                                                                                                        |
| GL262          | VACWR191       | GI:335554          | B9R   | 6kDa intracellular viral protein                                                                                                                                                                                                                                                                                                 |
| GL263          | VACWR192       | GI:335555          | B10R  | unknown kelch-like protein                                                                                                                                                                                                                                                                                                       |
| GL264          | VACWR193       | GI:335556          | B11R  | unknown                                                                                                                                                                                                                                                                                                                          |
| GL265          | VACWR194       | GI:335557          | B12R  | ser/thr protein kinase-like protein                                                                                                                                                                                                                                                                                              |
| GL266*         | VACWR195       | GI:335558*         | B13R  | SPI-2/CrmA inhibits Fas-mediated apoptosis, IL-1 convertase, lipoxygenase pathway * a frame shift mutation presents a new stop codon<br>SPI-2/CrmA inhibits Fas-mediated apoptosis, IL-1 convertase, lipoxygenase pathway * a frame shift mutation splits the ORF(WR195) into 2 fragments in GLV-1h68 COP, same in Lister strain |
| GL267*         |                | GI:335559*         | B14R  |                                                                                                                                                                                                                                                                                                                                  |
| GL268          | VACWR196       | GI:335560          | B15R  | IL-1 binding B15R protein                                                                                                                                                                                                                                                                                                        |
| GL270          | VACWR197       | GI:335562-<br>270- | B16R- | Extremely short (30aa), Immune Epitope Database hits, well conserved late promoter - nonsense mutation COP, forming a short ORF(30aa)<br>IL-1-beta-receptor<br>- non-sense mutation (forming 270), with a later start codon, the rest ORF may be translated.                                                                     |
| GL272          | VACWR198       | GI:335564          | B17L  | unknown protein                                                                                                                                                                                                                                                                                                                  |
| GL273          | VACWR199       | GI:335565          | B18R  | ankyrin-like protein                                                                                                                                                                                                                                                                                                             |
| GL274          | VACWR200       | GI:335566          | B19R  | IFN-alpha/beta-receptor-like secreted glycoprotein                                                                                                                                                                                                                                                                               |
| GL275          | VACWR202^      | GI:335567          | B20R  | similar to (COP) putative B20R,<br>^ nucleotide sequence changes near the start codon, using a later start codon, WR202(53aa) can be translated as the late fragment of GL275(139aa).                                                                                                                                            |
| /              | VACWR203       | /                  |       | unknown                                                                                                                                                                                                                                                                                                                          |
| /              | VACWR204       | /                  |       | unknown Kelch-like fragment                                                                                                                                                                                                                                                                                                      |
| GL277  015     | VACWR013       | /                  |       | interleukin18-binding protein, WR lacks the paralog duplicate of WR013                                                                                                                                                                                                                                                           |
| GL278  014     | VACWR207  012  | /                  |       | zinc finger-like protein                                                                                                                                                                                                                                                                                                         |
| GL279  013     | VACWR208  011  | /                  |       | zinc finger-like protein                                                                                                                                                                                                                                                                                                         |
| GL280  011     | VACWR209  010  | GI:335334          | C10L  | Fragment of IL-1 Ra (receptor antagonist)                                                                                                                                                                                                                                                                                        |
| GL282  010     | VACWR210  009  | GI:335333          | C11R  | secreted epidermal growth factor-like protein                                                                                                                                                                                                                                                                                    |
| GL282.5  009.5 | VACWR204.5     | 264                |       | unknown short ORF(37aa), very well conserved, ORF with well conserved putative late promoter and putative early promoter                                                                                                                                                                                                         |
| GL283  009     | VACWR205       | GI:335332          | C12L  | serine protease inhibitor-like SPI-1                                                                                                                                                                                                                                                                                             |
| /              | VACWR206       | GI:335330          | C14L  | putative C14L                                                                                                                                                                                                                                                                                                                    |
| /              |                | GI:335331          | C13L  | putative C13L                                                                                                                                                                                                                                                                                                                    |

|                          |                                 |                               |            |                                                                                                                                                                                                                                                                                                                                 |
|--------------------------|---------------------------------|-------------------------------|------------|---------------------------------------------------------------------------------------------------------------------------------------------------------------------------------------------------------------------------------------------------------------------------------------------------------------------------------|
| /                        | /                               | GI:335568  329                | B21R  C15L | putative B21R                                                                                                                                                                                                                                                                                                                   |
| /                        | /                               | GI:335569  328                | B22R  C16L | putative B22R                                                                                                                                                                                                                                                                                                                   |
| GL284  008<br>GL285  007 | /                               | GI:335570  327                | B23R  C17L | similar to (COP) putative C17L, putative host range polypeptide                                                                                                                                                                                                                                                                 |
| GL286  006*              | /                               | GI:335571  326                | B24R  C18L | Putative host range protein. GL286 is the early fragment (49aa) of C18L, B24R (150aa) * a frame shift mutation occurs                                                                                                                                                                                                           |
| GL287  005               | /                               | /                             |            | ankyrin-like protein                                                                                                                                                                                                                                                                                                            |
| /                        | 6914..7126*<br> 187798..187586* | GI:335572  325                |            | putative B ORF G<br>* a frame shift mutation at a later location (in a low complex region), causing the late 20 amino acids are totally novel, thus we consider them as pseudo-strain-specific due to the lower orthology                                                                                                       |
| /                        | VACWR211  008*                  | GI:335573  324                | B25R  C19L | putative B25R, ankyrin-like protein,<br>*- a frame shift mutation induced an early end and with a different start codon, 103aa of (112aa in WR008) are identical with B25R (259aa in COP)                                                                                                                                       |
| /                        | VACWR212  007                   | GI:335574  323                | B26R  C20L | putative B26R                                                                                                                                                                                                                                                                                                                   |
| /                        | VACWR213  006                   | GI:335575  322                | B27R  C21L | putative B27R                                                                                                                                                                                                                                                                                                                   |
| GL287.5  004.5           | VACWR214  005                   | 6377..6231<br> 185361..185507 |            | ankyrin-like protein                                                                                                                                                                                                                                                                                                            |
| GL288  004               | VACWR215  004                   | GI:335576  321                | B28R  C22L | TNF-alpha-receptor-like protein                                                                                                                                                                                                                                                                                                 |
| /*                       | VACWR216  003*                  | /*                            |            | Unknown protein (gene fragment)<br>* a frame shift mutation in GLV-1h68 COP, the original ORF is completely disrupted in COP and GLV-1h68                                                                                                                                                                                       |
| /*                       | VACWR217  002                   | /*                            |            | TNF-alpha-receptor-like protein<br>* a frame shift mutation in GLV-1h68 COP                                                                                                                                                                                                                                                     |
| GL289  003*              | 4714..4556<br> 189998..190156   | 5347..5189<br> 186391..186549 |            | Tumor necrosis factor receptor fragment<br>* a frame shift mutation in GLV-1h68, leads to a longer ORF(63aa) in GLV-1h68 than (52aa) in WR(4714..4524, 189998..190188)  COP (5347..5157, 186391..186581). The alignment identity is relatively high, so that we have to assume they are pseudo specific due to their orthology. |
| GL290  001               | VACWR218  001                   | GI:335577  318                | B29R  C23L | chemokine-binding protein                                                                                                                                                                                                                                                                                                       |

**Table S1. Major ORFs**

/ no ortholog present in a certain strain

\* frame-shift mutations

- non-sense mutations, start codon mutation

^ sequence insertions, deletion and rearrangement events in larger scale

Italic locus\_tag denotes the foreign gene insertions, in comparison with LIVPwt.



## Minor ORFs

| GLV-1h68   | WR                            | COP            | Annotation                                                                                                                                                  |
|------------|-------------------------------|----------------|-------------------------------------------------------------------------------------------------------------------------------------------------------------|
| GL002  291 | 3857..4060<br> 190855..190652 | GI:335319  579 | similar to putative C ORF H[COP]                                                                                                                            |
| GL012  281 | 8700..8879<br> 186012..185815 | GI:335335      | putative C ORF E                                                                                                                                            |
| GL039      | 26534..26779                  | GI:335355      | similar to putative K ORF A[COP]                                                                                                                            |
| GL040      | 26664..26903-                 | GI:335356-     | similar to putative K ORF B[COP]<br>- start codon mutation, in WR at 26601, in COP at 29658 ATG->ATA                                                        |
| GL022      | 14662..14874                  | GI:335337      | similar to putative C ORF D[COP]                                                                                                                            |
| GL024      | 15294..15518                  | GI:335340-     | similar to putative C ORF B[COP],<br>- nonsense mutation at 18578 in COP, shortening the translation product in comparison to WR, however still orthologous |
| GL048      | 30110..29916                  | 33181..32987   | hypothetical protein, orthologous to m0043L                                                                                                                 |
| GL052      | 31866..32069                  | GI:335365      | similar to (COP) putative F ORF A                                                                                                                           |
| GL054      | 33229..33465                  | GI:335367      | similar to (COP) putative F ORF B                                                                                                                           |
| GL055      | 33477..33767                  | GI:335368      | similar to (COP) putative F ORF C                                                                                                                           |
| GL065      | 39572..39787                  | GI:335378      | similar to (COP) putative F ORF E                                                                                                                           |
| GL072      | 43949..43737                  | GI:335385      | similar to (COP) putative E ORF A                                                                                                                           |
| GL078      | 50113..49793                  | GI:335391      | similar to (COP) putative E ORF B                                                                                                                           |
| GL081      | 52616..52404                  | GI:335394      | similar to (COP) putative E ORF C                                                                                                                           |
| GL083      | 53208..53008                  | GI:335396      | similar to (COP) putative E ORF D                                                                                                                           |
| GL085      | 56234..56431                  | GI:335398      | similar to (COP) putative E ORF E                                                                                                                           |
| GL089      | 58064..58411                  | GI:335402      | similar to (COP) putative E ORF F                                                                                                                           |
| GL096      | 62750..62983                  | GI:335408      | similar to (COP) putative I ORF A                                                                                                                           |
| GL097      | 63272..63436                  | 66403..66567   | putative protein, orthologous to CMP70.56R[Camelpox]                                                                                                        |
| GL110      | 74184..74582                  | GI:335420      | similar to (COP) putative G ORF A                                                                                                                           |
| GL126      | 86543..86328                  | GI:335435      | similar to (COP) putative H ORF A                                                                                                                           |
| GL136      | 96412..96158                  | GI:335444      | hypothetical protein                                                                                                                                        |
| GL138      | 96496..96738                  | GI:335446      | similar to (COP) putative D ORF B                                                                                                                           |
| GL143      | 100076..99858                 | GI:335451      | similar to (COP) putative D ORF D                                                                                                                           |
| GL144      | 100610..100368                | GI:335452      | similar to (COP) putative D ORF E                                                                                                                           |
| GL146      | 101751..101560                | 104896..104705 | Hypothetical protein                                                                                                                                        |
| GL152      | 105919..106128                | GI:335459      | similar to (COP) putative D ORF F                                                                                                                           |

|       |                 |                |                                                                                                                                                                                           |
|-------|-----------------|----------------|-------------------------------------------------------------------------------------------------------------------------------------------------------------------------------------------|
| GL153 | 106711..106869  | GI:335460      | similar to (COP) putative D ORF G                                                                                                                                                         |
| GL154 | 106866..107051  | 110011..110196 | hypothetical 7.2KDa protein                                                                                                                                                               |
| GL156 | 107612..107880  | 110757..110945 | hypothetical 7.0KDa protein                                                                                                                                                               |
| GL159 | /-              | GI:335463      | similar to (COP) putative D ORF I;<br>- in WR, an early nonsense mutation disrupted it-                                                                                                   |
| GL164 | 111873..112232  | GI:335467      | similar to (COP) putative A ORF A                                                                                                                                                         |
| GL166 | 113711..113451  | GI:335469      | Hypothetical protein orthologous to unknown protein [Tian tan]<br>putative A ORF B [COP]                                                                                                  |
| GL170 | 116881..117267  | GI:335473      | similar to (COP) putative A ORF C                                                                                                                                                         |
| GL171 | 117349..117615- | GI:335473-     | similar to (COP) putative A ORF D,<br>- in WR, Cop, an early nonsense mutation induces the protein shorter (88aa) than which in GLV-1h68 (101aa)                                          |
| GL175 | 119512..120012  | GI:335478      | similar to (COP) putative A ORF E                                                                                                                                                         |
| GL176 | 120394..120621  | GI:335479      | similar to (COP) putative A ORF F                                                                                                                                                         |
| GL177 | 120888..121115  | GI:335480      | similar to (COP) putative A ORF G                                                                                                                                                         |
| GL190 | 129077..128691  | GI:335492      | similar to (COP) putative A ORF H, orthologs in WR, COP are shorter than which in GLV-1h68 with a later start codon                                                                       |
| GL191 | 129380..129159  | GI:335493      | similar to (COP) putative A ORF I                                                                                                                                                         |
| GL195 | 134079..133858  | GI:335497      | putative A ORF J(COP)                                                                                                                                                                     |
| GL198 | 135723..135896  | /              | unknown, orthologous to TAZ8R[Tian tan]                                                                                                                                                   |
| GL200 | 137325..137471  | /              | hypothetical protein                                                                                                                                                                      |
| GL202 | 138689..139183  | /              | Hypothetical protein                                                                                                                                                                      |
| GL210 | 142522..142788  | GI:335507      | putative A ORF L                                                                                                                                                                          |
| GL217 | 146560..146309  | GI:335515      | similar to (COP) putative A ORF O                                                                                                                                                         |
| /-    | 146086..145874  | GI:335514      | putative A ORF N, in GLV-1h68,<br>- nonsense mutation occurs at 155201, however, which may translate a 33aa fragment (145303..145202) instead of 70aa protein in COP                      |
| GL219 | 146851..146675  | 145842..145660 | Unknown protein                                                                                                                                                                           |
| GL222 | 148736..148467  | GI:335518      | similar to (COP) putative A ORF P<br>putative A ORF Q                                                                                                                                     |
| GL231 | 153790..153473  | GI:335526*     | * frame shift mutation at 152700 in Cop, using another start codon, the corresponding product is shorter (77aa) than WR, GLV-1h68 (105aa)                                                 |
| GL237 | 156827..156627  | GI:335531      | similar to (COP) putative A ORF R                                                                                                                                                         |
| GL238 | 156946..156745  | GI:335532      | similar to (COP) putative A ORF S                                                                                                                                                         |
| GL242 | /-              | /-             | putative protein orthologous to CMP170.5L[Camelpox],<br>- in WR, COP, start codon and nonsense mutation both shorten the translation product, we consider it has no ortholog in WR or COP |
| GL248 | 164701..164378  | GI:335543      | similar to (COP) putative B ORF A                                                                                                                                                         |

|            |                               |                |                                                                                                               |
|------------|-------------------------------|----------------|---------------------------------------------------------------------------------------------------------------|
| GL250      | 165397..165197                | GI:335545      | similar to (COP) putative B ORF B                                                                             |
| GL254      | 166151..166002                | 165158..165009 | unknown protein, weakly orthologous to B5L[Variola]                                                           |
| GL258      | 169686..169471                | GI:335551      | similar to (COP) putative B ORF D                                                                             |
| GL269-     | 175046..174771                | GI:335561      | similar to (COP) putative B ORF E<br>- with a different start codon, the ORF is shorter than which in WR, COP |
| GL271      | 175659..175432                | GI:335563      | similar to (COP) putative B ORF F                                                                             |
| GL276      | <u>VACWR201#</u>              | 179400..179570 | Unknown protein                                                                                               |
| GL281  012 | 8700..8897<br> 186012..185815 | GI:335335      | similar to (COP) putative C ORF E                                                                             |
| /-         | /-                            | GI:335578      | putative B ORF H<br>- in GLV-1h68, WR, due to a nonsense mutation, the corresponding genes were disrupted-    |
| GL291  002 | 3857..4060<br> 190855..190652 | GI:335579  319 | similar to (COP) putative B ORF I; C ORF H                                                                    |

**Table S2. Minor ORFs**

VACWR201 is not a significant minor ORF, since it is only slightly overlapped with a major ORF, however its orthologs (GL276, COP: 179400..179570) in GLV-1h68 and COP are both minor ORFs, we specially classified WR201 into minor group. Further investigation reveals the mutation event leads to this difference, which is located on its major ORF (WR202), shortens the corresponding ORF size.

| No.        | Len | Locus_tag | Annotation                       | Description                                                                                    |
|------------|-----|-----------|----------------------------------|------------------------------------------------------------------------------------------------|
| Major ORFs |     |           |                                  |                                                                                                |
| 1)         | 48  | GL004.5   | ankyrin-like protein             |                                                                                                |
| 2)         | 49  | GL006     | fragment of putative C18L, B24R  | Only early 40aa fragment present, induced by a frame shift mutation                            |
| 3)         | 37  | GL009.5   | Unknown protein                  | very short ORF well conserved putative early and late promoter                                 |
| 4)         | 45  | GL023.5   | unknown protein                  |                                                                                                |
| 5)         | 44  | GL044     | putative monoglyceride lipase    |                                                                                                |
| 6)         | 49  | GL068*    | hypothetical protein             | orthologous to m0062L, WR53.5, F14.5L, epitope: 1072792                                        |
| 7)         | 35  | GL091.5   | extremely short, unknown protein | with well conserved putative early and late promoter                                           |
| 8)         | 42  | GL207.5   | unknown protein                  | 42aa, late promoter element in transfected and infected cells, viral replication and packaging |
| 9)         | 37  | GL245.5   | unknown protein                  |                                                                                                |
| 10)        | 37  | GL282.5   | very short ORF                   | well conserved putative early and late promoter                                                |
| 11)        | 49  | GL286     | fragment putative C18L, B24R     | Early 40aa fragment, induced by a frame shift mutation, Paralog of GL006                       |
| 12)        | 48  | GL287.5   | ankyrin-like protein             | Paralog of GL004.5                                                                             |
| Minor ORF  |     |           |                                  |                                                                                                |
| 13)        | 49  | GL254     | unknown protein                  | weakly orthologous to B5L[Variola virus]                                                       |

**Table S3. Short ORFs present in GLV-1h68, defined by the coding protein length are shorter than 50 amino acids**

\* GL068 is recovered by removing the foreign insertion of Ruc-GFP, which is intact within its parental LIVPwt strain.

| GLV-1h68       | WR                              | COP                            | ANNOTATION                                                    |
|----------------|---------------------------------|--------------------------------|---------------------------------------------------------------|
| /              | /                               | C ORF G                        | putative C ORF G                                              |
| GL003  289*    | 4714..4556  <br>189998..190156  | 5347..5189  <br>186391..186549 | fragment of tumor necrosis factor receptor, * pseudo-specific |
| /*             | WR002  217                      | /*                             | TNF-alpha-receptor-like protein                               |
| /*             | WR003  216                      | /*                             | Unknown protein (gene fragment)                               |
| /              | WR006  213                      | C21L  B27R                     | putative C21L, ankyrin-like protein                           |
| /              | WR007  212                      | C20L  B26R                     | putative C20L, ankyrin-like protein                           |
| /              | WR008  211*-                    | C19L  B25R                     | putative C19L ankyrin-like protein                            |
| /              | 6914..7126*<br> 187798..187586* | C ORF F  <br>B ORF G           | putative C ORF F, B ORF G                                     |
| GL005  287     | /                               | /                              | ankyrin-like protein                                          |
| GL006  286*    | /                               | C18L  B24R                     | putative; host range protein                                  |
| GL007  285*    | /                               | C17L  B23R                     | fragment of putative C17L, putative host range polypeptide    |
| GL008  284*    | /                               | C16L  B22R                     | putative C16L                                                 |
| /              | /                               | C15L  B21R                     | putative C15L                                                 |
| GL009  283     | WR205                           | C12L                           | serine protease inhibitor-like SPI-1                          |
| GL009.5  282.5 | WR204.5                         | 264                            | very short, well conserved putative early and late promoter   |
| GL010  282     | WR009  210                      | C11R                           | secreted epidermal growth factor                              |
| GL011  280     | WR010  209                      | C10L                           | Fragment of IL-1 Ra (receptor antagonist)                     |
| GL013  279     | WR011  208                      | /                              | zinc finger-like protein                                      |
| GL014  278     | WR012  207                      | /                              | zinc finger-like protein                                      |
| GL015  277     | WR013                           | /                              | interleukin-18-binding protein, no paralog in WR              |
| GL016-         | WR014                           | /                              | ankyrin-like protein, - nonsense mutation                     |
| GL017-         | WR014                           | /                              | ankyrin-like protein, - with another start codon              |
| GL018          | WR015                           | /                              | ankyrin-like protein                                          |
| GL019          | WR016*                          | /                              | ankyrin-like protein                                          |
|                | WR017*                          | /                              | ankyrin-like protein                                          |
| /              | WR018                           | /                              | Unknown                                                       |
| GL020          | /                               | /                              | unknown, orthologous to TC10L[Tian tan]                       |
| GL023.5-       | 15121..15369                    | C ORF C                        | - nonsense mutation inducing a 45aa protein                   |
| /              |                                 |                                | putative C ORF C,                                             |
| GL041*         | 27312..27491                    | 30369..30554                   | hypothetical protein                                          |
| /*             | /*                              | F ORF F                        | putative F ORF F                                              |
| GL120-         | WR094                           | J2R                            | thymidine kinase (TK)                                         |
| GL121-         |                                 |                                | - fragmented by a nonsense mutation                           |



|        |                                 |                      |                                                                                                           |
|--------|---------------------------------|----------------------|-----------------------------------------------------------------------------------------------------------|
| GL196  | WR145*<br>WR146*                | A25L                 | Cowpox A-type inclusion protein                                                                           |
| GL197  | WR147                           | /                    | Cowpox A-type inclusion protein                                                                           |
| GL199  | WR148                           | /                    | Cowpox A-type inclusion protein                                                                           |
| /      | /                               | A26L                 | Putative protein                                                                                          |
| GL201  | WR149                           | /                    | Cowpox A-type inclusion protein                                                                           |
| GL218  | WR161                           | /                    | unknown                                                                                                   |
| GL221  | WR163*<br>WR164*                | A39R                 | similar to (COP) putative A39R<br>semaphorin-like protein                                                 |
| GL227  | WR169                           | 268*<br>/            | Unknown, with epitope hit ID:1086349<br>hypothetical protein, orthologous to m0215[Vac]                   |
| GL233* | 154848..154711                  | 153862..153683       | orthologous to unknown protein[monkeypox]                                                                 |
| /-     | 159729..159457                  | A54L                 | putative A54L                                                                                             |
| GL241  | 159637..159882*                 | A ORF T*             | putative A ORF T                                                                                          |
|        | WR179*                          | A53R                 | secreted TNF-receptor-like protein, putative A53R; CrmC, host defence modulator                           |
| /-     | /                               | /                    | Tumor necrosis factor receptor                                                                            |
| /-     | /-                              | A ORF U              | putative A ORF U                                                                                          |
| GL253  | /                               | /                    | Unknown                                                                                                   |
| GL266* | WR195                           | B13R*                | SPI-2/CrmA inhibits Fas-mediated apoptosis, IL-1 convertase, lipoxigenase pathway                         |
| GL267* |                                 | B14R*                |                                                                                                           |
| GL270  | WR197                           | 270-<br>B16R-        | Extremely short (30aa), Immune Epitope Database hits, well conserved late promoter<br>IL-1-beta-inhibitor |
| GL275  | /<br>WR202^                     | B20R                 | similar to (COP) putative B20R,<br>^(sequence changing) loses start codon, WR202 is shorter               |
| /      | WR203                           | /                    | Unknown protein                                                                                           |
| /      | WR204                           | /                    | Kelch-like fragment, unknown protein                                                                      |
| /      | WR206                           | C14L                 | putative C14L                                                                                             |
|        |                                 | C13L                 | putative C13L                                                                                             |
| /      | /                               | B21R  C15L           | putative B21R                                                                                             |
| /      | /                               | B22R  C16L           | putative B22R                                                                                             |
| /      | 6914..7126*<br> 187798..187586* | B ORF G   C<br>ORF F | putative B ORF G                                                                                          |
| /      | WR211  008*                     | B25R  C19L           | putative B25R, ankyrin-like protein                                                                       |
| /      | WR212  007                      | B26R  C20L           | putative B26R                                                                                             |
| /      | WR213  006                      | B27R  C21L           | putative B27R                                                                                             |
| /*     | WR216  003                      | /*                   | Unknown protein (gene fragment)                                                                           |
| /*     | WR217  002                      | /*                   | TNF-alpha-receptor-like protein                                                                           |

**Table S4. Major differences in the ORFs among GLV-1h68, WR and Copenhagen**

\*: frame shift mutation interfering the ORF

-: non-sense mutation

/: no corresponding orthologs present in the genome

| ORF summary  |          |                 |            |
|--------------|----------|-----------------|------------|
| ORF category | GLV-1h68 | Western Reserve | Copenhagen |
| Major ORF    | 238*     | 244             | 236        |
| Minor ORF    | 61       | 60              | 59         |
| <b>Total</b> | 299      | 304             | 295        |

**Table S5. Summary of the major, minor ORF number of different vaccinia strains (GLV-1h68, WR and COP).**  
 Three foreign insertion genes are not counted, whereas the recovered gene (GL068) by eliminating those insertions has been taken account of.

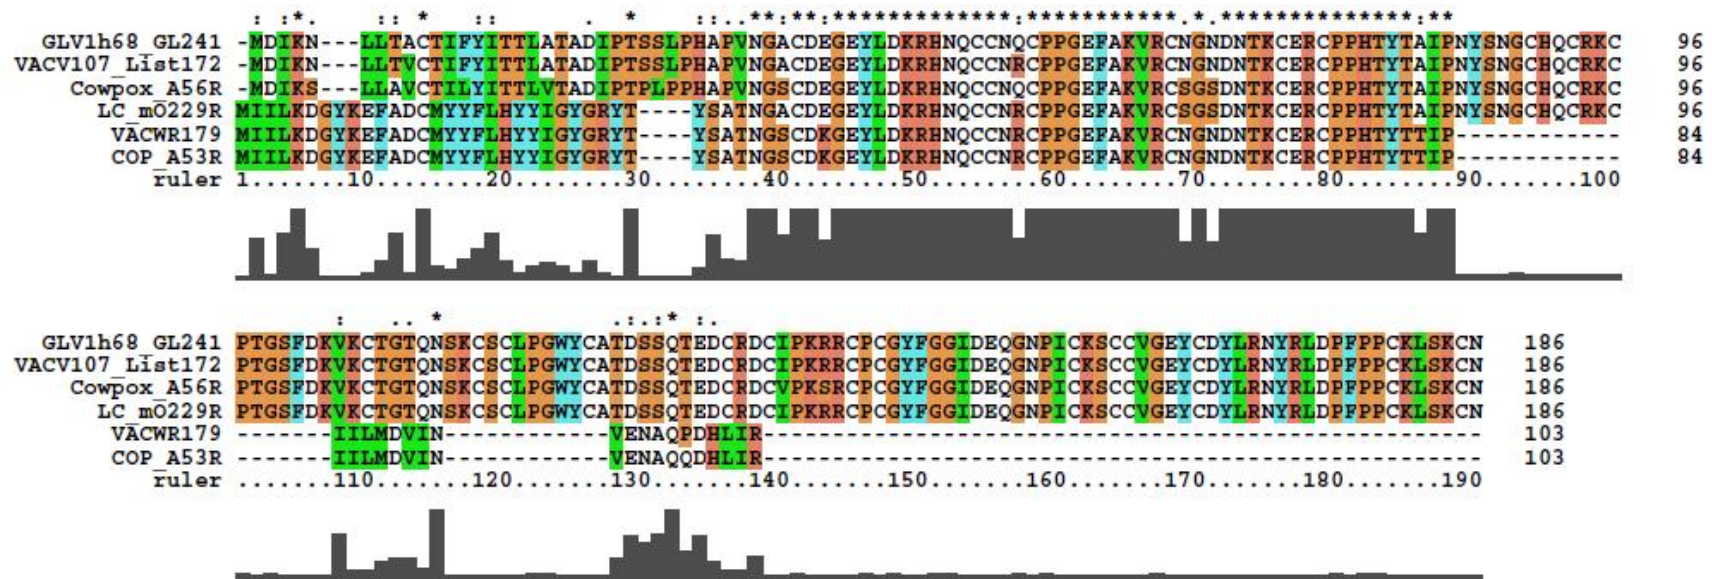

**Figure S1. Sequence alignment of *crmC* gene for selected poxvirus strains.** The ORFs for *crmC* in selected poxvirus strains were translated into amino acids and their sequences were aligned using ClustalX. GLV-1h68 exhibits an intact *crmC* gene (GL241), which is highly identical to List172 in Lister isolate VACV107, and A56 gene in Cowpox virus, all of which contain a typical signal peptide sequence predicted by SignalP 3 software. Lister strain LC16mO seems to have a full length protein, but its N-terminal sequence suggests that this protein is not secreted. The *crmC* genes in VACV strains Copenhagen and WR are truncated.

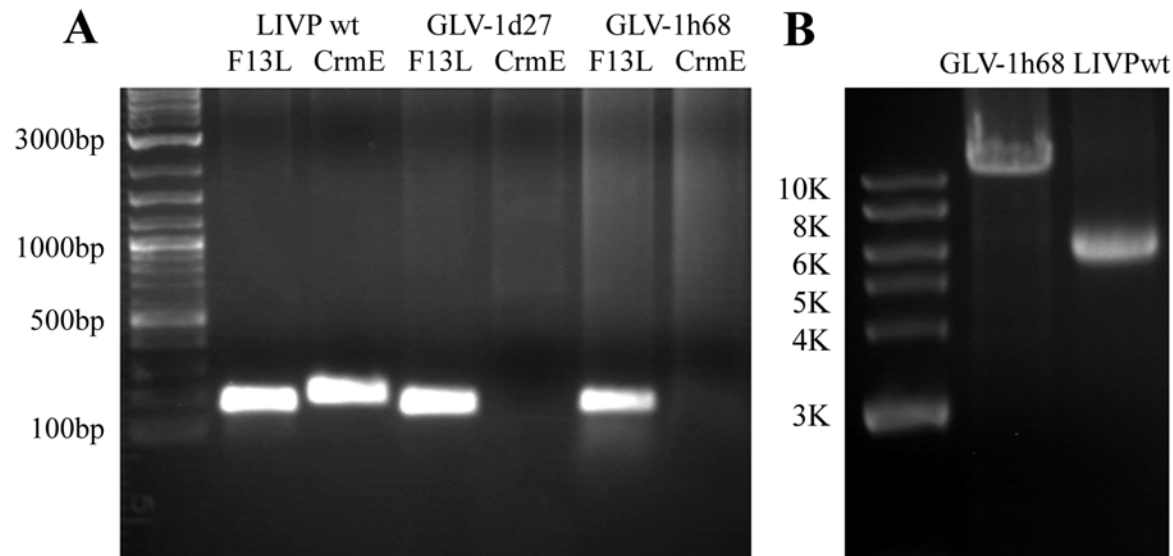

**Figure S2. The PCR results indicate the parental strain of GLV-1h68 is a unique isolate from LIVP.** (A) The genomic DNAs from LIVP wt, GLV-1d27 (the parental strain of GLV-1h68), and GLV-1h68 viruses were used as the templates for PCR amplification of the specific *CrmE* gene fragment and the conserved F13L gene fragment. The primer sequences for *crmE* were 5'-GTCCGAGTGACACATTCACG-3', and 5'-ACCCACGACCACATTTGTT-3', corresponding to the *crmE* gene (mO259R) 181,487..181,506 and 181,677..181,696, respectively, in *Listeria* isolate LC16mO (accession number AY678277). The primer sequences for F13L, serving as the positive control, were 5'-CGCGTCATTTACTGGAGGAT-3' and 5'-GCAGTGCTAACTGGCAAACA-3', corresponding to 40,770..40,789 and 40,613..40,632 respectively in the GLV-1h68 genome sequence, or 44,171..44,190 and 44,014..44,033 respectively in the LC16mO genome sequence. The PCR results indicate that while LIVP wild type population was *CrmE* positive, GLV-1d27 and GLV-1h68 were not. (B) The genomic DNAs from LIVP wt and GLV-1h68 were used as the templates for PCR with primer 5'-GCTATGATTA ACTCCACGATACTATGC-3', corresponding to 178,812..178,839 (mO257L) in LC16mO or 188,293..188,320 (GL272) in GLV-1h68, and primer 5'-CCTTACGACGTTTACATCGACGAG-3', corresponding to 184,655..185,678 (mORTRO2R) in LC16mO or 199,241..199,264 (GL285) in GLV-1h68. The PCR product for GLV-1h68 was 10,971 bps as predicted. The PCR product for LIVP wt was much smaller, similar to the size predicted for LC16mO (5,866 bps), further confirming that GLV-1h68 was derived from a unique isolate of LIVP (a derivative of *Listeria* strain).

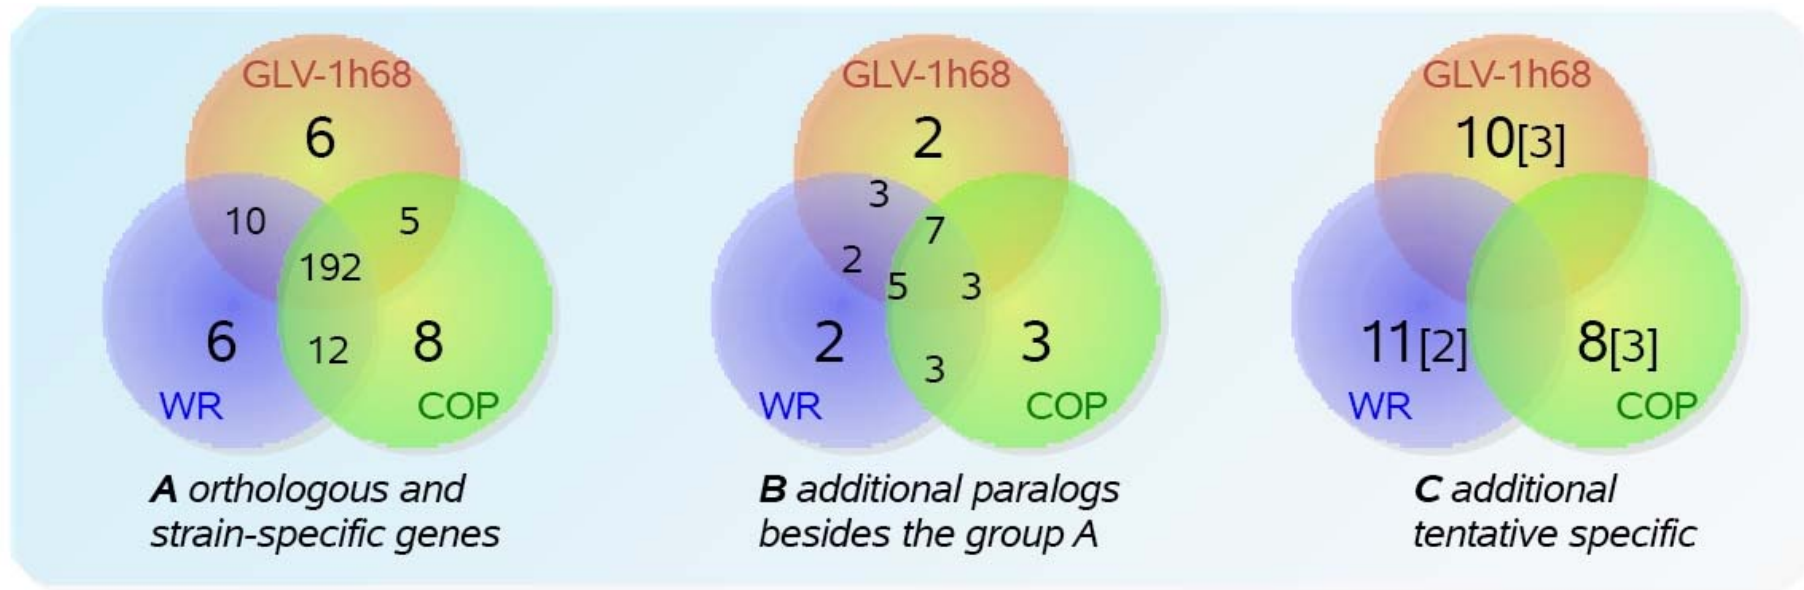

**Fig. S3. Orthologous and strain-specific major genes among GLV-1h68, WR and COP.** The three foreign insertion segments in GLV-1h68 were deleted before the genome comparison. Only major non-overlapping ORFs were counted. A red circle in the Venn diagram represents the ORFs in GLV-1h68, blue in WR and green in COP. **(A)** The orthologs shared by two or three VACV strains are indicated, with the central 192 ORFs highly conserved, which may be genes involved in basic vaccinia viral and survival functions. The numbers in bold specify putative virus strain-specific genes in comparison to the other two VACV strains. In addition, there were 10 ORFs shared only by GLV-1h68 and WR, 12 shared only by WR and COP, and 5 shared only by GLV-1h68 and COP. **(B)** The paralogs in addition to the orthologs and strain-specific genes were counted, including 7 in GLV-1h68, 5 in WR and 3 in COP. **(C)** Genes of low orthology were counted as tentative specific genes. These genes still have above 50% alignment coverage or are fragmented into two in-frame ORFs. Numbers in square brackets represent the number of additional paralogs to those tentative specific genes.

**List S1. Prosite protein motif hits:** The translated protein sequence were analysed with a local Prosite program, the result is reorganized in the following list.

---

- >GL001 | [gene=GL001] [protein=chemokine-binding protein] | PS00001 ASN\_GLYCOSYLATION N-glycosylation site. | PS00006 CK2\_PHOSPHO\_SITE Casein kinase II phosphorylation site.  
 | PS00004 CAMP\_PHOSPHO\_SITE cAMP- and cGMP-dependent protein kinase phosphorylation site. | PS00007 TYR\_PHOSPHO\_SITE Tyrosine kinase phosphorylation site.  
 | PS00008 MYRISTYL N-myristoylation site.  
 | PS00022 EGF\_1 EGF-like domain signature 1.  
 | PS01186 EGF\_2 EGF-like domain signature 2.  
 | PS50026 EGF\_3 EGF-like domain profile.
- >GL011 | [gene=GL011] [protein=fragment of IL-1Ra (receptor antagonist), C10L] | PS00001 ASN\_GLYCOSYLATION N-glycosylation site. | PS00004 CAMP\_PHOSPHO\_SITE cAMP- and cGMP-dependent protein kinase phosphorylation site.  
 | PS00005 PKC\_PHOSPHO\_SITE Protein kinase C phosphorylation site. | PS00006 CK2\_PHOSPHO\_SITE Casein kinase II phosphorylation site.  
 | PS00007 TYR\_PHOSPHO\_SITE Tyrosine kinase phosphorylation site.  
 | PS00008 MYRISTYL N-myristoylation site.  
 | PS00009 AMIDATION Amidation site.
- >GL002 | [gene=GL002] [protein=similar to putative C ORF H] | PS00005 PKC\_PHOSPHO\_SITE Protein kinase C phosphorylation site. | PS00006 CK2\_PHOSPHO\_SITE Casein kinase II phosphorylation site.  
 | PS00008 MYRISTYL N-myristoylation site.
- >GL003 | [gene=GL003] [protein=fragment of Tumor necrosis factor receptor ] | PS00005 PKC\_PHOSPHO\_SITE Protein kinase C phosphorylation site. | PS00007 TYR\_PHOSPHO\_SITE Tyrosine kinase phosphorylation site.  
 | PS00008 MYRISTYL N-myristoylation site.
- >GL004 | [gene=GL004] [protein=TNF-alpha-receptor-like] | PS00005 PKC\_PHOSPHO\_SITE Protein kinase C phosphorylation site. | PS00007 TYR\_PHOSPHO\_SITE Tyrosine kinase phosphorylation site.  
 | PS00008 MYRISTYL N-myristoylation site. | PS00009 AMIDATION Amidation site.
- >GL004.5 | [gene=GL004.5] [protein=ankyrin-like protein]
- >GL005 | [gene=GL005] [protein=ankyrin-like protein] | PS00001 ASN\_GLYCOSYLATION N-glycosylation site. | PS00005 PKC\_PHOSPHO\_SITE Protein kinase C phosphorylation site.
- >GL006 | [gene=GL006] [protein=similar to putative C18L] | PS00001 ASN\_GLYCOSYLATION N-glycosylation site. | PS00008 MYRISTYL N-myristoylation site.
- >GL007 | [gene=GL007] [protein=putative host range polypeptide, similar to putative C17L] | PS00001 ASN\_GLYCOSYLATION N-glycosylation site. | PS00004 CAMP\_PHOSPHO\_SITE cAMP- and cGMP-dependent protein kinase phosphorylation site.  
 | PS00005 PKC\_PHOSPHO\_SITE Protein kinase C phosphorylation site. | PS00006 CK2\_PHOSPHO\_SITE Casein kinase II phosphorylation site.  
 | PS00008 MYRISTYL N-myristoylation site.
- >GL008 | [gene=GL008] [protein=similar to putative C17L ] | PS00001 ASN\_GLYCOSYLATION N-glycosylation site. | PS00005 PKC\_PHOSPHO\_SITE Protein kinase C phosphorylation site.  
 | PS00007 TYR\_PHOSPHO\_SITE Tyrosine kinase phosphorylation site. | PS00008 MYRISTYL N-myristoylation site.
- >GL009 | [gene=GL009] [protein=serine protease inhibitor-like SPI-1] | PS00001 ASN\_GLYCOSYLATION N-glycosylation site. | PS00005 PKC\_PHOSPHO\_SITE Protein kinase C phosphorylation site.  
 | PS00006 CK2\_PHOSPHO\_SITE Casein kinase II phosphorylation site. | PS00008 MYRISTYL N-myristoylation site.  
 | PS00284 SERPIN Serpins signature.
- >GL009.5 | [gene=GL009.5] [protein=very short ORF, well conserved putative early and late promoter] | PS00001 ASN\_GLYCOSYLATION N-glycosylation site. | PS00005 PKC\_PHOSPHO\_SITE Protein kinase C phosphorylation site.
- >GL010 | [gene=GL010] [protein=secreted epidermal growth factor-like] | PS00001 ASN\_GLYCOSYLATION N-glycosylation site. | PS00005 PKC\_PHOSPHO\_SITE Protein kinase C phosphorylation site.
- PS00006 CK2\_PHOSPHO\_SITE Casein kinase II phosphorylation site.  
 PS00007 TYR\_PHOSPHO\_SITE Tyrosine kinase phosphorylation site.  
 PS00008 MYRISTYL N-myristoylation site.
- >GL012 | [gene=GL012] [protein=similar to putative C ORF E] | PS00001 ASN\_GLYCOSYLATION N-glycosylation site.
- >GL013 | [gene=GL013] [protein=zinc finger-like protein] | PS00001 ASN\_GLYCOSYLATION N-glycosylation site. | PS00005 PKC\_PHOSPHO\_SITE Protein kinase C phosphorylation site.  
 | PS00008 MYRISTYL N-myristoylation site. | PS51301 KILA\_N KILA-N domain profile.
- >GL014 | [gene=GL014] [protein=zinc finger-like protein] | PS00001 ASN\_GLYCOSYLATION N-glycosylation site. | PS00004 CAMP\_PHOSPHO\_SITE cAMP- and cGMP-dependent protein kinase phosphorylation site.  
 | PS00005 PKC\_PHOSPHO\_SITE Protein kinase C phosphorylation site. | PS00006 CK2\_PHOSPHO\_SITE Casein kinase II phosphorylation site.  
 | PS00008 MYRISTYL N-myristoylation site. | PS00518 ZF\_RING\_1 Zinc finger RING-type signature.  
 | PS50089 ZF\_RING\_2 Zinc finger RING-type profile.
- >GL015 | [gene=GL015] [protein=interleukin-18-binding protein] | PS00005 PKC\_PHOSPHO\_SITE Protein kinase C phosphorylation site. | PS00006 CK2\_PHOSPHO\_SITE Casein kinase II phosphorylation site.  
 | PS00008 MYRISTYL N-myristoylation site.
- >GL016 | [gene=GL016] [protein=ankyrin-like protein] | PS00005 PKC\_PHOSPHO\_SITE Protein kinase C phosphorylation site. | PS00006 CK2\_PHOSPHO\_SITE Casein kinase II phosphorylation site.
- >GL017 | [gene=GL017] [protein=ankyrin-like protein] | PS00001 ASN\_GLYCOSYLATION N-glycosylation site. | PS00005 PKC\_PHOSPHO\_SITE Protein kinase C phosphorylation site.  
 | PS00006 CK2\_PHOSPHO\_SITE Casein kinase II phosphorylation site. | PS00007 TYR\_PHOSPHO\_SITE Tyrosine kinase phosphorylation site.  
 | PS00008 MYRISTYL N-myristoylation site. | PS50088 ANK\_REPEAT Ankyrin repeat profile.  
 | PS50297 ANK\_REP\_REGION Ankyrin repeat region circular profile.
- >GL018 | [gene=GL018] [protein=ankyrin-like protein] | PS00005 PKC\_PHOSPHO\_SITE Protein kinase C phosphorylation site. | PS00006 CK2\_PHOSPHO\_SITE Casein kinase II phosphorylation site.  
 | PS00007 TYR\_PHOSPHO\_SITE Tyrosine kinase phosphorylation site. | PS00008 MYRISTYL N-myristoylation site.

>GL019 | [gene=GL019] [protein=ankyrin-like protein]  
 | PS00001 ASN\_GLYCOSYLATION N-glycosylation site.  
 | PS00005 PKC\_PHOSPHO\_SITE Protein kinase C phosphorylation site.  
 | PS00006 CK2\_PHOSPHO\_SITE Casein kinase II phosphorylation site.

>GL020 | [gene=GL020] [protein=unknown, orthologous to TC10L]  
 | PS00005 PKC\_PHOSPHO\_SITE Protein kinase C phosphorylation site.  
 | PS00008 MYRISTYL N-myristoylation site.  
 | PS50315 GLY\_RICH Glycine-rich region profile.  
 | PS00342 MICROBODIES\_CTER Microbodies C-terminal targeting signal.

>GL021 | [gene=GL021] [protein=ankyrin-like protein]  
 | PS00001 ASN\_GLYCOSYLATION N-glycosylation site.  
 | PS00004 CAMP\_PHOSPHO\_SITE cAMP- and cGMP-dependent protein kinase phosphorylation site.  
 | PS00005 PKC\_PHOSPHO\_SITE Protein kinase C phosphorylation site.  
 | PS00006 CK2\_PHOSPHO\_SITE Casein kinase II phosphorylation site.  
 | PS00008 MYRISTYL N-myristoylation site.  
 | PS50328 TYR\_RICH Tyrosine-rich region profile.  
 | PS50088 ANK\_REPEAT Ankyrin repeat profile.  
 | PS50297 ANK\_REP\_REGION Ankyrin repeat region circular profile.

>GL022 | [gene=GL022] [protein=similar to putative C ORF D]  
 | PS00001 ASN\_GLYCOSYLATION N-glycosylation site.  
 | PS00008 MYRISTYL N-myristoylation site.

>GL023 | [gene=GL023] [protein=unknown ]  
 | PS00001 ASN\_GLYCOSYLATION N-glycosylation site.  
 | PS00006 CK2\_PHOSPHO\_SITE Casein kinase II phosphorylation site.

>GL023.5 | [gene=GL023.5] [protein=unknown protein]  
 | PS00005 PKC\_PHOSPHO\_SITE Protein kinase C phosphorylation site.  
 | PS00006 CK2\_PHOSPHO\_SITE Casein kinase II phosphorylation site.  
 | PS00007 TYR\_PHOSPHO\_SITE Tyrosine kinase phosphorylation site.  
 | PS00008 MYRISTYL N-myristoylation site.

>GL024 | [gene=GL024] [protein=similar to putative C ORF B]  
 | PS00001 ASN\_GLYCOSYLATION N-glycosylation site.  
 | PS00004 CAMP\_PHOSPHO\_SITE cAMP- and cGMP-dependent protein kinase phosphorylation site.  
 | PS00005 PKC\_PHOSPHO\_SITE Protein kinase C phosphorylation site.

>GL025 | [gene=GL025] [protein=host-range protein]  
 | PS00001 ASN\_GLYCOSYLATION N-glycosylation site.  
 | PS00005 PKC\_PHOSPHO\_SITE Protein kinase C phosphorylation site.  
 | PS00006 CK2\_PHOSPHO\_SITE Casein kinase II phosphorylation site.  
 | PS00007 TYR\_PHOSPHO\_SITE Tyrosine kinase phosphorylation site.

>GL026 | [gene=GL026] [protein=unknown ]  
 | PS00001 ASN\_GLYCOSYLATION N-glycosylation site.  
 | PS00005 PKC\_PHOSPHO\_SITE Protein kinase C phosphorylation site.  
 | PS00006 CK2\_PHOSPHO\_SITE Casein kinase II phosphorylation site.  
 | PS00007 TYR\_PHOSPHO\_SITE Tyrosine kinase phosphorylation site.  
 | PS00008 MYRISTYL N-myristoylation site.

>GL027 | [gene=GL027] [protein=unknown ]  
 | PS00001 ASN\_GLYCOSYLATION N-glycosylation site.  
 | PS00005 PKC\_PHOSPHO\_SITE Protein kinase C phosphorylation site.  
 | PS00006 CK2\_PHOSPHO\_SITE Casein kinase II phosphorylation site.  
 | PS00008 MYRISTYL N-myristoylation site.

>GL028 | [gene=GL028] [protein=unknown ]  
 | PS00001 ASN\_GLYCOSYLATION N-glycosylation site.  
 | PS00005 PKC\_PHOSPHO\_SITE Protein kinase C phosphorylation site.  
 | PS00006 CK2\_PHOSPHO\_SITE Casein kinase II phosphorylation site.

| PS00007 TYR\_PHOSPHO\_SITE Tyrosine kinase phosphorylation site.

>GL029 | [gene=GL029] [protein=secreted complement binding]  
 | PS00001 ASN\_GLYCOSYLATION N-glycosylation site.  
 | PS00005 PKC\_PHOSPHO\_SITE Protein kinase C phosphorylation site.  
 | PS00006 CK2\_PHOSPHO\_SITE Casein kinase II phosphorylation site.  
 | PS00008 MYRISTYL N-myristoylation site.  
 | PS51257 PROKAR\_LIPOPROTEIN Prokaryotic membrane lipoprotein lipid attachment site profile.  
 | PS50923 SUSHI Sushi/CCP/SCR domain profile.

>GL030 | [gene=GL030] [protein=similar to putative C ORF A]  
 | PS00005 PKC\_PHOSPHO\_SITE Protein kinase C phosphorylation site.  
 | PS00342 MICROBODIES\_CTER Microbodies C-terminal targeting signal.

>GL031 | [gene=GL031] [protein=kelch-like protein]  
 | PS00001 ASN\_GLYCOSYLATION N-glycosylation site.  
 | PS00005 PKC\_PHOSPHO\_SITE Protein kinase C phosphorylation site.  
 | PS00006 CK2\_PHOSPHO\_SITE Casein kinase II phosphorylation site.  
 | PS00007 TYR\_PHOSPHO\_SITE Tyrosine kinase phosphorylation site.  
 | PS00008 MYRISTYL N-myristoylation site.  
 | PS50097 BTB BTB domain profile.

>GL032 | [gene=GL032] [protein=unknown ]  
 | PS00001 ASN\_GLYCOSYLATION N-glycosylation site.  
 | PS00005 PKC\_PHOSPHO\_SITE Protein kinase C phosphorylation site.  
 | PS00006 CK2\_PHOSPHO\_SITE Casein kinase II phosphorylation site.  
 | PS00007 TYR\_PHOSPHO\_SITE Tyrosine kinase phosphorylation site.

>GL033 | [gene=GL033] [protein=virokine ]  
 | PS00005 PKC\_PHOSPHO\_SITE Protein kinase C phosphorylation site.  
 | PS00006 CK2\_PHOSPHO\_SITE Casein kinase II phosphorylation site.  
 | PS00007 TYR\_PHOSPHO\_SITE Tyrosine kinase phosphorylation site.

>GL034 | [gene=GL034] [protein=alpha-amanitin sensitive protein]  
 | PS00001 ASN\_GLYCOSYLATION N-glycosylation site.  
 | PS00005 PKC\_PHOSPHO\_SITE Protein kinase C phosphorylation site.  
 | PS00006 CK2\_PHOSPHO\_SITE Casein kinase II phosphorylation site.  
 | PS00007 TYR\_PHOSPHO\_SITE Tyrosine kinase phosphorylation site.  
 | PS50079 NLS\_BP Bipartite nuclear localization signal profile.

>GL035 | [gene=GL035] [protein=ankyrin-like protein]  
 | PS00001 ASN\_GLYCOSYLATION N-glycosylation site.  
 | PS00005 PKC\_PHOSPHO\_SITE Protein kinase C phosphorylation site.  
 | PS00006 CK2\_PHOSPHO\_SITE Casein kinase II phosphorylation site.  
 | PS00008 MYRISTYL N-myristoylation site.  
 | PS50088 ANK\_REPEAT Ankyrin repeat profile.  
 | PS50297 ANK\_REP\_REGION Ankyrin repeat region circular profile.

>GL036 | [gene=GL036] [protein=unknown ]  
 | PS00001 ASN\_GLYCOSYLATION N-glycosylation site.  
 | PS00004 CAMP\_PHOSPHO\_SITE cAMP- and cGMP-dependent protein kinase phosphorylation site.  
 | PS00005 PKC\_PHOSPHO\_SITE Protein kinase C phosphorylation site.  
 | PS00006 CK2\_PHOSPHO\_SITE Casein kinase II phosphorylation site.  
 | PS00007 TYR\_PHOSPHO\_SITE Tyrosine kinase phosphorylation site.  
 | PS00008 MYRISTYL N-myristoylation site.

>GL037 | [gene=GL037] [protein=ankyrin-like protein]  
 | PS00001 ASN\_GLYCOSYLATION N-glycosylation site.  
 | PS00005 PKC\_PHOSPHO\_SITE Protein kinase C phosphorylation site.  
 | PS00006 CK2\_PHOSPHO\_SITE Casein kinase II phosphorylation site.  
 | PS00008 MYRISTYL N-myristoylation site.  
 | PS50088 ANK\_REPEAT Ankyrin repeat profile.

| PS50297 ANK\_REP\_REGION Ankyrin repeat region circular profile.

>GL038 | [gene=GL038] [protein=serine protease inhibitor-like]  
 | PS00001 ASN\_GLYCOSYLATION N-glycosylation site.  
 | PS00005 PKC\_PHOSPHO\_SITE Protein kinase C phosphorylation site.  
 | PS00006 CK2\_PHOSPHO\_SITE Casein kinase II phosphorylation site.  
 | PS00008 MYRISTYL N-myristoylation site.

>GL039 | [gene=GL039] [protein=similar to putative K ORF A]  
 | PS00001 ASN\_GLYCOSYLATION N-glycosylation site.  
 | PS00005 PKC\_PHOSPHO\_SITE Protein kinase C phosphorylation site.  
 | PS00006 CK2\_PHOSPHO\_SITE Casein kinase II phosphorylation site.

>GL040 | [gene=GL040] [protein=similar to putative K ORF B]  
 | PS00006 CK2\_PHOSPHO\_SITE Casein kinase II phosphorylation site.

>GL041 | [gene=GL041] [protein=hypothetical protein, orthologous to m0036R]  
 | PS00001 ASN\_GLYCOSYLATION N-glycosylation site.  
 | PS00005 PKC\_PHOSPHO\_SITE Protein kinase C phosphorylation site.

>GL042 | [gene=GL042] [protein=interferon resistance protein]  
 | PS00005 PKC\_PHOSPHO\_SITE Protein kinase C phosphorylation site.  
 | PS00007 TYR\_PHOSPHO\_SITE Tyrosine kinase phosphorylation site.

>GL043 | [gene=GL043] [EC\_number=3.1.1.3] [protein=phospholipase-D-like protein]  
 | PS00001 ASN\_GLYCOSYLATION N-glycosylation site.  
 | PS00005 PKC\_PHOSPHO\_SITE Protein kinase C phosphorylation site.  
 | PS00006 CK2\_PHOSPHO\_SITE Casein kinase II phosphorylation site.  
 | PS00008 MYRISTYL N-myristoylation site.  
 | PS50035 PLD Phospholipase D phosphodiesterase active site profile.

>GL044 | [gene=GL044] [protein=putative monoglyceride lipase]

>GL045 | [gene=GL045] [protein=putative monoglyceride lipase]  
 | PS00005 PKC\_PHOSPHO\_SITE Protein kinase C phosphorylation site.  
 | PS00007 TYR\_PHOSPHO\_SITE Tyrosine kinase phosphorylation site.

>GL046 | [gene=GL046] [protein=putative monoglyceride lipase]  
 | PS00001 ASN\_GLYCOSYLATION N-glycosylation site.  
 | PS00005 PKC\_PHOSPHO\_SITE Protein kinase C phosphorylation site.  
 | PS00006 CK2\_PHOSPHO\_SITE Casein kinase II phosphorylation site.  
 | PS00008 MYRISTYL N-myristoylation site.

>GL047 | [gene=GL047] [protein=unknown ]  
 | PS00001 ASN\_GLYCOSYLATION N-glycosylation site.  
 | PS00004 CAMP\_PHOSPHO\_SITE cAMP- and cGMP-dependent protein kinase phosphorylation site.  
 | PS00005 PKC\_PHOSPHO\_SITE Protein kinase C phosphorylation site.  
 | PS00006 CK2\_PHOSPHO\_SITE Casein kinase II phosphorylation site.  
 | PS00007 TYR\_PHOSPHO\_SITE Tyrosine kinase phosphorylation site.

>GL048 | [gene=GL048] [protein=hypothetical protein, orthologous to m0043L]  
 | PS00005 PKC\_PHOSPHO\_SITE Protein kinase C phosphorylation site.

>GL049 | [gene=GL049] [protein=protein localizes exclusively to the mitochondria where it functions to inhibit apoptosis]  
 | PS00001 ASN\_GLYCOSYLATION N-glycosylation site.  
 | PS00005 PKC\_PHOSPHO\_SITE Protein kinase C phosphorylation site.  
 | PS00006 CK2\_PHOSPHO\_SITE Casein kinase II phosphorylation site.  
 | PS00007 TYR\_PHOSPHO\_SITE Tyrosine kinase phosphorylation site.  
 | PS00008 MYRISTYL N-myristoylation site.  
 | PS00009 AMIDATION Amidation site.

>GL050 | [gene=GL050] [EC\_number=3.6.1.23] [protein=dUTPase ]  
 | PS00005 PKC\_PHOSPHO\_SITE Protein kinase C phosphorylation site.  
 | PS00006 CK2\_PHOSPHO\_SITE Casein kinase II phosphorylation site.  
 | PS00008 MYRISTYL N-myristoylation site.  
 | PS00016 RGD Cell attachment sequence.

>GL051 | [gene=GL051] [protein=kelch-like protein]  
 | PS00001 ASN\_GLYCOSYLATION N-glycosylation site.  
 | PS00004 CAMP\_PHOSPHO\_SITE cAMP- and cGMP-dependent protein kinase phosphorylation site.  
 | PS00005 PKC\_PHOSPHO\_SITE Protein kinase C phosphorylation site.  
 | PS00006 CK2\_PHOSPHO\_SITE Casein kinase II phosphorylation site.  
 | PS00008 MYRISTYL N-myristoylation site.  
 | PS00009 AMIDATION Amidation site.  
 | PS50097 BTB BTB domain profile.

>GL052 | [gene=GL052] [protein=similar to putative F ORF A]  
 | PS00008 MYRISTYL N-myristoylation site.

>GL053 | [gene=GL053] [EC\_number=1.17.4.1] [protein=ribonucleotide reductase small subunit]  
 | PS00001 ASN\_GLYCOSYLATION N-glycosylation site.  
 | PS00005 PKC\_PHOSPHO\_SITE Protein kinase C phosphorylation site.  
 | PS00006 CK2\_PHOSPHO\_SITE Casein kinase II phosphorylation site.  
 | PS00007 TYR\_PHOSPHO\_SITE Tyrosine kinase phosphorylation site.  
 | PS00008 MYRISTYL N-myristoylation site.  
 | PS00368 RIBORED\_SMALL Ribonucleotide reductase small subunit signature.

>GL054 | [gene=GL054] [protein=similar to putative F ORF B]  
 | PS00006 CK2\_PHOSPHO\_SITE Casein kinase II phosphorylation site.  
 | PS00008 MYRISTYL N-myristoylation site.

>GL055 | [gene=GL055] [protein=similar to putative F ORF C]  
 | PS00001 ASN\_GLYCOSYLATION N-glycosylation site.  
 | PS00005 PKC\_PHOSPHO\_SITE Protein kinase C phosphorylation site.

>GL056 | [gene=GL056] [protein=major membrane protein]  
 | PS00001 ASN\_GLYCOSYLATION N-glycosylation site.  
 | PS00005 PKC\_PHOSPHO\_SITE Protein kinase C phosphorylation site.  
 | PS00006 CK2\_PHOSPHO\_SITE Casein kinase II phosphorylation site.  
 | PS00007 TYR\_PHOSPHO\_SITE Tyrosine kinase phosphorylation site.  
 | PS00008 MYRISTYL N-myristoylation site.  
 | PS51257 PROKAR\_LIPOPROTEIN Prokaryotic membrane lipoprotein lipid attachment site profile.

>GL057 | [gene=GL057] [protein=unknown ]  
 | PS00001 ASN\_GLYCOSYLATION N-glycosylation site.

>GL058 | [gene=GL058] [protein=unknown ]  
 | PS00007 TYR\_PHOSPHO\_SITE Tyrosine kinase phosphorylation site.  
 | PS00008 MYRISTYL N-myristoylation site.

>GL059 | [gene=GL059] [protein=protein with iActA-like proline repeats]  
 | PS00004 CAMP\_PHOSPHO\_SITE cAMP- and cGMP-dependent protein kinase phosphorylation site.  
 | PS00005 PKC\_PHOSPHO\_SITE Protein kinase C phosphorylation site.  
 | PS00006 CK2\_PHOSPHO\_SITE Casein kinase II phosphorylation site.

>GL060 | [gene=GL060] [protein=S-S bond formation pathway protein]  
 | PS00001 ASN\_GLYCOSYLATION N-glycosylation site.  
 | PS00005 PKC\_PHOSPHO\_SITE Protein kinase C phosphorylation site.  
 | PS00006 CK2\_PHOSPHO\_SITE Casein kinase II phosphorylation site.  
 | PS00008 MYRISTYL N-myristoylation site.

>GL061 | [gene=GL061] [EC\_number=2.7.11.1] [protein=ser/thr kinase]  
 | PS00001 ASN\_GLYCOSYLATION N-glycosylation site.  
 | PS00004 CAMP\_PHOSPHO\_SITE cAMP- and cGMP-dependent protein kinase phosphorylation site.  
 | PS00005 PKC\_PHOSPHO\_SITE Protein kinase C phosphorylation site.  
 | PS00006 CK2\_PHOSPHO\_SITE Casein kinase II phosphorylation site.  
 | PS00007 TYR\_PHOSPHO\_SITE Tyrosine kinase phosphorylation site.  
 | PS00008 MYRISTYL N-myristoylation site.



| PS00108 PROTEIN\_KINASE\_ST Serine/Threonine protein kinases active-site signature.  
 | PS50011 PROTEIN\_KINASE\_DOM Protein kinase domain profile.  
 >GL062 | [gene=GL062] [protein=similar to putative F ORF D]  
 | PS00004 CAMP\_PHOSPHO\_SITE cAMP- and cGMP-dependent protein kinase phosphorylation site.  
 | PS00005 PKC\_PHOSPHO\_SITE Protein kinase C phosphorylation site.  
 | PS00006 CK2\_PHOSPHO\_SITE Casein kinase II phosphorylation site.  
 >GL063 | [gene=GL063] [protein=unknown ]  
 | PS00001 ASN\_GLYCOSYLATION N-glycosylation site.  
 | PS00004 CAMP\_PHOSPHO\_SITE cAMP- and cGMP-dependent protein kinase phosphorylation site.  
 | PS00005 PKC\_PHOSPHO\_SITE Protein kinase C phosphorylation site.  
 | PS00006 CK2\_PHOSPHO\_SITE Casein kinase II phosphorylation site.  
 | PS00007 TYR\_PHOSPHO\_SITE Tyrosine kinase phosphorylation site.  
 | PS00008 MYRISTYL N-myristoylation site.  
 >GL064 | [gene=GL064] [protein=involved in plaque and EEV formation]  
 | PS00001 ASN\_GLYCOSYLATION N-glycosylation site.  
 | PS00004 CAMP\_PHOSPHO\_SITE cAMP- and cGMP-dependent protein kinase phosphorylation site.  
 | PS00005 PKC\_PHOSPHO\_SITE Protein kinase C phosphorylation site.  
 | PS00006 CK2\_PHOSPHO\_SITE Casein kinase II phosphorylation site.  
 | PS00008 MYRISTYL N-myristoylation site.  
 >GL065 | [gene=GL065] [protein=similar to putative F ORF E]  
 | PS00001 ASN\_GLYCOSYLATION N-glycosylation site.  
 | PS00005 PKC\_PHOSPHO\_SITE Protein kinase C phosphorylation site.  
 | PS00006 CK2\_PHOSPHO\_SITE Casein kinase II phosphorylation site.  
 | PS00008 MYRISTYL N-myristoylation site.  
 >GL066 | [gene=GL066] [protein=palmytilated EEV membrane protein]  
 | PS00001 ASN\_GLYCOSYLATION N-glycosylation site.  
 | PS00005 PKC\_PHOSPHO\_SITE Protein kinase C phosphorylation site.  
 | PS00006 CK2\_PHOSPHO\_SITE Casein kinase II phosphorylation site.  
 | PS00008 MYRISTYL N-myristoylation site.  
 | PS00009 AMIDATION Amidation site.  
 | PS50035 PLD Phospholipase D phosphodiesterase active site profile.  
 >GL067 | [gene=GL067] [protein=unknown ]  
 | PS00001 ASN\_GLYCOSYLATION N-glycosylation site.  
 | PS00006 CK2\_PHOSPHO\_SITE Casein kinase II phosphorylation site.  
 | PS00008 MYRISTYL N-myristoylation site.  
 >GL068.5 | [gene=GL068.5] [protein=Renilla luciferase-Aequorea green fluorescent protein (GFP) fusion protein.]  
 | PS00001 ASN\_GLYCOSYLATION N-glycosylation site.  
 | PS00004 CAMP\_PHOSPHO\_SITE cAMP- and cGMP-dependent protein kinase phosphorylation site.  
 | PS00005 PKC\_PHOSPHO\_SITE Protein kinase C phosphorylation site.  
 | PS00006 CK2\_PHOSPHO\_SITE Casein kinase II phosphorylation site.  
 | PS00007 TYR\_PHOSPHO\_SITE Tyrosine kinase phosphorylation site.  
 | PS00008 MYRISTYL N-myristoylation site.  
 | PS00017 ATP\_GTP\_A ATP/GTP-binding site motif A (P-loop).  
 >GL069 | [gene=GL069] [protein=unknown]  
 | PS00001 ASN\_GLYCOSYLATION N-glycosylation site.  
 | PS00005 PKC\_PHOSPHO\_SITE Protein kinase C phosphorylation site.  
 | PS00006 CK2\_PHOSPHO\_SITE Casein kinase II phosphorylation site.  
 | PS00007 TYR\_PHOSPHO\_SITE Tyrosine kinase phosphorylation site.  
 | PS00016 RGD Cell attachment sequence.  
 >GL070 | [gene=GL070] [protein=unknown ]

| PS00001 ASN\_GLYCOSYLATION N-glycosylation site.  
 | PS00005 PKC\_PHOSPHO\_SITE Protein kinase C phosphorylation site.  
 | PS00006 CK2\_PHOSPHO\_SITE Casein kinase II phosphorylation site.  
 | PS00008 MYRISTYL N-myristoylation site.  
 >GL071 | [gene=GL071] [protein=putative DNA-binding phosphoprotein]  
 | PS00004 CAMP\_PHOSPHO\_SITE cAMP- and cGMP-dependent protein kinase phosphorylation site.  
 | PS00006 CK2\_PHOSPHO\_SITE Casein kinase II phosphorylation site.  
 | PS00008 MYRISTYL N-myristoylation site.  
 >GL072 | [gene=GL072] [protein=similar to putative E ORF A]  
 | PS00001 ASN\_GLYCOSYLATION N-glycosylation site.  
 | PS00006 CK2\_PHOSPHO\_SITE Casein kinase II phosphorylation site.  
 >GL073 | [gene=GL073] [EC\_number=2.7.7.19] [protein=poly-A polymerase catalytic subunit VP55]  
 | PS00001 ASN\_GLYCOSYLATION N-glycosylation site.  
 | PS00005 PKC\_PHOSPHO\_SITE Protein kinase C phosphorylation site.  
 | PS00006 CK2\_PHOSPHO\_SITE Casein kinase II phosphorylation site.  
 | PS00007 TYR\_PHOSPHO\_SITE Tyrosine kinase phosphorylation site.  
 | PS00009 AMIDATION Amidation site.  
 >GL074 | [gene=GL074] [protein=unknown ]  
 | PS00001 ASN\_GLYCOSYLATION N-glycosylation site.  
 | PS00005 PKC\_PHOSPHO\_SITE Protein kinase C phosphorylation site.  
 | PS00006 CK2\_PHOSPHO\_SITE Casein kinase II phosphorylation site.  
 | PS00007 TYR\_PHOSPHO\_SITE Tyrosine kinase phosphorylation site.  
 | PS00008 MYRISTYL N-myristoylation site.  
 >GL075 | [gene=GL075] [protein=double-stranded RNA binding protein]  
 | PS00005 PKC\_PHOSPHO\_SITE Protein kinase C phosphorylation site.  
 | PS00006 CK2\_PHOSPHO\_SITE Casein kinase II phosphorylation site.  
 | PS00008 MYRISTYL N-myristoylation site.  
 | PS50137 DS\_RBD Double stranded RNA-binding domain (dsRBD) profile.  
 | PS50139 DRADA\_REPEAT DRADA repeat profile.  
 >GL076 | [gene=GL076] [EC\_number=2.7.7.6] [protein=DNA-dependent RNA polymerase subunit rpo30]  
 | PS00001 ASN\_GLYCOSYLATION N-glycosylation site.  
 | PS00005 PKC\_PHOSPHO\_SITE Protein kinase C phosphorylation site.  
 | PS00006 CK2\_PHOSPHO\_SITE Casein kinase II phosphorylation site.  
 | PS00007 TYR\_PHOSPHO\_SITE Tyrosine kinase phosphorylation site.  
 | PS00008 MYRISTYL N-myristoylation site.  
 | PS00466 ZF\_TFIIS\_1 Zinc finger TFIIS-type signature.  
 | PS51133 ZF\_TFIIS\_2 Zinc finger TFIIS-type profile.  
 >GL077 | [gene=GL077] [protein=abundant component of virosome]  
 | PS00001 ASN\_GLYCOSYLATION N-glycosylation site.  
 | PS00005 PKC\_PHOSPHO\_SITE Protein kinase C phosphorylation site.  
 | PS00006 CK2\_PHOSPHO\_SITE Casein kinase II phosphorylation site.  
 | PS00007 TYR\_PHOSPHO\_SITE Tyrosine kinase phosphorylation site.  
 >GL078 | [gene=GL078] [protein=similar to putative E ORF B]  
 | PS00001 ASN\_GLYCOSYLATION N-glycosylation site.  
 | PS00004 CAMP\_PHOSPHO\_SITE cAMP- and cGMP-dependent protein kinase phosphorylation site.  
 | PS00006 CK2\_PHOSPHO\_SITE Casein kinase II phosphorylation site.  
 >GL079 | [gene=GL079] [protein=unknown ]  
 | PS00001 ASN\_GLYCOSYLATION N-glycosylation site.  
 | PS00004 CAMP\_PHOSPHO\_SITE cAMP- and cGMP-dependent protein kinase phosphorylation site.  
 | PS00005 PKC\_PHOSPHO\_SITE Protein kinase C phosphorylation site.

| PS00006 CK2\_PHOSPHO\_SITE Casein kinase II phosphorylation site.  
| PS00007 TYR\_PHOSPHO\_SITE Tyrosine kinase phosphorylation site.  
| PS00008 MYRISTYL N-myristoylation site.  
>GL080 | [gene=GL080] [protein=soluble, myristylprotein]  
| PS00001 ASN\_GLYCOSYLATION N-glycosylation site.  
| PS00006 CK2\_PHOSPHO\_SITE Casein kinase II phosphorylation site.  
| PS00008 MYRISTYL N-myristoylation site.  
>GL081 | [gene=GL081] [protein=similar to putative E ORF C]  
| PS00001 ASN\_GLYCOSYLATION N-glycosylation site.  
| PS00006 CK2\_PHOSPHO\_SITE Casein kinase II phosphorylation site.  
| PS00008 MYRISTYL N-myristoylation site.  
>GL082 | [gene=GL082] [protein=membrane protein]  
| PS00001 ASN\_GLYCOSYLATION N-glycosylation site.  
| PS00004 CAMP\_PHOSPHO\_SITE cAMP- and cGMP-dependent protein kinase phosphorylation site.  
| PS00005 PKC\_PHOSPHO\_SITE Protein kinase C phosphorylation site.  
| PS00006 CK2\_PHOSPHO\_SITE Casein kinase II phosphorylation site.  
| PS00008 MYRISTYL N-myristoylation site.  
>GL083 | [gene=GL083] [protein=similar to putative E ORF D]  
| PS00005 PKC\_PHOSPHO\_SITE Protein kinase C phosphorylation site.  
>GL084 | [gene=GL084] [EC\_number=2.7.7.7] [protein=DNA polymerase]  
| PS00001 ASN\_GLYCOSYLATION N-glycosylation site.  
| PS00004 CAMP\_PHOSPHO\_SITE cAMP- and cGMP-dependent protein kinase phosphorylation site.  
| PS00005 PKC\_PHOSPHO\_SITE Protein kinase C phosphorylation site.  
| PS00006 CK2\_PHOSPHO\_SITE Casein kinase II phosphorylation site.  
| PS00007 TYR\_PHOSPHO\_SITE Tyrosine kinase phosphorylation site.  
| PS00008 MYRISTYL N-myristoylation site.  
| PS00009 AMIDATION Amidation site.  
| PS00116 DNA\_POLYMERASE\_B DNA polymerase family B signature.  
>GL085 | [gene=GL085] [protein=similar to putative E ORF E]  
| PS00006 CK2\_PHOSPHO\_SITE Casein kinase II phosphorylation site.  
| PS00008 MYRISTYL N-myristoylation site.  
>GL086 | [gene=GL086] [protein=sulfhydryl oxidase]  
| PS00006 CK2\_PHOSPHO\_SITE Casein kinase II phosphorylation site.  
| PS00008 MYRISTYL N-myristoylation site.  
| PS51324 ERV\_ALR ERV/ALR sulfhydryl oxidase domain profile.  
>GL087 | [gene=GL087] [protein=virion core protein]  
| PS00001 ASN\_GLYCOSYLATION N-glycosylation site.  
| PS00006 CK2\_PHOSPHO\_SITE Casein kinase II phosphorylation site.  
| PS00007 TYR\_PHOSPHO\_SITE Tyrosine kinase phosphorylation site.  
>GL088 | [gene=GL088] [protein=unknown ]  
| PS00001 ASN\_GLYCOSYLATION N-glycosylation site.  
| PS00004 CAMP\_PHOSPHO\_SITE cAMP- and cGMP-dependent protein kinase phosphorylation site.  
| PS00005 PKC\_PHOSPHO\_SITE Protein kinase C phosphorylation site.  
| PS00006 CK2\_PHOSPHO\_SITE Casein kinase II phosphorylation site.  
| PS00007 TYR\_PHOSPHO\_SITE Tyrosine kinase phosphorylation site.  
| PS00008 MYRISTYL N-myristoylation site.  
| PS50079 NLS\_BP Bipartite nuclear localization signal profile.  
| PS00029 LEUCINE\_ZIPPER Leucine zipper pattern.  
>GL089 | [gene=GL089] [protein=similar to putative E ORF F]  
| PS00005 PKC\_PHOSPHO\_SITE Protein kinase C phosphorylation site.  
| PS00006 CK2\_PHOSPHO\_SITE Casein kinase II phosphorylation site.  
>GL090 | [gene=GL090] [protein=unknown protein, orthologous to CPXV078A]

| PS00001 ASN\_GLYCOSYLATION N-glycosylation site.  
| PS00005 PKC\_PHOSPHO\_SITE Protein kinase C phosphorylation site.  
| PS00006 CK2\_PHOSPHO\_SITE Casein kinase II phosphorylation site.  
>GL091 | [gene=GL091] [EC\_number=1.8.4.-] [protein=nonessential glutaredoxin]  
| PS00005 PKC\_PHOSPHO\_SITE Protein kinase C phosphorylation site.  
| PS00007 TYR\_PHOSPHO\_SITE Tyrosine kinase phosphorylation site.  
| PS00008 MYRISTYL N-myristoylation site.  
| PS00195 GLUTAREDOXIN\_1 Glutaredoxin active site.  
| PS51354 GLUTAREDOXIN\_2 Glutaredoxin domain profile.  
>GL091.5 | [gene=GL091.5] [protein=Extremely short, with well conserved putative early and late promoter]  
| PS00001 ASN\_GLYCOSYLATION N-glycosylation site.  
| PS00005 PKC\_PHOSPHO\_SITE Protein kinase C phosphorylation site.  
| PS00006 CK2\_PHOSPHO\_SITE Casein kinase II phosphorylation site.  
>GL092 | [gene=GL092] [protein=DNA-binding core protein]  
| PS00001 ASN\_GLYCOSYLATION N-glycosylation site.  
| PS00004 CAMP\_PHOSPHO\_SITE cAMP- and cGMP-dependent protein kinase phosphorylation site.  
| PS00005 PKC\_PHOSPHO\_SITE Protein kinase C phosphorylation site.  
| PS00006 CK2\_PHOSPHO\_SITE Casein kinase II phosphorylation site.  
| PS00007 TYR\_PHOSPHO\_SITE Tyrosine kinase phosphorylation site.  
| PS00008 MYRISTYL N-myristoylation site.  
| PS00009 AMIDATION Amidation site.  
>GL093 | [gene=GL093] [protein=hypothetical protein, orthologous to m0086L]  
| PS00001 ASN\_GLYCOSYLATION N-glycosylation site.  
| PS00006 CK2\_PHOSPHO\_SITE Casein kinase II phosphorylation site.  
| PS00008 MYRISTYL N-myristoylation site.  
>GL094 | [gene=GL094] [protein=ssDNA-binding phosphoprotein]  
| PS00001 ASN\_GLYCOSYLATION N-glycosylation site.  
| PS00005 PKC\_PHOSPHO\_SITE Protein kinase C phosphorylation site.  
| PS00006 CK2\_PHOSPHO\_SITE Casein kinase II phosphorylation site.  
>GL095 | [gene=GL095] [EC\_number=1.17.4.1] [protein=ribonucleotide reductase large subunit]  
| PS00001 ASN\_GLYCOSYLATION N-glycosylation site.  
| PS00004 CAMP\_PHOSPHO\_SITE cAMP- and cGMP-dependent protein kinase phosphorylation site.  
| PS00005 PKC\_PHOSPHO\_SITE Protein kinase C phosphorylation site.  
| PS00006 CK2\_PHOSPHO\_SITE Casein kinase II phosphorylation site.  
| PS00007 TYR\_PHOSPHO\_SITE Tyrosine kinase phosphorylation site.  
| PS00008 MYRISTYL N-myristoylation site.  
| PS51161 ATP\_CONE ATP-cone domain profile.  
| PS00089 RIBORED\_LARGE Ribonucleotide reductase large subunit signature.  
>GL096 | [gene=GL096] [protein=similar to putative I ORF A]  
| PS00005 PKC\_PHOSPHO\_SITE Protein kinase C phosphorylation site.  
| PS00006 CK2\_PHOSPHO\_SITE Casein kinase II phosphorylation site.  
>GL097 | [gene=GL097] [protein=putative protein, orthologous to CMP70.56R]  
| PS00001 ASN\_GLYCOSYLATION N-glycosylation site.  
| PS00008 MYRISTYL N-myristoylation site.  
>GL098 | [gene=GL098] [protein=IMV protein VP13]  
| PS00005 PKC\_PHOSPHO\_SITE Protein kinase C phosphorylation site.  
>GL099 | [gene=GL099] [protein=protein binds to viral telomers and directs genome encapsidation]  
| PS00001 ASN\_GLYCOSYLATION N-glycosylation site.  
| PS00004 CAMP\_PHOSPHO\_SITE cAMP- and cGMP-dependent protein kinase phosphorylation site.  
| PS00005 PKC\_PHOSPHO\_SITE Protein kinase C phosphorylation site.

| PS00006 CK2\_PHOSPHO\_SITE Casein kinase II phosphorylation site.  
>GL100 | [gene=GL100] [protein=viral core cysteine proteinase]  
| PS00001 ASN\_GLYCOSYLATION N-glycosylation site.  
| PS00004 CAMP\_PHOSPHO\_SITE cAMP- and cGMP-dependent protein kinase phosphorylation site.  
| PS00005 PKC\_PHOSPHO\_SITE Protein kinase C phosphorylation site.  
| PS00006 CK2\_PHOSPHO\_SITE Casein kinase II phosphorylation site.  
| PS00008 MYRISTYL N-myristoylation site.  
>GL101 | [gene=GL101] [protein=RNA-helicase, DExH-NPH-II]  
| PS00001 ASN\_GLYCOSYLATION N-glycosylation site.  
| PS00004 CAMP\_PHOSPHO\_SITE cAMP- and cGMP-dependent protein kinase phosphorylation site.  
| PS00005 PKC\_PHOSPHO\_SITE Protein kinase C phosphorylation site.  
| PS00006 CK2\_PHOSPHO\_SITE Casein kinase II phosphorylation site.  
| PS00007 TYR\_PHOSPHO\_SITE Tyrosine kinase phosphorylation site.  
| PS00008 MYRISTYL N-myristoylation site.  
| PS00009 AMIDATION Amidation site.  
| PS00017 ATP\_GTP\_A ATP/GTP-binding site motif A (P-loop).  
| PS51192 HELICASE\_ATP\_BIND\_1 Superfamilies 1 and 2 helicase ATP-binding type-1 domain profile.  
| PS51194 HELICASE\_CTER Superfamilies 1 and 2 helicase C-terminal domain profile.  
| PS00690 DEAH\_ATP\_HELICASE DEAH-box subfamily ATP-dependent helicases signature.  
>GL102 | [gene=GL102] [protein=insulin metalloproteinase-like protein]  
| PS00001 ASN\_GLYCOSYLATION N-glycosylation site.  
| PS00004 CAMP\_PHOSPHO\_SITE cAMP- and cGMP-dependent protein kinase phosphorylation site.  
| PS00005 PKC\_PHOSPHO\_SITE Protein kinase C phosphorylation site.  
| PS00006 CK2\_PHOSPHO\_SITE Casein kinase II phosphorylation site.  
| PS00007 TYR\_PHOSPHO\_SITE Tyrosine kinase phosphorylation site.  
| PS00008 MYRISTYL N-myristoylation site.  
>GL103 | [gene=GL103] [protein=unknown ]  
| PS00004 CAMP\_PHOSPHO\_SITE cAMP- and cGMP-dependent protein kinase phosphorylation site.  
| PS00005 PKC\_PHOSPHO\_SITE Protein kinase C phosphorylation site.  
| PS00006 CK2\_PHOSPHO\_SITE Casein kinase II phosphorylation site.  
| PS00009 AMIDATION Amidation site.  
>GL104 | [gene=GL104] [protein=late transcription elongation factor]  
| PS00001 ASN\_GLYCOSYLATION N-glycosylation site.  
| PS00005 PKC\_PHOSPHO\_SITE Protein kinase C phosphorylation site.  
| PS00006 CK2\_PHOSPHO\_SITE Casein kinase II phosphorylation site.  
| PS00007 TYR\_PHOSPHO\_SITE Tyrosine kinase phosphorylation site.  
>GL105 | [gene=GL105] [EC\_number=1.8.4.-] [protein=thioredoxin-like protein]  
| PS00001 ASN\_GLYCOSYLATION N-glycosylation site.  
| PS00004 CAMP\_PHOSPHO\_SITE cAMP- and cGMP-dependent protein kinase phosphorylation site.  
| PS00005 PKC\_PHOSPHO\_SITE Protein kinase C phosphorylation site.  
| PS00006 CK2\_PHOSPHO\_SITE Casein kinase II phosphorylation site.  
| PS00007 TYR\_PHOSPHO\_SITE Tyrosine kinase phosphorylation site.  
| PS00008 MYRISTYL N-myristoylation site.  
>GL106 | [gene=GL106] [protein=viral membrane formation protein]  
| PS00001 ASN\_GLYCOSYLATION N-glycosylation site.  
| PS00004 CAMP\_PHOSPHO\_SITE cAMP- and cGMP-dependent protein kinase phosphorylation site.  
| PS00005 PKC\_PHOSPHO\_SITE Protein kinase C phosphorylation site.  
| PS00006 CK2\_PHOSPHO\_SITE Casein kinase II phosphorylation site.

| PS00008 MYRISTYL N-myristoylation site.  
>GL107 | [gene=GL107] [EC\_number=2.7.7.6] [protein=DNA-dependent RNA polymerase subunit rpo7]  
| PS00001 ASN\_GLYCOSYLATION N-glycosylation site.  
| PS00004 CAMP\_PHOSPHO\_SITE cAMP- and cGMP-dependent protein kinase phosphorylation site.  
| PS00005 PKC\_PHOSPHO\_SITE Protein kinase C phosphorylation site.  
| PS00006 CK2\_PHOSPHO\_SITE Casein kinase II phosphorylation site.  
>GL108 | [gene=GL108] [protein=unknown ]  
| PS00001 ASN\_GLYCOSYLATION N-glycosylation site.  
| PS00005 PKC\_PHOSPHO\_SITE Protein kinase C phosphorylation site.  
| PS00006 CK2\_PHOSPHO\_SITE Casein kinase II phosphorylation site.  
| PS00008 MYRISTYL N-myristoylation site.  
>GL109 | [gene=GL109] [protein=virion structural protein]  
| PS00001 ASN\_GLYCOSYLATION N-glycosylation site.  
| PS00004 CAMP\_PHOSPHO\_SITE cAMP- and cGMP-dependent protein kinase phosphorylation site.  
| PS00005 PKC\_PHOSPHO\_SITE Protein kinase C phosphorylation site.  
| PS00006 CK2\_PHOSPHO\_SITE Casein kinase II phosphorylation site.  
| PS00008 MYRISTYL N-myristoylation site.  
>GL110 | [gene=GL110] [protein=similar to putative G ORF A]  
| PS00005 PKC\_PHOSPHO\_SITE Protein kinase C phosphorylation site.  
| PS00006 CK2\_PHOSPHO\_SITE Casein kinase II phosphorylation site.  
| PS00008 MYRISTYL N-myristoylation site.  
>GL111 | [gene=GL111] [protein=similar to putative G ORF B]  
| PS00001 ASN\_GLYCOSYLATION N-glycosylation site.  
| PS00005 PKC\_PHOSPHO\_SITE Protein kinase C phosphorylation site.  
| PS00006 CK2\_PHOSPHO\_SITE Casein kinase II phosphorylation site.  
>GL112 | [gene=GL112] [protein=late gene transcription VLTF-1]  
| PS00005 PKC\_PHOSPHO\_SITE Protein kinase C phosphorylation site.  
| PS00006 CK2\_PHOSPHO\_SITE Casein kinase II phosphorylation site.  
| PS00008 MYRISTYL N-myristoylation site.  
>GL113 | [gene=GL113] [protein=myristylprotein ]  
| PS00001 ASN\_GLYCOSYLATION N-glycosylation site.  
| PS00005 PKC\_PHOSPHO\_SITE Protein kinase C phosphorylation site.  
| PS00006 CK2\_PHOSPHO\_SITE Casein kinase II phosphorylation site.  
| PS00007 TYR\_PHOSPHO\_SITE Tyrosine kinase phosphorylation site.  
| PS00008 MYRISTYL N-myristoylation site.  
>GL114 | [gene=GL114] [protein=IMV membrane protein]  
| PS00001 ASN\_GLYCOSYLATION N-glycosylation site.  
| PS00005 PKC\_PHOSPHO\_SITE Protein kinase C phosphorylation site.  
| PS00006 CK2\_PHOSPHO\_SITE Casein kinase II phosphorylation site.  
| PS00008 MYRISTYL N-myristoylation site.  
>GL115 | [gene=GL115] [protein=unknown ]  
| PS00005 PKC\_PHOSPHO\_SITE Protein kinase C phosphorylation site.  
>GL116 | [gene=GL116] [protein=unknown ]  
| PS00001 ASN\_GLYCOSYLATION N-glycosylation site.  
| PS00004 CAMP\_PHOSPHO\_SITE cAMP- and cGMP-dependent protein kinase phosphorylation site.  
| PS00005 PKC\_PHOSPHO\_SITE Protein kinase C phosphorylation site.  
| PS00006 CK2\_PHOSPHO\_SITE Casein kinase II phosphorylation site.  
| PS00007 TYR\_PHOSPHO\_SITE Tyrosine kinase phosphorylation site.  
| PS00008 MYRISTYL N-myristoylation site.  
| PS00016 RGD Cell attachment sequence.  
>GL117 | [gene=GL117] [protein=core protein vp8]

| PS00001 ASN\_GLYCOSYLATION N-glycosylation site.  
 | PS00005 PKC\_PHOSPHO\_SITE Protein kinase C phosphorylation site.  
 | PS00006 CK2\_PHOSPHO\_SITE Casein kinase II phosphorylation site.  
 | PS00008 MYRISTYL N-myristoylation site.  
 | PS00009 AMIDATION Amidation site.  
 >GL118 | [gene=GL118] [protein=putative membrane protein, component of poxvirus multiprotein entry-fusion complex]  
 | PS00001 ASN\_GLYCOSYLATION N-glycosylation site.  
 | PS00005 PKC\_PHOSPHO\_SITE Protein kinase C phosphorylation site.  
 | PS00006 CK2\_PHOSPHO\_SITE Casein kinase II phosphorylation site.  
 >GL119 | [gene=GL119] [protein=virion protein]  
 | PS00004 CAMP\_PHOSPHO\_SITE cAMP- and cGMP-dependent protein kinase phosphorylation site.  
 | PS00005 PKC\_PHOSPHO\_SITE Protein kinase C phosphorylation site.  
 | PS00006 CK2\_PHOSPHO\_SITE Casein kinase II phosphorylation site.  
 >GL120 | [gene=GL120] [EC\_number=2.7.1.21] [protein=thymidine kinase]  
 | PS00005 PKC\_PHOSPHO\_SITE Protein kinase C phosphorylation site.  
 | PS00006 CK2\_PHOSPHO\_SITE Casein kinase II phosphorylation site.  
 | PS00007 TYR\_PHOSPHO\_SITE Tyrosine kinase phosphorylation site.  
 | PS00008 MYRISTYL N-myristoylation site.  
 | PS00017 ATP\_GTP\_A ATP/GTP-binding site motif A (P-loop).  
 >GL120.5 | [gene=GL120.5] [EC\_number=3.2.1.23] [protein=beta-D-galactosidase]  
 | PS00001 ASN\_GLYCOSYLATION N-glycosylation site.  
 | PS00005 PKC\_PHOSPHO\_SITE Protein kinase C phosphorylation site.  
 | PS00006 CK2\_PHOSPHO\_SITE Casein kinase II phosphorylation site.  
 | PS00007 TYR\_PHOSPHO\_SITE Tyrosine kinase phosphorylation site.  
 | PS00008 MYRISTYL N-myristoylation site.  
 | PS00016 RGD Cell attachment sequence.  
 | PS00017 ATP\_GTP\_A ATP/GTP-binding site motif A (P-loop).  
 | PS00719 GLYCOSYL\_HYDROL\_F2\_1 Glycosyl hydrolases family 2 signature 1.  
 | PS00608 GLYCOSYL\_HYDROL\_F2\_2 Glycosyl hydrolases family 2 acid/base catalyst.  
 >GL121 | [gene=GL121] [EC\_number=2.7.1.21] [protein=thymidine kinase]  
 | PS00005 PKC\_PHOSPHO\_SITE Protein kinase C phosphorylation site.  
 | PS00006 CK2\_PHOSPHO\_SITE Casein kinase II phosphorylation site.  
 | PS00603 TK\_CELLULAR\_TYPE Thymidine kinase cellular-type signature.  
 >GL122 | [gene=GL122] [EC\_number=2.1.1.57] [protein=multifunctional poly-A polymerase subunit]  
 | PS00001 ASN\_GLYCOSYLATION N-glycosylation site.  
 | PS00004 CAMP\_PHOSPHO\_SITE cAMP- and cGMP-dependent protein kinase phosphorylation site.  
 | PS00005 PKC\_PHOSPHO\_SITE Protein kinase C phosphorylation site.  
 | PS00006 CK2\_PHOSPHO\_SITE Casein kinase II phosphorylation site.  
 | PS00007 TYR\_PHOSPHO\_SITE Tyrosine kinase phosphorylation site.  
 | PS00008 MYRISTYL N-myristoylation site.  
 >GL123 | [gene=GL123] [EC\_number=2.7.7.6] [protein=DNA-dependent RNA polymerase subunit rpo22]  
 | PS00001 ASN\_GLYCOSYLATION N-glycosylation site.  
 | PS00005 PKC\_PHOSPHO\_SITE Protein kinase C phosphorylation site.  
 | PS00006 CK2\_PHOSPHO\_SITE Casein kinase II phosphorylation site.  
 | PS00007 TYR\_PHOSPHO\_SITE Tyrosine kinase phosphorylation site.  
 | PS00008 MYRISTYL N-myristoylation site.  
 | PS00009 AMIDATION Amidation site.  
 >GL124 | [gene=GL124] [EC\_number=no\_value] [protein=late 16kDa putative membrane protein]  
 | PS00001 ASN\_GLYCOSYLATION N-glycosylation site.  
 | PS00005 PKC\_PHOSPHO\_SITE Protein kinase C phosphorylation site.  
 | PS00006 CK2\_PHOSPHO\_SITE Casein kinase II phosphorylation site.  
 | PS00007 TYR\_PHOSPHO\_SITE Tyrosine kinase phosphorylation site.  
 | PS00008 MYRISTYL N-myristoylation site.  
 | PS00009 AMIDATION Amidation site.  
 | PS00001 ASN\_GLYCOSYLATION N-glycosylation site.  
 | PS00005 PKC\_PHOSPHO\_SITE Protein kinase C phosphorylation site.  
 | PS00006 CK2\_PHOSPHO\_SITE Casein kinase II phosphorylation site.  
 | PS00007 TYR\_PHOSPHO\_SITE Tyrosine kinase phosphorylation site.  
 | PS00008 MYRISTYL N-myristoylation site.  
 | PS00009 AMIDATION Amidation site.  
 >GL125 | [gene=GL125] [EC\_number=2.7.7.6] [protein=DNA-dependent RNA polymerase subunit rpo147]  
 | PS00001 ASN\_GLYCOSYLATION N-glycosylation site.  
 | PS00004 CAMP\_PHOSPHO\_SITE cAMP- and cGMP-dependent protein kinase phosphorylation site.  
 | PS00005 PKC\_PHOSPHO\_SITE Protein kinase C phosphorylation site.  
 | PS00006 CK2\_PHOSPHO\_SITE Casein kinase II phosphorylation site.  
 | PS00007 TYR\_PHOSPHO\_SITE Tyrosine kinase phosphorylation site.  
 | PS00008 MYRISTYL N-myristoylation site.  
 >GL126 | [gene=GL126] [protein=similar to putative H ORF A]  
 | PS00001 ASN\_GLYCOSYLATION N-glycosylation site.  
 | PS00005 PKC\_PHOSPHO\_SITE Protein kinase C phosphorylation site.  
 | PS00006 CK2\_PHOSPHO\_SITE Casein kinase II phosphorylation site.  
 >GL127 | [gene=GL127] [EC\_number=3.1.3.16] [protein=tyr/ser protein phosphatase]  
 | PS00001 ASN\_GLYCOSYLATION N-glycosylation site.  
 | PS00005 PKC\_PHOSPHO\_SITE Protein kinase C phosphorylation site.  
 | PS00006 CK2\_PHOSPHO\_SITE Casein kinase II phosphorylation site.  
 | PS00008 MYRISTYL N-myristoylation site.  
 | PS00383 TYR\_PHOSPHATASE\_1 Tyrosine specific protein phosphatases active site.  
 | PS50056 TYR\_PHOSPHATASE\_2 Tyrosine specific protein phosphatases family profile.  
 | PS50054 TYR\_PHOSPHATASE\_DUAL Dual specificity protein phosphatase family profile.  
 >GL128 | [gene=GL128] [protein=component of poxvirus multiprotein entry-fusion complex]  
 | PS00004 CAMP\_PHOSPHO\_SITE cAMP- and cGMP-dependent protein kinase phosphorylation site.  
 | PS00005 PKC\_PHOSPHO\_SITE Protein kinase C phosphorylation site.  
 | PS00006 CK2\_PHOSPHO\_SITE Casein kinase II phosphorylation site.  
 | PS00007 TYR\_PHOSPHO\_SITE Tyrosine kinase phosphorylation site.  
 | PS00008 MYRISTYL N-myristoylation site.  
 >GL129 | [gene=GL129] [protein=IMV heparin binding surface protein]  
 | PS00005 PKC\_PHOSPHO\_SITE Protein kinase C phosphorylation site.  
 | PS00006 CK2\_PHOSPHO\_SITE Casein kinase II phosphorylation site.  
 | PS00008 MYRISTYL N-myristoylation site.  
 >GL130 | [gene=GL130] [protein=RAP94, transcription factor]  
 | PS00001 ASN\_GLYCOSYLATION N-glycosylation site.  
 | PS00004 CAMP\_PHOSPHO\_SITE cAMP- and cGMP-dependent protein kinase phosphorylation site.  
 | PS00005 PKC\_PHOSPHO\_SITE Protein kinase C phosphorylation site.  
 | PS00006 CK2\_PHOSPHO\_SITE Casein kinase II phosphorylation site.  
 | PS00007 TYR\_PHOSPHO\_SITE Tyrosine kinase phosphorylation site.  
 | PS00008 MYRISTYL N-myristoylation site.  
 | PS00016 RGD Cell attachment sequence.  
 >GL131 | [gene=GL131] [protein=morphogenesis-related, substrate of B1R kinase, late gene transcription factor VLTf-4]  
 | PS00001 ASN\_GLYCOSYLATION N-glycosylation site.  
 | PS00004 CAMP\_PHOSPHO\_SITE cAMP- and cGMP-dependent protein kinase phosphorylation site.  
 | PS00005 PKC\_PHOSPHO\_SITE Protein kinase C phosphorylation site.  
 | PS00006 CK2\_PHOSPHO\_SITE Casein kinase II phosphorylation site.  
 >GL132 | [gene=GL132] [protein=topoisomerase type IB]  
 | PS00001 ASN\_GLYCOSYLATION N-glycosylation site.  
 | PS00004 CAMP\_PHOSPHO\_SITE cAMP- and cGMP-dependent protein kinase phosphorylation site.  
 | PS00005 PKC\_PHOSPHO\_SITE Protein kinase C phosphorylation site.  
 | PS00006 CK2\_PHOSPHO\_SITE Casein kinase II phosphorylation site.

| PS00007 TYR\_PHOSPHO\_SITE Tyrosine kinase phosphorylation site.  
 | PS00008 MYRISTYL N-myristoylation site.  
 | PS00009 AMIDATION Amidation site.  
 | PS00176 TOPOISOMERASE\_I\_EUK Eukaryotic DNA topoisomerase I active site.  
 >GL133 | [gene=GL133] [protein=unknown, orthologous to CPXV116]  
 | PS00005 PKC\_PHOSPHO\_SITE Protein kinase C phosphorylation site.  
 | PS00006 CK2\_PHOSPHO\_SITE Casein kinase II phosphorylation site.  
 >GL134 | [gene=GL134] [protein=unknown ]  
 | PS00001 ASN\_GLYCOSYLATION N-glycosylation site.  
 | PS00005 PKC\_PHOSPHO\_SITE Protein kinase C phosphorylation site.  
 | PS00006 CK2\_PHOSPHO\_SITE Casein kinase II phosphorylation site.  
 | PS00007 TYR\_PHOSPHO\_SITE Tyrosine kinase phosphorylation site.  
 >GL135 | [gene=GL135] [protein=large subunit of mRNA capping enzyme]  
 | PS00001 ASN\_GLYCOSYLATION N-glycosylation site.  
 | PS00004 CAMP\_PHOSPHO\_SITE cAMP- and cGMP-dependent protein kinase phosphorylation site.  
 | PS00005 PKC\_PHOSPHO\_SITE Protein kinase C phosphorylation site.  
 | PS00006 CK2\_PHOSPHO\_SITE Casein kinase II phosphorylation site.  
 | PS00007 TYR\_PHOSPHO\_SITE Tyrosine kinase phosphorylation site.  
 | PS00008 MYRISTYL N-myristoylation site.  
 >GL136 | [gene=GL136] [protein=hypothetical protein, orthologous to m0126L]  
 | PS00005 PKC\_PHOSPHO\_SITE Protein kinase C phosphorylation site.  
 | PS00006 CK2\_PHOSPHO\_SITE Casein kinase II phosphorylation site.  
 | PS00008 MYRISTYL N-myristoylation site.  
 >GL137 | [gene=GL137] [protein=virion core protein]  
 | PS00001 ASN\_GLYCOSYLATION N-glycosylation site.  
 | PS00004 CAMP\_PHOSPHO\_SITE cAMP- and cGMP-dependent protein kinase phosphorylation site.  
 | PS00005 PKC\_PHOSPHO\_SITE Protein kinase C phosphorylation site.  
 | PS00008 MYRISTYL N-myristoylation site.  
 >GL138 | [gene=GL138] [protein=similar to putative D ORF B]  
 | PS00001 ASN\_GLYCOSYLATION N-glycosylation site.  
 | PS00005 PKC\_PHOSPHO\_SITE Protein kinase C phosphorylation site.  
 | PS00008 MYRISTYL N-myristoylation site.  
 >GL139 | [gene=GL139] [protein=virion core protein]  
 | PS00001 ASN\_GLYCOSYLATION N-glycosylation site.  
 | PS00004 CAMP\_PHOSPHO\_SITE cAMP- and cGMP-dependent protein kinase phosphorylation site.  
 | PS00005 PKC\_PHOSPHO\_SITE Protein kinase C phosphorylation site.  
 | PS00006 CK2\_PHOSPHO\_SITE Casein kinase II phosphorylation site.  
 | PS00008 MYRISTYL N-myristoylation site.  
 >GL140 | [gene=GL140] [EC\_number=3.2.2.-] [protein=uracil-DNA glycosylase]  
 | PS00001 ASN\_GLYCOSYLATION N-glycosylation site.  
 | PS00005 PKC\_PHOSPHO\_SITE Protein kinase C phosphorylation site.  
 | PS00006 CK2\_PHOSPHO\_SITE Casein kinase II phosphorylation site.  
 | PS00130 U\_DNA\_GLYCOSYLASE Uracil-DNA glycosylase signature.  
 >GL141 | [gene=GL141] [protein=similar to putative D ORF C]  
 | PS00001 ASN\_GLYCOSYLATION N-glycosylation site.  
 | PS00005 PKC\_PHOSPHO\_SITE Protein kinase C phosphorylation site.  
 | PS00008 MYRISTYL N-myristoylation site.  
 >GL142 | [gene=GL142] [EC\_number=3.6.1.15] [protein=NTPase interacts with A20R]  
 | PS00001 ASN\_GLYCOSYLATION N-glycosylation site.  
 | PS00004 CAMP\_PHOSPHO\_SITE cAMP- and cGMP-dependent protein kinase phosphorylation site.  
 | PS00005 PKC\_PHOSPHO\_SITE Protein kinase C phosphorylation site.  
 | PS00006 CK2\_PHOSPHO\_SITE Casein kinase II phosphorylation site.  
 | PS00008 MYRISTYL N-myristoylation site.  
 | PS00893 NUDIX Nudix hydrolase signature.  
 | PS00006 CK2\_PHOSPHO\_SITE Casein kinase II phosphorylation site.  
 | PS00007 TYR\_PHOSPHO\_SITE Tyrosine kinase phosphorylation site.  
 | PS00008 MYRISTYL N-myristoylation site.  
 | PS00016 RGD Cell attachment sequence.  
 | PS00017 ATP\_GTP\_A ATP/GTP-binding site motif A (P-loop).  
 | PS51206 SF3\_HELICASE\_1 Superfamily 3 helicase of DNA viruses domain profile.  
 >GL143 | [gene=GL143] [protein=similar to putative D ORF D]  
 | PS00001 ASN\_GLYCOSYLATION N-glycosylation site.  
 | PS00005 PKC\_PHOSPHO\_SITE Protein kinase C phosphorylation site.  
 | PS00008 MYRISTYL N-myristoylation site.  
 >GL144 | [gene=GL144] [protein=similar to putative D ORF E]  
 | PS00005 PKC\_PHOSPHO\_SITE Protein kinase C phosphorylation site.  
 | PS00006 CK2\_PHOSPHO\_SITE Casein kinase II phosphorylation site.  
 | PS00008 MYRISTYL N-myristoylation site.  
 >GL145 | [gene=GL145] [EC\_number=3.2.2.-] [protein=70kDa small subunit of early gene transcription factor VETF]  
 | PS00001 ASN\_GLYCOSYLATION N-glycosylation site.  
 | PS00004 CAMP\_PHOSPHO\_SITE cAMP- and cGMP-dependent protein kinase phosphorylation site.  
 | PS00005 PKC\_PHOSPHO\_SITE Protein kinase C phosphorylation site.  
 | PS00006 CK2\_PHOSPHO\_SITE Casein kinase II phosphorylation site.  
 | PS00007 TYR\_PHOSPHO\_SITE Tyrosine kinase phosphorylation site.  
 | PS00008 MYRISTYL N-myristoylation site.  
 | PS00009 AMIDATION Amidation site.  
 | PS51192 HELICASE\_ATP\_BIND\_1 Superfamilies 1 and 2 helicase ATP-binding type-1 domain profile.  
 | PS51194 HELICASE\_CTER Superfamilies 1 and 2 helicase C-terminal domain profile.  
 | PS00690 DEAH\_ATP\_HELICASE DEAH-box subfamily ATP-dependent helicases signature.  
 >GL146 | [gene=GL146] [protein=hypothetical protein, orthologous to m0136L]  
 | PS00001 ASN\_GLYCOSYLATION N-glycosylation site.  
 | PS00092 N6\_MTASE N-6 Adenine-specific DNA methylases signature.  
 >GL147 | [gene=GL147] [EC\_number=2.7.7.6] [protein=DNA-dependent RNA polymerase subunit rpo18]  
 | PS00001 ASN\_GLYCOSYLATION N-glycosylation site.  
 | PS00005 PKC\_PHOSPHO\_SITE Protein kinase C phosphorylation site.  
 | PS00006 CK2\_PHOSPHO\_SITE Casein kinase II phosphorylation site.  
 | PS00008 MYRISTYL N-myristoylation site.  
 >GL148 | [gene=GL148] [protein=IMV membrane protein]  
 | PS00001 ASN\_GLYCOSYLATION N-glycosylation site.  
 | PS00004 CAMP\_PHOSPHO\_SITE cAMP- and cGMP-dependent protein kinase phosphorylation site.  
 | PS00005 PKC\_PHOSPHO\_SITE Protein kinase C phosphorylation site.  
 | PS00006 CK2\_PHOSPHO\_SITE Casein kinase II phosphorylation site.  
 | PS00007 TYR\_PHOSPHO\_SITE Tyrosine kinase phosphorylation site.  
 | PS00008 MYRISTYL N-myristoylation site.  
 | PS51144 ALPHA\_CA\_2 Alpha-carbonic anhydrases profile.  
 >GL149 | [gene=GL149] [protein=contains mutT-like motif of NTP-phosphohydrolase for DNA repair]  
 | PS00001 ASN\_GLYCOSYLATION N-glycosylation site.  
 | PS00004 CAMP\_PHOSPHO\_SITE cAMP- and cGMP-dependent protein kinase phosphorylation site.  
 | PS00005 PKC\_PHOSPHO\_SITE Protein kinase C phosphorylation site.  
 | PS00006 CK2\_PHOSPHO\_SITE Casein kinase II phosphorylation site.  
 | PS00008 MYRISTYL N-myristoylation site.  
 | PS00893 NUDIX Nudix hydrolase signature.

>GL150 | [gene=GL150] [EC\_number=3.6.1.-] [protein=contains mutT-like motif of NTP-phosphohydrolase for DNA repair]  
 | PS00001 ASN\_GLYCOSYLATION N-glycosylation site.  
 | PS00004 CAMP\_PHOSPHO\_SITE cAMP- and cGMP-dependent protein kinase phosphorylation site.  
 | PS00005 PKC\_PHOSPHO\_SITE Protein kinase C phosphorylation site.  
 | PS00006 CK2\_PHOSPHO\_SITE Casein kinase II phosphorylation site.  
 | PS00893 NUDIX Nudix hydrolase signature.

>GL151 | [gene=GL151] [EC\_number=3.6.1.15] [protein=ATPase, nucleoside triphosphate phosphohydrolase-I, NPH-I]  
 | PS00001 ASN\_GLYCOSYLATION N-glycosylation site.  
 | PS00004 CAMP\_PHOSPHO\_SITE cAMP- and cGMP-dependent protein kinase phosphorylation site.  
 | PS00005 PKC\_PHOSPHO\_SITE Protein kinase C phosphorylation site.  
 | PS00006 CK2\_PHOSPHO\_SITE Casein kinase II phosphorylation site.  
 | PS00007 TYR\_PHOSPHO\_SITE Tyrosine kinase phosphorylation site.  
 | PS00008 MYRISTYL N-myristoylation site.  
 | PS51192 HELICASE\_ATP\_BIND\_1 Superfamilies 1 and 2 helicase ATP-binding type-1 domain profile.  
 | PS51194 HELICASE\_CTER Superfamilies 1 and 2 helicase C-terminal domain profile.

>GL152 | [gene=GL152] [protein=similar to putative D ORF F]  
 | PS00005 PKC\_PHOSPHO\_SITE Protein kinase C phosphorylation site.  
 | PS00006 CK2\_PHOSPHO\_SITE Casein kinase II phosphorylation site.

>GL153 | [gene=GL153] [protein=similar to putative D ORF G]  
 | PS00005 PKC\_PHOSPHO\_SITE Protein kinase C phosphorylation site.

>GL154 | [gene=GL154] [protein=hypothetical 7.2KDa protein]  
 | PS00005 PKC\_PHOSPHO\_SITE Protein kinase C phosphorylation site.  
 | PS00006 CK2\_PHOSPHO\_SITE Casein kinase II phosphorylation site.

>GL155 | [gene=GL155] [EC\_number=2.1.1.56] [protein=small subunit of mRNA capping enzyme]  
 | PS00001 ASN\_GLYCOSYLATION N-glycosylation site.  
 | PS00005 PKC\_PHOSPHO\_SITE Protein kinase C phosphorylation site.  
 | PS00006 CK2\_PHOSPHO\_SITE Casein kinase II phosphorylation site.  
 | PS00007 TYR\_PHOSPHO\_SITE Tyrosine kinase phosphorylation site.  
 | PS00008 MYRISTYL N-myristoylation site.

>GL156 | [gene=GL156] [protein=hypothetical 7.0KDa protein, orthologous to m0145R]  
 | PS00001 ASN\_GLYCOSYLATION N-glycosylation site.  
 | PS00005 PKC\_PHOSPHO\_SITE Protein kinase C phosphorylation site.  
 | PS00029 LEUCINE\_ZIPPER Leucine zipper pattern.

>GL157 | [gene=GL157] [protein=unknown, orthologous to unknown protein]  
 | PS00001 ASN\_GLYCOSYLATION N-glycosylation site.  
 | PS00005 PKC\_PHOSPHO\_SITE Protein kinase C phosphorylation site.  
 | PS00006 CK2\_PHOSPHO\_SITE Casein kinase II phosphorylation site.  
 | PS00007 TYR\_PHOSPHO\_SITE Tyrosine kinase phosphorylation site.  
 | PS00008 MYRISTYL N-myristoylation site.

>GL158 | [gene=GL158] [EC\_number=\_no\_value] [protein=rifampicin resistance protein]  
 | PS00001 ASN\_GLYCOSYLATION N-glycosylation site.  
 | PS00004 CAMP\_PHOSPHO\_SITE cAMP- and cGMP-dependent protein kinase phosphorylation site.  
 | PS00005 PKC\_PHOSPHO\_SITE Protein kinase C phosphorylation site.  
 | PS00006 CK2\_PHOSPHO\_SITE Casein kinase II phosphorylation site.  
 | PS00007 TYR\_PHOSPHO\_SITE Tyrosine kinase phosphorylation site.  
 | PS00008 MYRISTYL N-myristoylation site.

>GL159 | [gene=GL159] [protein=similar to putative D ORF I]  
 | PS00001 ASN\_GLYCOSYLATION N-glycosylation site.

| PS00004 CAMP\_PHOSPHO\_SITE cAMP- and cGMP-dependent protein kinase phosphorylation site.  
 | PS00005 PKC\_PHOSPHO\_SITE Protein kinase C phosphorylation site.  
 | PS00006 CK2\_PHOSPHO\_SITE Casein kinase II phosphorylation site.

>GL160 | [gene=GL160] [protein=late gene transcription factor VLTF-2]  
 | PS00004 CAMP\_PHOSPHO\_SITE cAMP- and cGMP-dependent protein kinase phosphorylation site.  
 | PS00005 PKC\_PHOSPHO\_SITE Protein kinase C phosphorylation site.  
 | PS00006 CK2\_PHOSPHO\_SITE Casein kinase II phosphorylation site.  
 | PS00007 TYR\_PHOSPHO\_SITE Tyrosine kinase phosphorylation site.  
 | PS00008 MYRISTYL N-myristoylation site.

>GL161 | [gene=GL161] [protein=late gene transcription factor VLTF-3]  
 | PS00001 ASN\_GLYCOSYLATION N-glycosylation site.  
 | PS00004 CAMP\_PHOSPHO\_SITE cAMP- and cGMP-dependent protein kinase phosphorylation site.  
 | PS00005 PKC\_PHOSPHO\_SITE Protein kinase C phosphorylation site.  
 | PS00006 CK2\_PHOSPHO\_SITE Casein kinase II phosphorylation site.  
 | PS00008 MYRISTYL N-myristoylation site.

>GL162 | [gene=GL162] [EC\_number=\_no\_value] [protein=S-S bond formation pathway]  
 | PS00001 ASN\_GLYCOSYLATION N-glycosylation site.  
 | PS00004 CAMP\_PHOSPHO\_SITE cAMP- and cGMP-dependent protein kinase phosphorylation site.  
 | PS00005 PKC\_PHOSPHO\_SITE Protein kinase C phosphorylation site.  
 | PS00006 CK2\_PHOSPHO\_SITE Casein kinase II phosphorylation site.

>GL163 | [gene=GL163] [protein=p4b precursor of core protein 4b]  
 | PS00001 ASN\_GLYCOSYLATION N-glycosylation site.  
 | PS00004 CAMP\_PHOSPHO\_SITE cAMP- and cGMP-dependent protein kinase phosphorylation site.  
 | PS00005 PKC\_PHOSPHO\_SITE Protein kinase C phosphorylation site.  
 | PS00006 CK2\_PHOSPHO\_SITE Casein kinase II phosphorylation site.  
 | PS00007 TYR\_PHOSPHO\_SITE Tyrosine kinase phosphorylation site.  
 | PS00008 MYRISTYL N-myristoylation site.

>GL164 | [gene=GL164] [protein=similar to putative A ORF A]  
 | PS00001 ASN\_GLYCOSYLATION N-glycosylation site.  
 | PS00005 PKC\_PHOSPHO\_SITE Protein kinase C phosphorylation site.  
 | PS00008 MYRISTYL N-myristoylation site.

>GL165 | [gene=GL165] [protein=39kDa core protein]  
 | PS00001 ASN\_GLYCOSYLATION N-glycosylation site.  
 | PS00005 PKC\_PHOSPHO\_SITE Protein kinase C phosphorylation site.  
 | PS00006 CK2\_PHOSPHO\_SITE Casein kinase II phosphorylation site.  
 | PS00007 TYR\_PHOSPHO\_SITE Tyrosine kinase phosphorylation site.  
 | PS00008 MYRISTYL N-myristoylation site.  
 | PS50325 THR\_RICH Threonine-rich region profile.

>GL166 | [gene=GL166] [protein=unknown, orthologous to unknown protein]  
 | PS00342 MICROBODIES\_CTER Microbodies C-terminal targeting signal.  
 | PS00029 LEUCINE\_ZIPPER Leucine zipper pattern.

>GL167 | [gene=GL167] [EC\_number=2.7.7.6] [protein=DNA-dependent RNA polymerase subunit rpo19]  
 | PS00004 CAMP\_PHOSPHO\_SITE cAMP- and cGMP-dependent protein kinase phosphorylation site.  
 | PS00005 PKC\_PHOSPHO\_SITE Protein kinase C phosphorylation site.  
 | PS00006 CK2\_PHOSPHO\_SITE Casein kinase II phosphorylation site.  
 | PS00008 MYRISTYL N-myristoylation site.

>GL168 | [gene=GL168] [protein=virion core protein required for virus formation]  
 | PS00001 ASN\_GLYCOSYLATION N-glycosylation site.

| PS00005 PKC\_PHOSPHO\_SITE Protein kinase C phosphorylation site.  
 | PS00006 CK2\_PHOSPHO\_SITE Casein kinase II phosphorylation site.  
 | PS00007 TYR\_PHOSPHO\_SITE Tyrosine kinase phosphorylation site.  
 | PS00008 MYRISTYL N-myristoylation site.  
 >GL169 | [gene=GL169] [protein=82kDa large subunit of early gene transcription factor VETF]  
 | PS00001 ASN\_GLYCOSYLATION N-glycosylation site.  
 | PS00004 CAMP\_PHOSPHO\_SITE cAMP- and cGMP-dependent protein kinase phosphorylation site.  
 | PS00005 PKC\_PHOSPHO\_SITE Protein kinase C phosphorylation site.  
 | PS00006 CK2\_PHOSPHO\_SITE Casein kinase II phosphorylation site.  
 | PS00007 TYR\_PHOSPHO\_SITE Tyrosine kinase phosphorylation site.  
 | PS00008 MYRISTYL N-myristoylation site.  
 | PS00009 AMIDATION Amidation site.  
 >GL170 | [gene=GL170] [protein=similar to putative A ORF C]  
 | PS00001 ASN\_GLYCOSYLATION N-glycosylation site.  
 | PS00005 PKC\_PHOSPHO\_SITE Protein kinase C phosphorylation site.  
 | PS00006 CK2\_PHOSPHO\_SITE Casein kinase II phosphorylation site.  
 | PS00008 MYRISTYL N-myristoylation site.  
 >GL171 | [gene=GL171] [protein=similar to putative A ORF D]  
 | PS00001 ASN\_GLYCOSYLATION N-glycosylation site.  
 | PS00004 CAMP\_PHOSPHO\_SITE cAMP- and cGMP-dependent protein kinase phosphorylation site.  
 | PS00005 PKC\_PHOSPHO\_SITE Protein kinase C phosphorylation site.  
 | PS00006 CK2\_PHOSPHO\_SITE Casein kinase II phosphorylation site.  
 | PS00008 MYRISTYL N-myristoylation site.  
 >GL172 | [gene=GL172] [protein=32kDa small subunit of transcription factor VITF-3]  
 | PS00001 ASN\_GLYCOSYLATION N-glycosylation site.  
 | PS00004 CAMP\_PHOSPHO\_SITE cAMP- and cGMP-dependent protein kinase phosphorylation site.  
 | PS00005 PKC\_PHOSPHO\_SITE Protein kinase C phosphorylation site.  
 | PS00006 CK2\_PHOSPHO\_SITE Casein kinase II phosphorylation site.  
 | PS00008 MYRISTYL N-myristoylation site.  
 >GL173 | [gene=GL173] [protein=IMV membrane protein]  
 | PS00001 ASN\_GLYCOSYLATION N-glycosylation site.  
 | PS00004 CAMP\_PHOSPHO\_SITE cAMP- and cGMP-dependent protein kinase phosphorylation site.  
 | PS00005 PKC\_PHOSPHO\_SITE Protein kinase C phosphorylation site.  
 | PS00006 CK2\_PHOSPHO\_SITE Casein kinase II phosphorylation site.  
 | PS50321 ASN\_RICH Asparagine-rich region profile.  
 >GL174 | [gene=GL174] [protein=precursor p4a of core protein 4a]  
 | PS00001 ASN\_GLYCOSYLATION N-glycosylation site.  
 | PS00004 CAMP\_PHOSPHO\_SITE cAMP- and cGMP-dependent protein kinase phosphorylation site.  
 | PS00005 PKC\_PHOSPHO\_SITE Protein kinase C phosphorylation site.  
 | PS00006 CK2\_PHOSPHO\_SITE Casein kinase II phosphorylation site.  
 | PS00007 TYR\_PHOSPHO\_SITE Tyrosine kinase phosphorylation site.  
 | PS00008 MYRISTYL N-myristoylation site.  
 >GL175 | [gene=GL175] [protein=similar to putative A ORF E]  
 | PS00006 CK2\_PHOSPHO\_SITE Casein kinase II phosphorylation site.  
 >GL176 | [gene=GL176] [protein=similar to putative A ORF F]  
 | PS00005 PKC\_PHOSPHO\_SITE Protein kinase C phosphorylation site.  
 | PS00008 MYRISTYL N-myristoylation site.  
 >GL177 | [gene=GL177] [protein=similar to putative A ORF G]  
 | PS00005 PKC\_PHOSPHO\_SITE Protein kinase C phosphorylation site.  
 | PS00006 CK2\_PHOSPHO\_SITE Casein kinase II phosphorylation site.

>GL178 | [gene=GL178] [protein=viral membranes formation]  
 | PS00001 ASN\_GLYCOSYLATION N-glycosylation site.  
 | PS00005 PKC\_PHOSPHO\_SITE Protein kinase C phosphorylation site.  
 | PS00006 CK2\_PHOSPHO\_SITE Casein kinase II phosphorylation site.  
 | PS00008 MYRISTYL N-myristoylation site.  
 >GL179 | [gene=GL179] [protein=core protein]  
 | PS00001 ASN\_GLYCOSYLATION N-glycosylation site.  
 | PS00004 CAMP\_PHOSPHO\_SITE cAMP- and cGMP-dependent protein kinase phosphorylation site.  
 | PS00005 PKC\_PHOSPHO\_SITE Protein kinase C phosphorylation site.  
 | PS00006 CK2\_PHOSPHO\_SITE Casein kinase II phosphorylation site.  
 | PS00008 MYRISTYL N-myristoylation site.  
 | PS00009 AMIDATION Amidation site.  
 >GL180 | [gene=GL180] [protein=IMV membrane protein]  
 | PS00008 MYRISTYL N-myristoylation site.  
 >GL181 | [gene=GL181] [protein=phosphorylated IMV membrane protein]  
 | PS00001 ASN\_GLYCOSYLATION N-glycosylation site.  
 | PS00005 PKC\_PHOSPHO\_SITE Protein kinase C phosphorylation site.  
 | PS00008 MYRISTYL N-myristoylation site.  
 >GL182 | [gene=GL182] [protein=nonessential hydrophobic IV and IMV membrane protein]  
 | PS00001 ASN\_GLYCOSYLATION N-glycosylation site.  
 | PS00005 PKC\_PHOSPHO\_SITE Protein kinase C phosphorylation site.  
 | PS00006 CK2\_PHOSPHO\_SITE Casein kinase II phosphorylation site.  
 >GL183 | [gene=GL183] [protein=unknown]  
 | PS00001 ASN\_GLYCOSYLATION N-glycosylation site.  
 | PS00005 PKC\_PHOSPHO\_SITE Protein kinase C phosphorylation site.  
 | PS00006 CK2\_PHOSPHO\_SITE Casein kinase II phosphorylation site.  
 >GL184 | [gene=GL184] [EC\_number=\_no\_value] [protein=soluble myristylprotein]  
 | PS00001 ASN\_GLYCOSYLATION N-glycosylation site.  
 | PS00005 PKC\_PHOSPHO\_SITE Protein kinase C phosphorylation site.  
 | PS00006 CK2\_PHOSPHO\_SITE Casein kinase II phosphorylation site.  
 | PS00007 TYR\_PHOSPHO\_SITE Tyrosine kinase phosphorylation site.  
 | PS00008 MYRISTYL N-myristoylation site.  
 >GL185 | [gene=GL185] [protein=IMV membrane protein]  
 | PS00001 ASN\_GLYCOSYLATION N-glycosylation site.  
 | PS00006 CK2\_PHOSPHO\_SITE Casein kinase II phosphorylation site.  
 | PS00008 MYRISTYL N-myristoylation site.  
 >GL186 | [gene=GL186] [EC\_number=3.1.21.5] [protein=DNA helicase]  
 | PS00001 ASN\_GLYCOSYLATION N-glycosylation site.  
 | PS00004 CAMP\_PHOSPHO\_SITE cAMP- and cGMP-dependent protein kinase phosphorylation site.  
 | PS00005 PKC\_PHOSPHO\_SITE Protein kinase C phosphorylation site.  
 | PS00006 CK2\_PHOSPHO\_SITE Casein kinase II phosphorylation site.  
 | PS00008 MYRISTYL N-myristoylation site.  
 | PS00009 AMIDATION Amidation site.  
 | PS51192 HELICASE\_ATP\_BIND\_1 Superfamilies 1 and 2 helicase ATP-binding type-1 domain profile.  
 >GL187 | [gene=GL187] [protein=unknown]  
 | PS00005 PKC\_PHOSPHO\_SITE Protein kinase C phosphorylation site.  
 | PS00006 CK2\_PHOSPHO\_SITE Casein kinase II phosphorylation site.  
 | PS00008 MYRISTYL N-myristoylation site.  
 >GL188 | [gene=GL188] [protein=Component of poxvirus multiprotein entry-fusion complex]  
 | PS00001 ASN\_GLYCOSYLATION N-glycosylation site.  
 | PS00005 PKC\_PHOSPHO\_SITE Protein kinase C phosphorylation site.  
 | PS00007 TYR\_PHOSPHO\_SITE Tyrosine kinase phosphorylation site.

>GL189 | [gene=GL189] [protein=viral DNA polymerase processivity factor]  
 | PS00001 ASN\_GLYCOSYLATION N-glycosylation site.  
 | PS00004 CAMP\_PHOSPHO\_SITE cAMP- and cGMP-dependent protein kinase phosphorylation site.  
 | PS00005 PKC\_PHOSPHO\_SITE Protein kinase C phosphorylation site.  
 | PS00006 CK2\_PHOSPHO\_SITE Casein kinase II phosphorylation site.  
 | PS00008 MYRISTYL N-myristoylation site.  
 | PS00009 AMIDATION Amidation site.

>GL190 | [gene=GL190] [protein=similar to putative A ORF H]  
 | PS00001 ASN\_GLYCOSYLATION N-glycosylation site.  
 | PS00004 CAMP\_PHOSPHO\_SITE cAMP- and cGMP-dependent protein kinase phosphorylation site.  
 | PS00005 PKC\_PHOSPHO\_SITE Protein kinase C phosphorylation site.  
 | PS00006 CK2\_PHOSPHO\_SITE Casein kinase II phosphorylation site.  
 | PS00008 MYRISTYL N-myristoylation site.

>GL191 | [gene=GL191] [protein=similar to putative A ORF I]  
 | PS00001 ASN\_GLYCOSYLATION N-glycosylation site.  
 | PS00006 CK2\_PHOSPHO\_SITE Casein kinase II phosphorylation site.

>GL192 | [gene=GL192] [EC\_number=3.1.-.-] [protein=late protein essential for concatemer resolution cleaving DNA concatamers to yield unit-length genome, DNA holiday junction (HJ) resolvase]  
 | PS00004 CAMP\_PHOSPHO\_SITE cAMP- and cGMP-dependent protein kinase phosphorylation site.  
 | PS00005 PKC\_PHOSPHO\_SITE Protein kinase C phosphorylation site.  
 | PS00006 CK2\_PHOSPHO\_SITE Casein kinase II phosphorylation site.  
 | PS00007 TYR\_PHOSPHO\_SITE Tyrosine kinase phosphorylation site.  
 | PS00008 MYRISTYL N-myristoylation site.

>GL193 | [gene=GL193] [protein=45kDa large subunit of intermediate gene transcription factor VITF-3]  
 | PS00001 ASN\_GLYCOSYLATION N-glycosylation site.  
 | PS00005 PKC\_PHOSPHO\_SITE Protein kinase C phosphorylation site.  
 | PS00006 CK2\_PHOSPHO\_SITE Casein kinase II phosphorylation site.  
 | PS00007 TYR\_PHOSPHO\_SITE Tyrosine kinase phosphorylation site.  
 | PS00008 MYRISTYL N-myristoylation site.  
 | PS00009 AMIDATION Amidation site.

>GL194 | [gene=GL194] [EC\_number=2.7.7.6] [protein=DNA-dependent RNA polymerase subunit rpo132]  
 | PS00001 ASN\_GLYCOSYLATION N-glycosylation site.  
 | PS00004 CAMP\_PHOSPHO\_SITE cAMP- and cGMP-dependent protein kinase phosphorylation site.  
 | PS00005 PKC\_PHOSPHO\_SITE Protein kinase C phosphorylation site.  
 | PS00006 CK2\_PHOSPHO\_SITE Casein kinase II phosphorylation site.  
 | PS00007 TYR\_PHOSPHO\_SITE Tyrosine kinase phosphorylation site.  
 | PS00008 MYRISTYL N-myristoylation site.  
 | PS00009 AMIDATION Amidation site.  
 | PS00029 LEUCINE\_ZIPPER Leucine zipper pattern.  
 | PS01166 RNA\_POL\_BETA RNA polymerases beta chain signature.

>GL195 | [gene=GL195] [protein=similar to putative A ORF J]  
 | PS00005 PKC\_PHOSPHO\_SITE Protein kinase C phosphorylation site.  
 | PS00008 MYRISTYL N-myristoylation site.

>GL196 | [gene=GL196] [EC\_number=\_no\_value] [protein=Cow-pox A-type inclusion protein]  
 | PS00001 ASN\_GLYCOSYLATION N-glycosylation site.  
 | PS00005 PKC\_PHOSPHO\_SITE Protein kinase C phosphorylation site.  
 | PS00006 CK2\_PHOSPHO\_SITE Casein kinase II phosphorylation site.  
 | PS00007 TYR\_PHOSPHO\_SITE Tyrosine kinase phosphorylation site.

| PS00008 MYRISTYL N-myristoylation site.

>GL197 | [gene=GL197] [protein=cowpox A-type inclusion protein]  
 | PS00001 ASN\_GLYCOSYLATION N-glycosylation site.  
 | PS00005 PKC\_PHOSPHO\_SITE Protein kinase C phosphorylation site.  
 | PS00006 CK2\_PHOSPHO\_SITE Casein kinase II phosphorylation site.  
 | PS00007 TYR\_PHOSPHO\_SITE Tyrosine kinase phosphorylation site.  
 | PS00008 MYRISTYL N-myristoylation site.

>GL198 | [gene=GL198] [protein=unknown, orthologous to TAZ8R]  
 | PS00001 ASN\_GLYCOSYLATION N-glycosylation site.  
 | PS00005 PKC\_PHOSPHO\_SITE Protein kinase C phosphorylation site.  
 | PS00006 CK2\_PHOSPHO\_SITE Casein kinase II phosphorylation site.

>GL199 | [gene=GL199] [protein=cowpox A-type inclusion protein]  
 | PS00001 ASN\_GLYCOSYLATION N-glycosylation site.  
 | PS00004 CAMP\_PHOSPHO\_SITE cAMP- and cGMP-dependent protein kinase phosphorylation site.  
 | PS00005 PKC\_PHOSPHO\_SITE Protein kinase C phosphorylation site.  
 | PS00006 CK2\_PHOSPHO\_SITE Casein kinase II phosphorylation site.  
 | PS00007 TYR\_PHOSPHO\_SITE Tyrosine kinase phosphorylation site.  
 | PS00008 MYRISTYL N-myristoylation site.

>GL200 | [gene=GL200] [protein=hypothetical protein, orthologous to m0188R]  
 | PS00001 ASN\_GLYCOSYLATION N-glycosylation site.  
 | PS00005 PKC\_PHOSPHO\_SITE Protein kinase C phosphorylation site.

>GL201 | [gene=GL201] [protein=cowpox A-type inclusion protein]  
 | PS00001 ASN\_GLYCOSYLATION N-glycosylation site.  
 | PS00005 PKC\_PHOSPHO\_SITE Protein kinase C phosphorylation site.  
 | PS00006 CK2\_PHOSPHO\_SITE Casein kinase II phosphorylation site.  
 | PS00007 TYR\_PHOSPHO\_SITE Tyrosine kinase phosphorylation site.  
 | PS00008 MYRISTYL N-myristoylation site.  
 | PS50099 PRO\_RICH Proline-rich region profile.

>GL202 | [gene=GL202] [protein=hypothetical protein, orthologous to m0190R]  
 | PS00001 ASN\_GLYCOSYLATION N-glycosylation site.  
 | PS00004 CAMP\_PHOSPHO\_SITE cAMP- and cGMP-dependent protein kinase phosphorylation site.  
 | PS00005 PKC\_PHOSPHO\_SITE Protein kinase C phosphorylation site.  
 | PS00006 CK2\_PHOSPHO\_SITE Casein kinase II phosphorylation site.  
 | PS00009 AMIDATION Amidation site.  
 | PS50317 ILE\_RICH Isoleucine-rich region profile.

>GL203 | [gene=GL203] [protein=IMV surface protein]  
 | PS00001 ASN\_GLYCOSYLATION N-glycosylation site.  
 | PS00004 CAMP\_PHOSPHO\_SITE cAMP- and cGMP-dependent protein kinase phosphorylation site.  
 | PS00005 PKC\_PHOSPHO\_SITE Protein kinase C phosphorylation site.  
 | PS00006 CK2\_PHOSPHO\_SITE Casein kinase II phosphorylation site.  
 | PS00009 AMIDATION Amidation site.

>GL204 | [gene=GL204] [protein=membrane component of IMV]  
 | PS00001 ASN\_GLYCOSYLATION N-glycosylation site.  
 | PS00005 PKC\_PHOSPHO\_SITE Protein kinase C phosphorylation site.  
 | PS00006 CK2\_PHOSPHO\_SITE Casein kinase II phosphorylation site.  
 | PS00008 MYRISTYL N-myristoylation site.

>GL205 | [gene=GL205] [EC\_number=2.7.7.6] [protein=DNA-dependent RNA polymerase rpo35]  
 | PS00001 ASN\_GLYCOSYLATION N-glycosylation site.  
 | PS00005 PKC\_PHOSPHO\_SITE Protein kinase C phosphorylation site.  
 | PS00006 CK2\_PHOSPHO\_SITE Casein kinase II phosphorylation site.  
 | PS00007 TYR\_PHOSPHO\_SITE Tyrosine kinase phosphorylation site.  
 | PS00008 MYRISTYL N-myristoylation site.



| PS00342 MICROBODIES\_CTER Microbodies C-terminal targeting signal.  
 >GL206 | [gene=GL206] [protein=similar to putative A ORF K]  
 | PS00005 PKC\_PHOSPHO\_SITE Protein kinase C phosphorylation site.  
 | PS00006 CK2\_PHOSPHO\_SITE Casein kinase II phosphorylation site.  
 | PS00008 MYRISTYL N-myristoylation site.  
 >GL207 | [gene=GL207] [protein=IMV protein]  
 | PS00001 ASN\_GLYCOSYLATION N-glycosylation site.  
 | PS00004 CAMP\_PHOSPHO\_SITE cAMP- and cGMP-dependent protein kinase phosphorylation site.  
 | PS00005 PKC\_PHOSPHO\_SITE Protein kinase C phosphorylation site.  
 | PS00007 TYR\_PHOSPHO\_SITE Tyrosine kinase phosphorylation site.  
 >GL207.5 | [gene=GL207.5] [protein=late promoter element in transfected cell]  
 | PS00001 ASN\_GLYCOSYLATION N-glycosylation site.  
 | PS00005 PKC\_PHOSPHO\_SITE Protein kinase C phosphorylation site.  
 | PS00006 CK2\_PHOSPHO\_SITE Casein kinase II phosphorylation site.  
 >GL208 | [gene=GL208] [protein=unknown ]  
 | PS00001 ASN\_GLYCOSYLATION N-glycosylation site.  
 | PS00005 PKC\_PHOSPHO\_SITE Protein kinase C phosphorylation site.  
 | PS00006 CK2\_PHOSPHO\_SITE Casein kinase II phosphorylation site.  
 | PS00008 MYRISTYL N-myristoylation site.  
 >GL209 | [gene=GL209] [protein=putative ATPase]  
 | PS00001 ASN\_GLYCOSYLATION N-glycosylation site.  
 | PS00005 PKC\_PHOSPHO\_SITE Protein kinase C phosphorylation site.  
 | PS00006 CK2\_PHOSPHO\_SITE Casein kinase II phosphorylation site.  
 | PS00008 MYRISTYL N-myristoylation site.  
 | PS00009 AMIDATION Amidation site.  
 | PS00017 ATP\_GTP\_A ATP/GTP-binding site motif A (P-loop).  
 >GL210 | [gene=GL210] [protein=putative A ORF L]  
 | PS00001 ASN\_GLYCOSYLATION N-glycosylation site.  
 | PS00005 PKC\_PHOSPHO\_SITE Protein kinase C phosphorylation site.  
 | PS00006 CK2\_PHOSPHO\_SITE Casein kinase II phosphorylation site.  
 | PS00008 MYRISTYL N-myristoylation site.  
 >GL211 | [gene=GL211] [protein=EEV membrane phosphoglycoprotein]  
 | PS00001 ASN\_GLYCOSYLATION N-glycosylation site.  
 | PS00005 PKC\_PHOSPHO\_SITE Protein kinase C phosphorylation site.  
 | PS00006 CK2\_PHOSPHO\_SITE Casein kinase II phosphorylation site.  
 | PS00008 MYRISTYL N-myristoylation site.  
 >GL212 | [gene=GL212] [protein=EEV glycoprotein]  
 | PS00001 ASN\_GLYCOSYLATION N-glycosylation site.  
 | PS00004 CAMP\_PHOSPHO\_SITE cAMP- and cGMP-dependent protein kinase phosphorylation site.  
 | PS00005 PKC\_PHOSPHO\_SITE Protein kinase C phosphorylation site.  
 | PS00006 CK2\_PHOSPHO\_SITE Casein kinase II phosphorylation site.  
 | PS00007 TYR\_PHOSPHO\_SITE Tyrosine kinase phosphorylation site.  
 >GL213 | [gene=GL213] [protein=similar to putative A ORF M]  
 | PS00001 ASN\_GLYCOSYLATION N-glycosylation site.  
 | PS00006 CK2\_PHOSPHO\_SITE Casein kinase II phosphorylation site.  
 | PS00008 MYRISTYL N-myristoylation site.  
 >GL214 | [gene=GL214] [protein=intracellular protein of virulence]  
 | PS00001 ASN\_GLYCOSYLATION N-glycosylation site.  
 | PS00005 PKC\_PHOSPHO\_SITE Protein kinase C phosphorylation site.  
 | PS00006 CK2\_PHOSPHO\_SITE Casein kinase II phosphorylation site.  
 | PS00008 MYRISTYL N-myristoylation site.  
 >GL215 | [gene=GL215] [protein=IEV transmembrane phosphoprotein]  
 | PS00001 ASN\_GLYCOSYLATION N-glycosylation site.

| PS00005 PKC\_PHOSPHO\_SITE Protein kinase C phosphorylation site.  
 | PS00006 CK2\_PHOSPHO\_SITE Casein kinase II phosphorylation site.  
 >GL216 | [gene=GL216] [protein=unknown ]  
 | PS00001 ASN\_GLYCOSYLATION N-glycosylation site.  
 | PS00004 CAMP\_PHOSPHO\_SITE cAMP- and cGMP-dependent protein kinase phosphorylation site.  
 | PS00005 PKC\_PHOSPHO\_SITE Protein kinase C phosphorylation site.  
 | PS00006 CK2\_PHOSPHO\_SITE Casein kinase II phosphorylation site.  
 | PS00008 MYRISTYL N-myristoylation site.  
 >GL217 | [gene=GL217] [protein=similar to putative A ORF O]  
 | PS00006 CK2\_PHOSPHO\_SITE Casein kinase II phosphorylation site.  
 | PS00008 MYRISTYL N-myristoylation site.  
 >GL218 | [gene=GL218] [protein=unknown ]  
 | PS00005 PKC\_PHOSPHO\_SITE Protein kinase C phosphorylation site.  
 | PS00007 TYR\_PHOSPHO\_SITE Tyrosine kinase phosphorylation site.  
 | PS00008 MYRISTYL N-myristoylation site.  
 | PS00342 MICROBODIES\_CTER Microbodies C-terminal targeting signal.  
 >GL219 | [gene=GL219] [protein=unknown, orthologous to unknown protein]  
 | PS00005 PKC\_PHOSPHO\_SITE Protein kinase C phosphorylation site.  
 >GL220 | [gene=GL220] [protein=CD47-like antigen/integrin-associated protein]  
 | PS00001 ASN\_GLYCOSYLATION N-glycosylation site.  
 | PS00005 PKC\_PHOSPHO\_SITE Protein kinase C phosphorylation site.  
 | PS00006 CK2\_PHOSPHO\_SITE Casein kinase II phosphorylation site.  
 | PS00008 MYRISTYL N-myristoylation site.  
 >GL221 | [gene=GL221] [protein=similar to putative A39R]  
 | PS00001 ASN\_GLYCOSYLATION N-glycosylation site.  
 | PS00005 PKC\_PHOSPHO\_SITE Protein kinase C phosphorylation site.  
 | PS00006 CK2\_PHOSPHO\_SITE Casein kinase II phosphorylation site.  
 | PS00007 TYR\_PHOSPHO\_SITE Tyrosine kinase phosphorylation site.  
 | PS00008 MYRISTYL N-myristoylation site.  
 | PS51004 SEMA Sema domain profile.  
 >GL222 | [gene=GL222] [protein=similar to putative A ORF P]  
 | PS00006 CK2\_PHOSPHO\_SITE Casein kinase II phosphorylation site.  
 | PS00008 MYRISTYL N-myristoylation site.  
 >GL223 | [gene=GL223] [protein=C-type lectin-like type-II membrane protein]  
 | PS00001 ASN\_GLYCOSYLATION N-glycosylation site.  
 | PS00005 PKC\_PHOSPHO\_SITE Protein kinase C phosphorylation site.  
 | PS00006 CK2\_PHOSPHO\_SITE Casein kinase II phosphorylation site.  
 | PS00007 TYR\_PHOSPHO\_SITE Tyrosine kinase phosphorylation site.  
 | PS00008 MYRISTYL N-myristoylation site.  
 | PS50041 C\_TYPE\_LLECTIN\_2 C-type lectin domain profile.  
 >GL224 | [gene=GL224] [protein=secreted glycoprotein]  
 | PS00001 ASN\_GLYCOSYLATION N-glycosylation site.  
 | PS00005 PKC\_PHOSPHO\_SITE Protein kinase C phosphorylation site.  
 | PS00006 CK2\_PHOSPHO\_SITE Casein kinase II phosphorylation site.  
 | PS00008 MYRISTYL N-myristoylation site.  
 >GL225 | [gene=GL225] [protein=profilin-like protein]  
 | PS00001 ASN\_GLYCOSYLATION N-glycosylation site.  
 | PS00005 PKC\_PHOSPHO\_SITE Protein kinase C phosphorylation site.  
 | PS00006 CK2\_PHOSPHO\_SITE Casein kinase II phosphorylation site.  
 | PS00008 MYRISTYL N-myristoylation site.  
 | PS00414 PROFILIN Profilin signature.  
 >GL226 | [gene=GL226] [protein=putative type-I membrane glycoprotein]  
 | PS00001 ASN\_GLYCOSYLATION N-glycosylation site.  
 | PS00005 PKC\_PHOSPHO\_SITE Protein kinase C phosphorylation site.

| PS00006 CK2\_PHOSPHO\_SITE Casein kinase II phosphorylation site.  
 >GL227 | [gene=GL227] [protein=hypothetical protein, orthologous to m0215]  
 | PS00005 PKC\_PHOSPHO\_SITE Protein kinase C phosphorylation site.  
 | PS00008 MYRISTYL N-myristoylation site.  
 >GL228 | [gene=GL228] [EC\_number=5.3.3.1, 1.1.1.145] [protein=hydroxysteroid dehydrogenase]  
 | PS00001 ASN\_GLYCOSYLATION N-glycosylation site.  
 | PS00004 CAMP\_PHOSPHO\_SITE cAMP- and cGMP-dependent protein kinase phosphorylation site.  
 | PS00005 PKC\_PHOSPHO\_SITE Protein kinase C phosphorylation site.  
 | PS00006 CK2\_PHOSPHO\_SITE Casein kinase II phosphorylation site.  
 | PS00008 MYRISTYL N-myristoylation site.  
 >GL229 | [gene=GL229] [EC\_number=1.15.1.1] [protein=Cu-Zn superoxide dismutase-like in virion, non- essential for replication or virulence]  
 | PS00006 CK2\_PHOSPHO\_SITE Casein kinase II phosphorylation site.  
 | PS00008 MYRISTYL N-myristoylation site.  
 >GL230 | [gene=GL230] [protein=Toll/IL1-receptor ]  
 | PS00001 ASN\_GLYCOSYLATION N-glycosylation site.  
 | PS00005 PKC\_PHOSPHO\_SITE Protein kinase C phosphorylation site.  
 | PS00006 CK2\_PHOSPHO\_SITE Casein kinase II phosphorylation site.  
 | PS00008 MYRISTYL N-myristoylation site.  
 >GL231 | [gene=GL231] [protein=hypothetical protein, orthologous to m0219L]  
 | PS00001 ASN\_GLYCOSYLATION N-glycosylation site.  
 | PS00006 CK2\_PHOSPHO\_SITE Casein kinase II phosphorylation site.  
 >GL232 | [gene=GL232] [protein=unknown ]  
 | PS00001 ASN\_GLYCOSYLATION N-glycosylation site.  
 | PS00004 CAMP\_PHOSPHO\_SITE cAMP- and cGMP-dependent protein kinase phosphorylation site.  
 | PS00005 PKC\_PHOSPHO\_SITE Protein kinase C phosphorylation site.  
 | PS00006 CK2\_PHOSPHO\_SITE Casein kinase II phosphorylation site.  
 | PS00008 MYRISTYL N-myristoylation site.  
 >GL233 | [gene=GL233] [protein=unknown, orthologs to unknown protein]  
 | PS00001 ASN\_GLYCOSYLATION N-glycosylation site.  
 | PS00005 PKC\_PHOSPHO\_SITE Protein kinase C phosphorylation site.  
 | PS00006 CK2\_PHOSPHO\_SITE Casein kinase II phosphorylation site.  
 >GL234 | [gene=GL234] [protein=thymidylate kinase]  
 | PS00004 CAMP\_PHOSPHO\_SITE cAMP- and cGMP-dependent protein kinase phosphorylation site.  
 | PS00005 PKC\_PHOSPHO\_SITE Protein kinase C phosphorylation site.  
 | PS00006 CK2\_PHOSPHO\_SITE Casein kinase II phosphorylation site.  
 | PS00007 TYR\_PHOSPHO\_SITE Tyrosine kinase phosphorylation site.  
 | PS00008 MYRISTYL N-myristoylation site.  
 | PS00017 ATP\_GTP\_A ATP/GTP-binding site motif A (P-loop).  
 | PS01331 THYMIDYLATE\_KINASE Thymidylate kinase signature.  
 >GL235 | [gene=GL235] [protein=unknown ]  
 | PS00005 PKC\_PHOSPHO\_SITE Protein kinase C phosphorylation site.  
 | PS00006 CK2\_PHOSPHO\_SITE Casein kinase II phosphorylation site.  
 | PS00008 MYRISTYL N-myristoylation site.  
 >GL236 | [gene=GL236] [protein=DNA ligase]  
 | PS00001 ASN\_GLYCOSYLATION N-glycosylation site.  
 | PS00004 CAMP\_PHOSPHO\_SITE cAMP- and cGMP-dependent protein kinase phosphorylation site.  
 | PS00005 PKC\_PHOSPHO\_SITE Protein kinase C phosphorylation site.  
 | PS00006 CK2\_PHOSPHO\_SITE Casein kinase II phosphorylation site.  
 | PS00008 MYRISTYL N-myristoylation site.  
 | PS00009 AMIDATION Amidation site.

| PS00697 DNA\_LIGASE\_A1 ATP-dependent DNA ligase AMP-binding site.  
 | PS00333 DNA\_LIGASE\_A2 ATP-dependent DNA ligase signature 2.  
 | PS50160 DNA\_LIGASE\_A3 ATP-dependent DNA ligase family profile.  
 >GL237 | [gene=GL237] [protein=similar to putative A ORF R]  
 | PS00004 CAMP\_PHOSPHO\_SITE cAMP- and cGMP-dependent protein kinase phosphorylation site.  
 | PS00005 PKC\_PHOSPHO\_SITE Protein kinase C phosphorylation site.  
 | PS00006 CK2\_PHOSPHO\_SITE Casein kinase II phosphorylation site.  
 >GL238 | [gene=GL238] [protein=similar to putative A ORF S]  
 | PS00001 ASN\_GLYCOSYLATION N-glycosylation site.  
 | PS00005 PKC\_PHOSPHO\_SITE Protein kinase C phosphorylation site.  
 | PS00006 CK2\_PHOSPHO\_SITE Casein kinase II phosphorylation site.  
 | PS00007 TYR\_PHOSPHO\_SITE Tyrosine kinase phosphorylation site.  
 | PS00008 MYRISTYL N-myristoylation site.  
 >GL239 | [gene=GL239] [protein=unknown ]  
 | PS00001 ASN\_GLYCOSYLATION N-glycosylation site.  
 | PS00005 PKC\_PHOSPHO\_SITE Protein kinase C phosphorylation site.  
 | PS00006 CK2\_PHOSPHO\_SITE Casein kinase II phosphorylation site.  
 | PS00008 MYRISTYL N-myristoylation site.  
 | PS00009 AMIDATION Amidation site.  
 >GL240 | [gene=GL240] [protein=Toll/IL1-receptor]  
 | PS00005 PKC\_PHOSPHO\_SITE Protein kinase C phosphorylation site.  
 | PS00006 CK2\_PHOSPHO\_SITE Casein kinase II phosphorylation site.  
 | PS00007 TYR\_PHOSPHO\_SITE Tyrosine kinase phosphorylation site.  
 | PS00008 MYRISTYL N-myristoylation site.  
 >GL241 | [gene=GL241] [protein=Tumor necrosis factor receptor]  
 | PS00001 ASN\_GLYCOSYLATION N-glycosylation site.  
 | PS00006 CK2\_PHOSPHO\_SITE Casein kinase II phosphorylation site.  
 | PS00008 MYRISTYL N-myristoylation site.  
 | PS50311 CYS\_RICH Cysteine-rich region profile.  
 | PS00652 TNFR\_NGFR\_1 TNFR/NGFR family cysteine-rich region signature.  
 | PS50050 TNFR\_NGFR\_2 TNFR/NGFR family cysteine-rich region domain profile.  
 >GL242 | [gene=GL242] [protein=putative protein orthologous to CMP170.5L]  
 | PS00005 PKC\_PHOSPHO\_SITE Protein kinase C phosphorylation site.  
 >GL243 | [gene=GL243] [protein=putative protein orthologous to CPXV192]  
 | PS00001 ASN\_GLYCOSYLATION N-glycosylation site.  
 >GL244 | [gene=GL244] [protein=kelch-like protein]  
 | PS00001 ASN\_GLYCOSYLATION N-glycosylation site.  
 | PS00004 CAMP\_PHOSPHO\_SITE cAMP- and cGMP-dependent protein kinase phosphorylation site.  
 | PS00005 PKC\_PHOSPHO\_SITE Protein kinase C phosphorylation site.  
 | PS00006 CK2\_PHOSPHO\_SITE Casein kinase II phosphorylation site.  
 | PS00007 TYR\_PHOSPHO\_SITE Tyrosine kinase phosphorylation site.  
 | PS00008 MYRISTYL N-myristoylation site.  
 | PS50097 BTB BTB domain profile.  
 >GL245 | [gene=GL245] [protein=hemagglutinin fragment]  
 | PS00001 ASN\_GLYCOSYLATION N-glycosylation site.  
 | PS00005 PKC\_PHOSPHO\_SITE Protein kinase C phosphorylation site.  
 | PS00006 CK2\_PHOSPHO\_SITE Casein kinase II phosphorylation site.  
 | PS00007 TYR\_PHOSPHO\_SITE Tyrosine kinase phosphorylation site.  
 | PS00008 MYRISTYL N-myristoylation site.  
 | PS50835 IG\_LIKE Ig-like domain profile.  
 >GL245.2 | [gene=GL245.2] [protein=beta-D-glucuronidase]  
 | PS00001 ASN\_GLYCOSYLATION N-glycosylation site.

| PS00004 CAMP\_PHOSPHO\_SITE cAMP- and cGMP-dependent protein kinase phosphorylation site.

| PS00005 PKC\_PHOSPHO\_SITE Protein kinase C phosphorylation site.

| PS00006 CK2\_PHOSPHO\_SITE Casein kinase II phosphorylation site.

| PS00007 TYR\_PHOSPHO\_SITE Tyrosine kinase phosphorylation site.

| PS00008 MYRISTYL N-myristoylation site.

| PS00009 AMIDATION Amidation site.

| PS00719 GLYCOSYL\_HYDROL\_F2\_1 Glycosyl hydrolases family 2 signature 1.

| PS00608 GLYCOSYL\_HYDROL\_F2\_2 Glycosyl hydrolases family 2 acid/base catalyst.

>GL245.5 | [gene=GL245.5] [protein=Unknown]

| PS00008 MYRISTYL N-myristoylation site.

| PS00017 ATP\_GTP\_A ATP/GTP-binding site motif A (P-loop).

>GL246 | [gene=GL246] [protein=guanylate kinase]

| PS00005 PKC\_PHOSPHO\_SITE Protein kinase C phosphorylation site.

| PS00006 CK2\_PHOSPHO\_SITE Casein kinase II phosphorylation site.

| PS00007 TYR\_PHOSPHO\_SITE Tyrosine kinase phosphorylation site.

| PS00008 MYRISTYL N-myristoylation site.

| PS50052 GUANYLATE\_KINASE\_2 Guanylate kinase-like domain profile.

>GL247 | [gene=GL247] [EC\_number=2.7.11.1] [protein=ser/thr kinase]

| PS00001 ASN\_GLYCOSYLATION N-glycosylation site.

| PS00005 PKC\_PHOSPHO\_SITE Protein kinase C phosphorylation site.

| PS00006 CK2\_PHOSPHO\_SITE Casein kinase II phosphorylation site.

| PS00007 TYR\_PHOSPHO\_SITE Tyrosine kinase phosphorylation site.

| PS00008 MYRISTYL N-myristoylation site.

| PS00016 RGD Cell attachment sequence.

| PS00108 PROTEIN\_KINASE\_ST Serine/Threonine protein kinases active-site signature.

| PS50011 PROTEIN\_KINASE\_DOM Protein kinase domain profile.

>GL248 | [gene=GL248] [protein=similar to putative B ORF A]

| PS00001 ASN\_GLYCOSYLATION N-glycosylation site.

| PS00005 PKC\_PHOSPHO\_SITE Protein kinase C phosphorylation site.

| PS00006 CK2\_PHOSPHO\_SITE Casein kinase II phosphorylation site.

>GL249 | [gene=GL249] [protein=unknown ]

| PS00001 ASN\_GLYCOSYLATION N-glycosylation site.

| PS00004 CAMP\_PHOSPHO\_SITE cAMP- and cGMP-dependent protein kinase phosphorylation site.

| PS00005 PKC\_PHOSPHO\_SITE Protein kinase C phosphorylation site.

| PS00006 CK2\_PHOSPHO\_SITE Casein kinase II phosphorylation site.

| PS00008 MYRISTYL N-myristoylation site.

>GL250 | [gene=GL250] [protein=similar to putative B ORF B]

| PS00001 ASN\_GLYCOSYLATION N-glycosylation site.

| PS00006 CK2\_PHOSPHO\_SITE Casein kinase II phosphorylation site.

>GL251 | [gene=GL251] [protein=similar to putative B ORF C]

| PS00006 CK2\_PHOSPHO\_SITE Casein kinase II phosphorylation site.

| PS00008 MYRISTYL N-myristoylation site.

>GL252 | [gene=GL252] [protein=unknown ]

| PS00001 ASN\_GLYCOSYLATION N-glycosylation site.

| PS00005 PKC\_PHOSPHO\_SITE Protein kinase C phosphorylation site.

| PS00008 MYRISTYL N-myristoylation site.

>GL253 | [gene=GL253] [protein=unknown]

| PS00001 ASN\_GLYCOSYLATION N-glycosylation site.

| PS00004 CAMP\_PHOSPHO\_SITE cAMP- and cGMP-dependent protein kinase phosphorylation site.

| PS00005 PKC\_PHOSPHO\_SITE Protein kinase C phosphorylation site.

| PS00006 CK2\_PHOSPHO\_SITE Casein kinase II phosphorylation site.

| PS00007 TYR\_PHOSPHO\_SITE Tyrosine kinase phosphorylation site.

| PS00008 MYRISTYL N-myristoylation site.

| PS00009 AMIDATION Amidation site.

| PS00000 MYRISTYL N-myristoylation site.

| PS00001 ASN\_GLYCOSYLATION N-glycosylation site.

| PS00004 CAMP\_PHOSPHO\_SITE cAMP- and cGMP-dependent protein kinase phosphorylation site.

| PS00005 PKC\_PHOSPHO\_SITE Protein kinase C phosphorylation site.

| PS00006 CK2\_PHOSPHO\_SITE Casein kinase II phosphorylation site.

| PS00007 TYR\_PHOSPHO\_SITE Tyrosine kinase phosphorylation site.

| PS00008 MYRISTYL N-myristoylation site.

| PS00009 AMIDATION Amidation site.

| PS50088 ANK\_REPEAT Ankyrin repeat profile.

| PS50297 ANK\_REP\_REGION Ankyrin repeat region circular profile.

| PS00036 BZIP\_BASIC Basic-leucine zipper (bZIP) domain signature.

>GL256 | [gene=GL256] [protein=EEV type-I membrane glycoprotein]

| PS00001 ASN\_GLYCOSYLATION N-glycosylation site.

| PS00005 PKC\_PHOSPHO\_SITE Protein kinase C phosphorylation site.

| PS00006 CK2\_PHOSPHO\_SITE Casein kinase II phosphorylation site.

| PS00007 TYR\_PHOSPHO\_SITE Tyrosine kinase phosphorylation site.

| PS00008 MYRISTYL N-myristoylation site.

| PS50923 SUSHI Sushi/CCP/SCR domain profile.

>GL257 | [gene=GL257] [protein=ankyrin-like protein]

| PS00001 ASN\_GLYCOSYLATION N-glycosylation site.

| PS00006 CK2\_PHOSPHO\_SITE Casein kinase II phosphorylation site.

| PS00008 MYRISTYL N-myristoylation site.

>GL258 | [gene=GL258] [protein=similar to putative B ORF D]

| PS00005 PKC\_PHOSPHO\_SITE Protein kinase C phosphorylation site.

| PS00006 CK2\_PHOSPHO\_SITE Casein kinase II phosphorylation site.

| PS00008 MYRISTYL N-myristoylation site.

| PS00029 LEUCINE\_ZIPPER Leucine zipper pattern.

>GL259 | [gene=GL259] [protein=21kDa precursor protein]

| PS00004 CAMP\_PHOSPHO\_SITE cAMP- and cGMP-dependent protein kinase phosphorylation site.

| PS00005 PKC\_PHOSPHO\_SITE Protein kinase C phosphorylation site.

| PS00006 CK2\_PHOSPHO\_SITE Casein kinase II phosphorylation site.

| PS00007 TYR\_PHOSPHO\_SITE Tyrosine kinase phosphorylation site.

| PS00008 MYRISTYL N-myristoylation site.

>GL260 | [gene=GL260] [protein=soluble interferon-gamma receptor-like protein]

| PS00001 ASN\_GLYCOSYLATION N-glycosylation site.

| PS00005 PKC\_PHOSPHO\_SITE Protein kinase C phosphorylation site.

| PS00006 CK2\_PHOSPHO\_SITE Casein kinase II phosphorylation site.

| PS00008 MYRISTYL N-myristoylation site.

| PS00016 RGD Cell attachment sequence.

>GL261 | [gene=GL261] [protein=Potential protein orthologous to RPXV171-Rabbitpox]

| PS00001 ASN\_GLYCOSYLATION N-glycosylation site.

| PS00005 PKC\_PHOSPHO\_SITE Protein kinase C phosphorylation site.

>GL262 | [gene=GL262] [protein=6kDa intracellular viral protein]

| PS00005 PKC\_PHOSPHO\_SITE Protein kinase C phosphorylation site.

| PS00006 CK2\_PHOSPHO\_SITE Casein kinase II phosphorylation site.

| PS00008 MYRISTYL N-myristoylation site.

>GL263 | [gene=GL263] [protein=unknown protein, kelch-like ]

| PS00001 ASN\_GLYCOSYLATION N-glycosylation site.  
 | PS00005 PKC\_PHOSPHO\_SITE Protein kinase C phosphorylation site.  
 | PS00006 CK2\_PHOSPHO\_SITE Casein kinase II phosphorylation site.  
 | PS00007 TYR\_PHOSPHO\_SITE Tyrosine kinase phosphorylation site.  
 | PS00008 MYRISTYL N-myristoylation site.  
 >GL264 | [gene=GL264] [protein=unknown ]  
 | PS00001 ASN\_GLYCOSYLATION N-glycosylation site.  
 | PS00006 CK2\_PHOSPHO\_SITE Casein kinase II phosphorylation site.  
 >GL265 | [gene=GL265] [EC\_number=2.7.11.1] [protein=ser/thr protein kinase-like protein]  
 | PS00001 ASN\_GLYCOSYLATION N-glycosylation site.  
 | PS00004 CAMP\_PHOSPHO\_SITE cAMP- and cGMP-dependent protein kinase phosphorylation site.  
 | PS00005 PKC\_PHOSPHO\_SITE Protein kinase C phosphorylation site.  
 | PS00006 CK2\_PHOSPHO\_SITE Casein kinase II phosphorylation site.  
 | PS00007 TYR\_PHOSPHO\_SITE Tyrosine kinase phosphorylation site.  
 | PS00008 MYRISTYL N-myristoylation site.  
 | PS00009 AMIDATION Amidation site.  
 | PS00016 RGD Cell attachment sequence.  
 | PS50011 PROTEIN\_KINASE\_DOM Protein kinase domain profile.  
 >GL266 | [gene=GL266] [protein=SPI-2/CrmA inhibits Fas-mediated apoptosis, IL-1 convertase, lipoxygenase pathway]  
 | PS00001 ASN\_GLYCOSYLATION N-glycosylation site.  
 | PS00005 PKC\_PHOSPHO\_SITE Protein kinase C phosphorylation site.  
 | PS00006 CK2\_PHOSPHO\_SITE Casein kinase II phosphorylation site.  
 | PS00008 MYRISTYL N-myristoylation site.  
 >GL267 | [gene=GL267] [protein=SPI-2/CrmA inhibits Fas-mediated apoptosis, IL-1 convertase, lipoxygenase pathway]  
 | PS00001 ASN\_GLYCOSYLATION N-glycosylation site.  
 | PS00005 PKC\_PHOSPHO\_SITE Protein kinase C phosphorylation site.  
 | PS00006 CK2\_PHOSPHO\_SITE Casein kinase II phosphorylation site.  
 | PS00284 SERPIN Serpins signature.  
 >GL268 | [gene=GL268] [protein=IL-1 binding B15R protein]  
 | PS00001 ASN\_GLYCOSYLATION N-glycosylation site.  
 | PS00005 PKC\_PHOSPHO\_SITE Protein kinase C phosphorylation site.  
 | PS00006 CK2\_PHOSPHO\_SITE Casein kinase II phosphorylation site.  
 | PS00008 MYRISTYL N-myristoylation site.  
 >GL269 | [gene=GL269] [protein=similar to putative B ORF E]  
 | PS00001 ASN\_GLYCOSYLATION N-glycosylation site.  
 | PS00006 CK2\_PHOSPHO\_SITE Casein kinase II phosphorylation site.  
 >GL270 | [gene=GL270] [protein=IL-1-beta-inhibitor ]  
 | PS00001 ASN\_GLYCOSYLATION N-glycosylation site.  
 | PS00005 PKC\_PHOSPHO\_SITE Protein kinase C phosphorylation site.  
 | PS00006 CK2\_PHOSPHO\_SITE Casein kinase II phosphorylation site.  
 | PS00007 TYR\_PHOSPHO\_SITE Tyrosine kinase phosphorylation site.  
 | PS00008 MYRISTYL N-myristoylation site.  
 | PS50835 IG\_LIKE Ig-like domain profile.  
 >GL271 | [gene=GL271] [protein=similar to putative B ORF F]  
 | PS00006 CK2\_PHOSPHO\_SITE Casein kinase II phosphorylation site.  
 >GL272 | [gene=GL272] [protein=unknown ]  
 | PS00001 ASN\_GLYCOSYLATION N-glycosylation site.  
 | PS00005 PKC\_PHOSPHO\_SITE Protein kinase C phosphorylation site.  
 | PS00006 CK2\_PHOSPHO\_SITE Casein kinase II phosphorylation site.  
 | PS00007 TYR\_PHOSPHO\_SITE Tyrosine kinase phosphorylation site.  
 | PS00008 MYRISTYL N-myristoylation site.  
 >GL273 | [gene=GL273] [protein=ankyrin-like protein]

| PS00001 ASN\_GLYCOSYLATION N-glycosylation site.  
 | PS00004 CAMP\_PHOSPHO\_SITE cAMP- and cGMP-dependent protein kinase phosphorylation site.  
 | PS00005 PKC\_PHOSPHO\_SITE Protein kinase C phosphorylation site.  
 | PS00006 CK2\_PHOSPHO\_SITE Casein kinase II phosphorylation site.  
 | PS00007 TYR\_PHOSPHO\_SITE Tyrosine kinase phosphorylation site.  
 | PS00008 MYRISTYL N-myristoylation site.  
 | PS00342 MICROBODIES\_CTER Microbodies C-terminal targeting signal.  
 | PS50088 ANK\_REPEAT Ankyrin repeat profile.  
 | PS50297 ANK\_REP\_REGION Ankyrin repeat region circular profile.  
 | PS50181 FBOX F-box domain profile.  
 >GL274 | [gene=GL274] [protein=IFN-alpha/beta-receptor-like secreted glycoprotein]  
 | PS00001 ASN\_GLYCOSYLATION N-glycosylation site.  
 | PS00005 PKC\_PHOSPHO\_SITE Protein kinase C phosphorylation site.  
 | PS00006 CK2\_PHOSPHO\_SITE Casein kinase II phosphorylation site.  
 | PS00008 MYRISTYL N-myristoylation site.  
 | PS50835 IG\_LIKE Ig-like domain profile.  
 >GL275 | [gene=GL275] [protein=similar to putative B2OR]  
 | PS00001 ASN\_GLYCOSYLATION N-glycosylation site.  
 | PS00005 PKC\_PHOSPHO\_SITE Protein kinase C phosphorylation site.  
 | PS00006 CK2\_PHOSPHO\_SITE Casein kinase II phosphorylation site.  
 | PS50328 TYR\_RICH Tyrosine-rich region profile.  
 >GL276 | [gene=GL276] [protein=unknown]  
 | PS00001 ASN\_GLYCOSYLATION N-glycosylation site.  
 | PS00006 CK2\_PHOSPHO\_SITE Casein kinase II phosphorylation site.  
 >GL277 | [gene=GL277] [protein=interleukin-18-binding protein]  
 | PS00005 PKC\_PHOSPHO\_SITE Protein kinase C phosphorylation site.  
 | PS00006 CK2\_PHOSPHO\_SITE Casein kinase II phosphorylation site.  
 | PS00008 MYRISTYL N-myristoylation site.  
 >GL278 | [gene=GL278] [protein=zinc finger-like protein]  
 | PS00001 ASN\_GLYCOSYLATION N-glycosylation site.  
 | PS00004 CAMP\_PHOSPHO\_SITE cAMP- and cGMP-dependent protein kinase phosphorylation site.  
 | PS00005 PKC\_PHOSPHO\_SITE Protein kinase C phosphorylation site.  
 | PS00006 CK2\_PHOSPHO\_SITE Casein kinase II phosphorylation site.  
 | PS00008 MYRISTYL N-myristoylation site.  
 | PS00518 ZF\_RING\_1 Zinc finger RING-type signature.  
 | PS50089 ZF\_RING\_2 Zinc finger RING-type profile.  
 >GL279 | [gene=GL279] [protein=zinc finger-like; apoptosis]  
 | PS00001 ASN\_GLYCOSYLATION N-glycosylation site.  
 | PS00005 PKC\_PHOSPHO\_SITE Protein kinase C phosphorylation site.  
 | PS00008 MYRISTYL N-myristoylation site.  
 | PS51301 KILA\_N Kila-N domain profile.  
 >GL280 | [gene=GL280] [protein=fragment of IL-1Ra]  
 | PS00001 ASN\_GLYCOSYLATION N-glycosylation site.  
 | PS00004 CAMP\_PHOSPHO\_SITE cAMP- and cGMP-dependent protein kinase phosphorylation site.  
 | PS00005 PKC\_PHOSPHO\_SITE Protein kinase C phosphorylation site.  
 | PS00006 CK2\_PHOSPHO\_SITE Casein kinase II phosphorylation site.  
 | PS00007 TYR\_PHOSPHO\_SITE Tyrosine kinase phosphorylation site.  
 | PS00008 MYRISTYL N-myristoylation site.  
 | PS00009 AMIDATION Amidation site.  
 >GL281 | [gene=GL281] [protein=similar to putative C ORF E]  
 | PS00001 ASN\_GLYCOSYLATION N-glycosylation site.  
 >GL282 | [gene=GL282] [protein=secreted epidermal growth factor-like protein]

| PS00001 ASN\_GLYCOSYLATION N-glycosylation site.  
 | PS00005 PKC\_PHOSPHO\_SITE Protein kinase C phosphorylation site.  
 | PS00006 CK2\_PHOSPHO\_SITE Casein kinase II phosphorylation site.  
 | PS00007 TYR\_PHOSPHO\_SITE Tyrosine kinase phosphorylation site.  
 | PS00008 MYRISTYL N-myristoylation site.  
 | PS00022 EGF\_1 EGF-like domain signature 1.  
 | PS01186 EGF\_2 EGF-like domain signature 2.  
 | PS50026 EGF\_3 EGF-like domain profile.  
 >GL282.5 | [gene=GL282.5] [protein=very short ORF, well conserved putative early and late promoter]  
 | PS00001 ASN\_GLYCOSYLATION N-glycosylation site.  
 | PS00005 PKC\_PHOSPHO\_SITE Protein kinase C phosphorylation site.  
 >GL283 | [gene=GL283] [protein=serine protease inhibitor-like SPI-1]  
 | PS00001 ASN\_GLYCOSYLATION N-glycosylation site.  
 | PS00005 PKC\_PHOSPHO\_SITE Protein kinase C phosphorylation site.  
 | PS00006 CK2\_PHOSPHO\_SITE Casein kinase II phosphorylation site.  
 | PS00008 MYRISTYL N-myristoylation site.  
 | PS00284 SERPIN Serpins signature.  
 >GL284 | [gene=GL284] [protein=putative host-range protein, similar to C17L]  
 | PS00001 ASN\_GLYCOSYLATION N-glycosylation site.  
 | PS00005 PKC\_PHOSPHO\_SITE Protein kinase C phosphorylation site.  
 | PS00007 TYR\_PHOSPHO\_SITE Tyrosine kinase phosphorylation site.  
 | PS00008 MYRISTYL N-myristoylation site.  
 >GL285 | [gene=GL285] [protein=putative host-range protein, similar to C17L]  
 | PS00001 ASN\_GLYCOSYLATION N-glycosylation site.  
 | PS00004 CAMP\_PHOSPHO\_SITE cAMP- and cGMP-dependent protein kinase phosphorylation site.  
 | PS00005 PKC\_PHOSPHO\_SITE Protein kinase C phosphorylation site.  
 | PS00006 CK2\_PHOSPHO\_SITE Casein kinase II phosphorylation site.  
 | PS00008 MYRISTYL N-myristoylation site.  
 | PS51257 PROKAR\_LIPOPROTEIN Prokaryotic membrane lipoprotein lipid attachment site profile.  
 >GL291 | [gene=GL291] [protein=similar to putative C ORF H]

---

|    | <b>Abbreviation</b> | <b>Locations</b> | <b>Description (accession number)</b>            |
|----|---------------------|------------------|--------------------------------------------------|
| 1  | GLV-1h68            | 54190..144462    | vaccinia virus strain GLV-1h68 (EU410304)        |
| 2  | DUKE                | 58159..139791    | vaccinia virus strain DUKE (DQ439815)            |
| 3  | COP                 | 56141..137787    | vaccinia virus strain Copenhagen (M35027)        |
| 4  | MVA                 | 47897..129414    | vaccinia virus strain Ankara (U94848)            |
| 5  | CP_GRI              | 69243..150930    | cowpox virus strain GRI-90 (X94355)              |
| 6  | ACAM                | 55854..137498    | accinia virus strain ACAM2000 (AY313847)         |
| 7  | WR                  | 53010..134667    | vaccinia virus strain Western Reserve (AY243312) |
| 8  | MP_SL               | 52741..134378    | monkeypox virus isolate Sierra Leone (AY741551)  |
| 9  | ECT_MOS             | 61822..143478    | ectromelia virus strain Moscow (AF012825)        |
| 10 | VAR_IND             | 43828..125446    | variola virus India-1967 (X69198)                |
| 11 | VAR_GAR             | 44823..126451    | variola virus Garcia-1966 (Y16780)               |
| 12 | CAM_CMS             | 54089..135765    | camelpox virus CMS (AY009089)                    |
| 13 | LIST                | 55511..137189    | vaccinia Lister major strain (AY678276)          |
| 14 | MP_ZAI              | 53064..134679    | monkeypox virus strain Zaire-96-I-16 (AF380138)  |
| 15 | VAR_BSH             | 44460..126076    | variola virus Bangladesh-1975 (L22578)           |
| 16 | LC                  | 55632..137303    | vaccinia Lister isolate LC16mO (AY678277)        |

**List S2. Highly conserved region across poxvirus strains on which the phylogenetic analysis was performed.**
